# Supplementary material for: Robust chromatin state annotation
Source: HighWire-hosted journal article supplement (doi:10.1101/gr.278343.123), 2024-03-21
Supplement: Supplemental_Document.pdf [file Supplemental_Document.pdf]

# Robust chromatin state annotation

Mehdi Foroozandeh Shahraki, Marjan Farahbod, Maxwell Libbrecht \*

## 1 Model training and annotation

### 1.1 Segway

Segway requires inputs to be loaded on a Genomedata file [Hoffman et al., 2010]. We loaded all the track files belonging to each replicate on a Genomedata file. As training Segway on whole-genome is computationally expensive, we trained the Segway model on mini-batches of 3 percent of the genome [Hoffman et al., 2013, Chan et al., 2018, Hoffman et al., 2012] (Table 1), and we obtained genome annotations and posterior probability values.

The hyper-parameter `--minibatch-fraction` specifies the fraction of the genome that is randomly selected by Segway at each training iteration and used for training [Chan et al., 2018].

With default parameter settings, Segway’s posterior probabilities lack numerical precision due to underflow and overflow of floating points such that >90% of genomic positions receive either exactly zero or exactly one posterior value. To mitigate this issue and to enable downstream reproducibility analysis based on granular posterior probability values, we need to tune hyper-parameters. To tackle this issue and to obtain granular probability values, we artificially softened the model’s posterior by raising the emission probabilities (`--track-weights`) to the power of  $e = 0.01$  ( $\frac{1}{\text{--resolution}}$ ) and by doing so, we uniformly decreased the model’s confidence. The hyper-parameter `--track-weights` is the exponent of emission probability, and the modified posterior values are calculated as follows:

$$P(Q_{1,...,T} = q_{1,...,T} | X_{1,...,T}) = \prod_{t=1}^T P(Q_t = q_t | Q_{t-1}) P(X_t | Q_t = q_t)^e \quad (1)$$

Where,  $P(X_t | Q_t = q_t)$  and  $P(Q_t = q_t | Q_{t-1})$  are emission and transition probabilities, respectively, and 0.01 which is the exponent of emission probability is specified to the model through the hyper-parameter `--track-weights`. This additional step mitigates the issue of lack of granularity by increasing the number of positions with granular posterior value. Moreover, to specify the number of labels, we used the formula  $(10 + 2\sqrt{\text{number of assays}})$  as suggested by [Libbrecht et al., 2019] to scale with the amount of available data. For all of our collected datasets with 10 to 13 histone modification assays, the number of labels is 16. Generally, having longer segments is desired for Segway [Hoffman et al., 2012, Chan et al., 2018] therefore, this method uses hard and soft constraints for controlling the length distribution of segments. The hyper-parameters `--prior-strength` and `--segtransition-weight-scale` are the soft constraints and act as length prior and exponent of transition probability, respectively. For Segway, we mostly followed the hyper-parameter settings of [Libbrecht et al., 2019].

| Hyper-parameter                           | Value                                  |
|-------------------------------------------|----------------------------------------|
| <code>--resolution</code>                 | 100                                    |
| <code>--num-labels</code>                 | $10 + 2\sqrt{\text{number of assays}}$ |
| <code>--track-weight</code>               | $\frac{1}{100}$                        |
| <code>--segtransition-weight-scale</code> | 1                                      |
| <code>--prior-strength</code>             | 1                                      |
| <code>--minibatch-fraction</code>         | 0.03                                   |

Table 1: Hyper-parameters used to train Segway models

### 1.2 ChromHMM

For ChromHMM we followed standard practice and trained the models with default hyper-parameter setting and on the whole genome. For ChromHMM runs, the `--resolution` = 200 and the model is trained on whole genome. As a pre-processing step, ChromHMM binarizes the signals throughout the genome, using a hard threshold on the Poisson distribution probability [Ernst and Kellis, 2012], with each position having an indicator of the presence or absence of a certain epigenetic mark. Lastly, trained ChromHMM models provided genome annotations and their corresponding posterior probabilities.

### 1.3 Interpretation of Chromatin State Types

The table below provides an interpretation of chromatin state types in terms of their biological roles. These interpretations were generated using an automated method described in [Libbrecht et al., 2019], which predicts the biological interpretation of each label based on its enrichment around conserved regions and its association with different histone modification marks. It is important to note that these interpretation terms are provided for the purpose of making the results more interpretable, and all steps of the reproducibility evaluation pipeline are independent of these terms.

| Chromatin State Type | Short Name | Description                                                                                                                                                                           |
|----------------------|------------|---------------------------------------------------------------------------------------------------------------------------------------------------------------------------------------|
| Promoter             | Prom       | Presence of promoter-associated marks H3K4me3 and H3K9ac. Highly enriched at transcription start sites (TSSs).                                                                        |
| PromoterFlanking     | Prom fla   | Presence of promoter-associated marks H3K4me3 and H3K9ac, but at lower levels than Promoters. Tends to occur upstream or downstream of TSSs.                                          |
| Enhancer             | Enha       | Presence of the enhancer-associated marks H3K27ac and H3K4me1.                                                                                                                        |
| EnhancerLow          | Enha_low   | Same as Enhancer, but with lower signal values.                                                                                                                                       |
| Bivalent             | Biva       | Presence of both activating (H3K27ac) and repressive (H3K27me3) marks. Thought to mark regulatory elements “poised” for activation.                                                   |
| CTCF                 |            | Presence of the transcription factor CTCF, thought to play a role in chromatin conformation. In samples without measured CTCF, this label marks positions with CTCF-associated marks. |
| Transcribed          | Tran       | Characterized by the transcription-associated mark H3K36me3. Highly enriched in annotated gene bodies.                                                                                |
| K9K36                | K9K36      | Presence of the marks H3K9me3 and H3K36me3, a pattern associated with zinc finger genes.                                                                                              |
| FacultativeHet       | Facu       | Facultative (Polycomb) Heterochromatin, characterized by the histone modification H3K27me3. Thought to carry out cell type-specific repression.                                       |
| ConstitutiveHet      | Cons       | Constitutive Heterochromatin, characterized by the histone modification H3K9me3. Marks permanently silent regions such as centromeres and telomeres.                                  |
| Quiescent            | Quie       | Lack of any marks                                                                                                                                                                     |



## 2 Comprehensive evaluation of chromatin state reproducibility

### 2.1 Setting 1: Different Data, Different Models

#### 2.1.1 ChromHMM

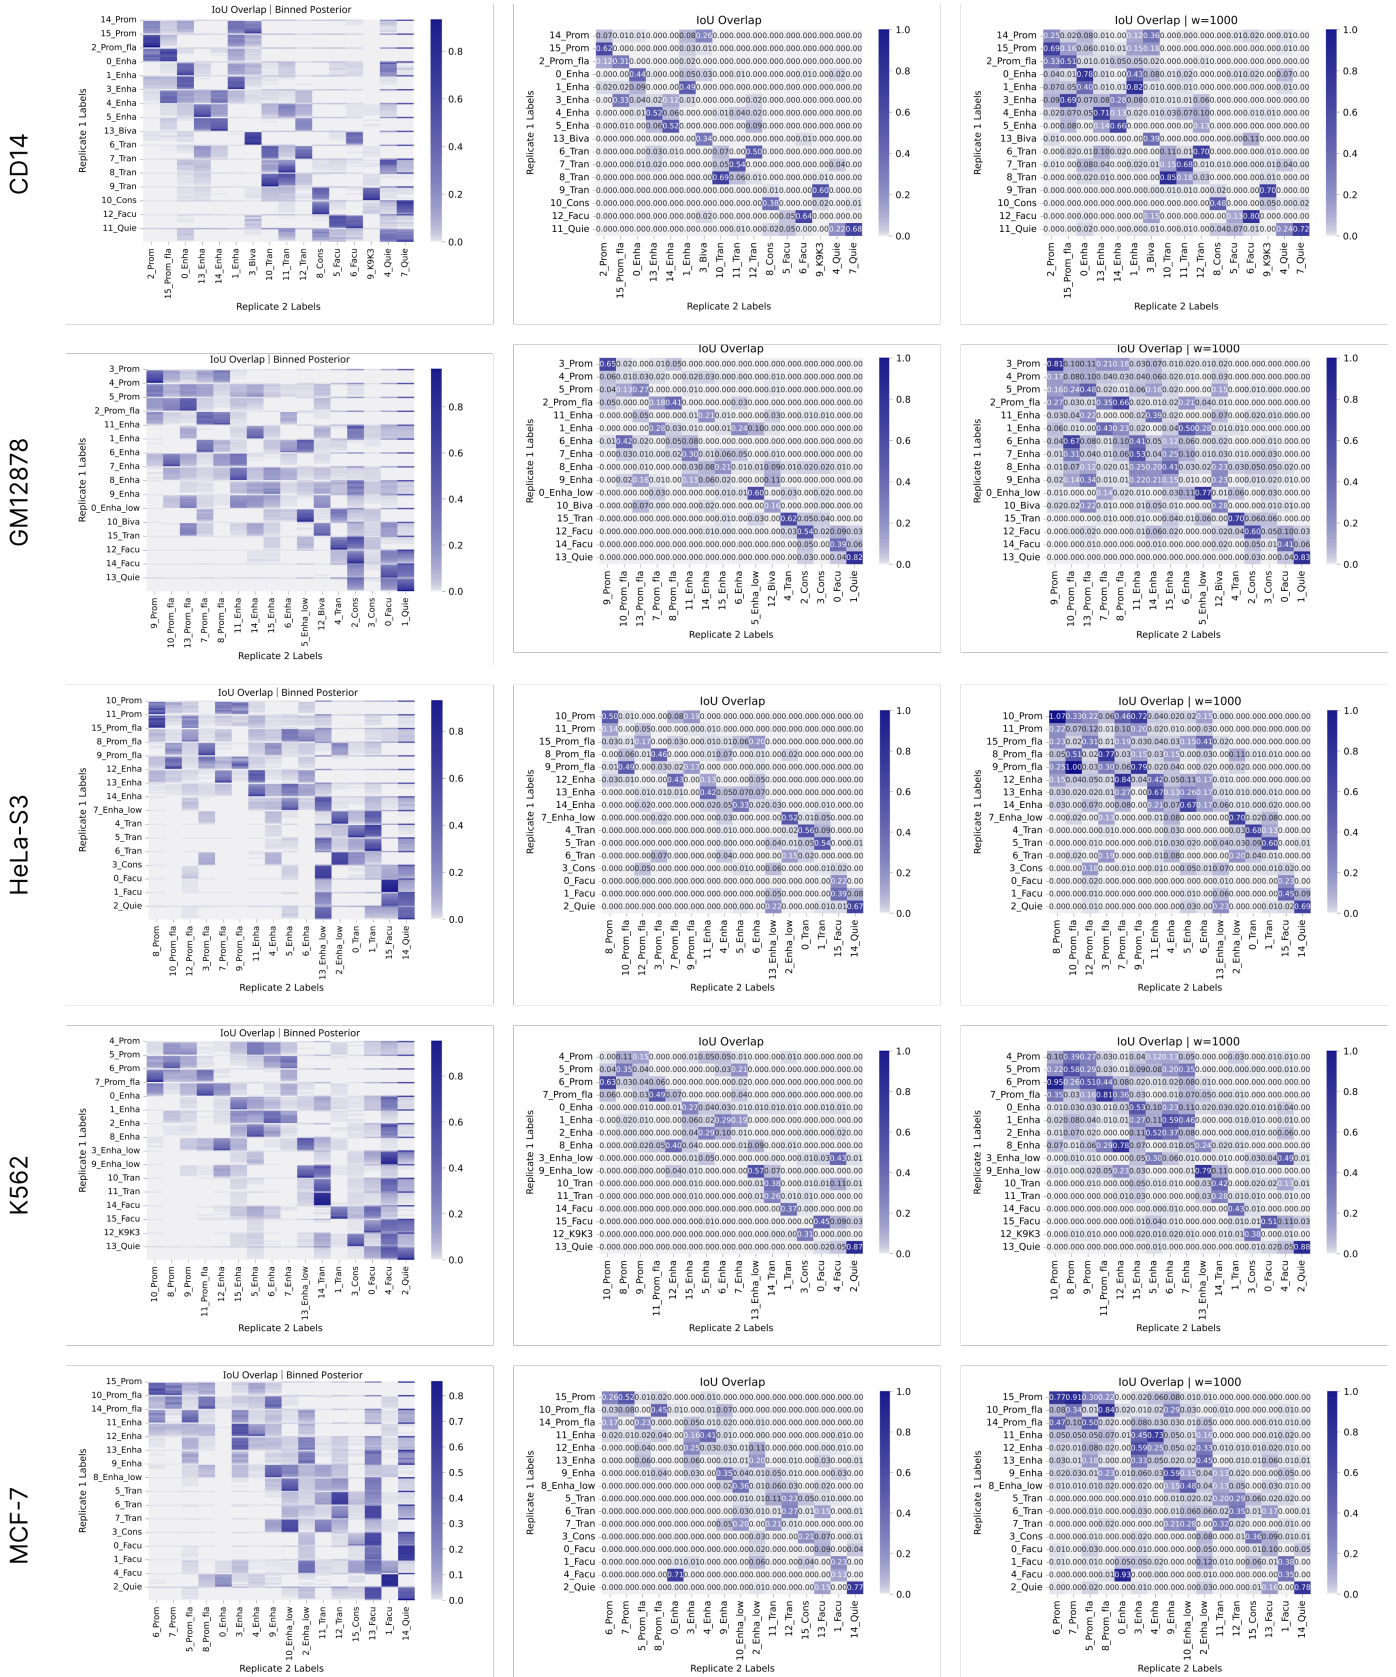

Figure 1: Intersection over union (IoU) overlap of ChromHMM according to setting 1 (different data, different models). Columns from left to right are binned posterior, IoU overlap with maximum-a-posterior state with  $w = 0$ , IoU overlap with maximum-a-posterior state with  $w = 1000$ . Color axis is linear and rows correspond to five cell types.

## 2.1.2 Segway

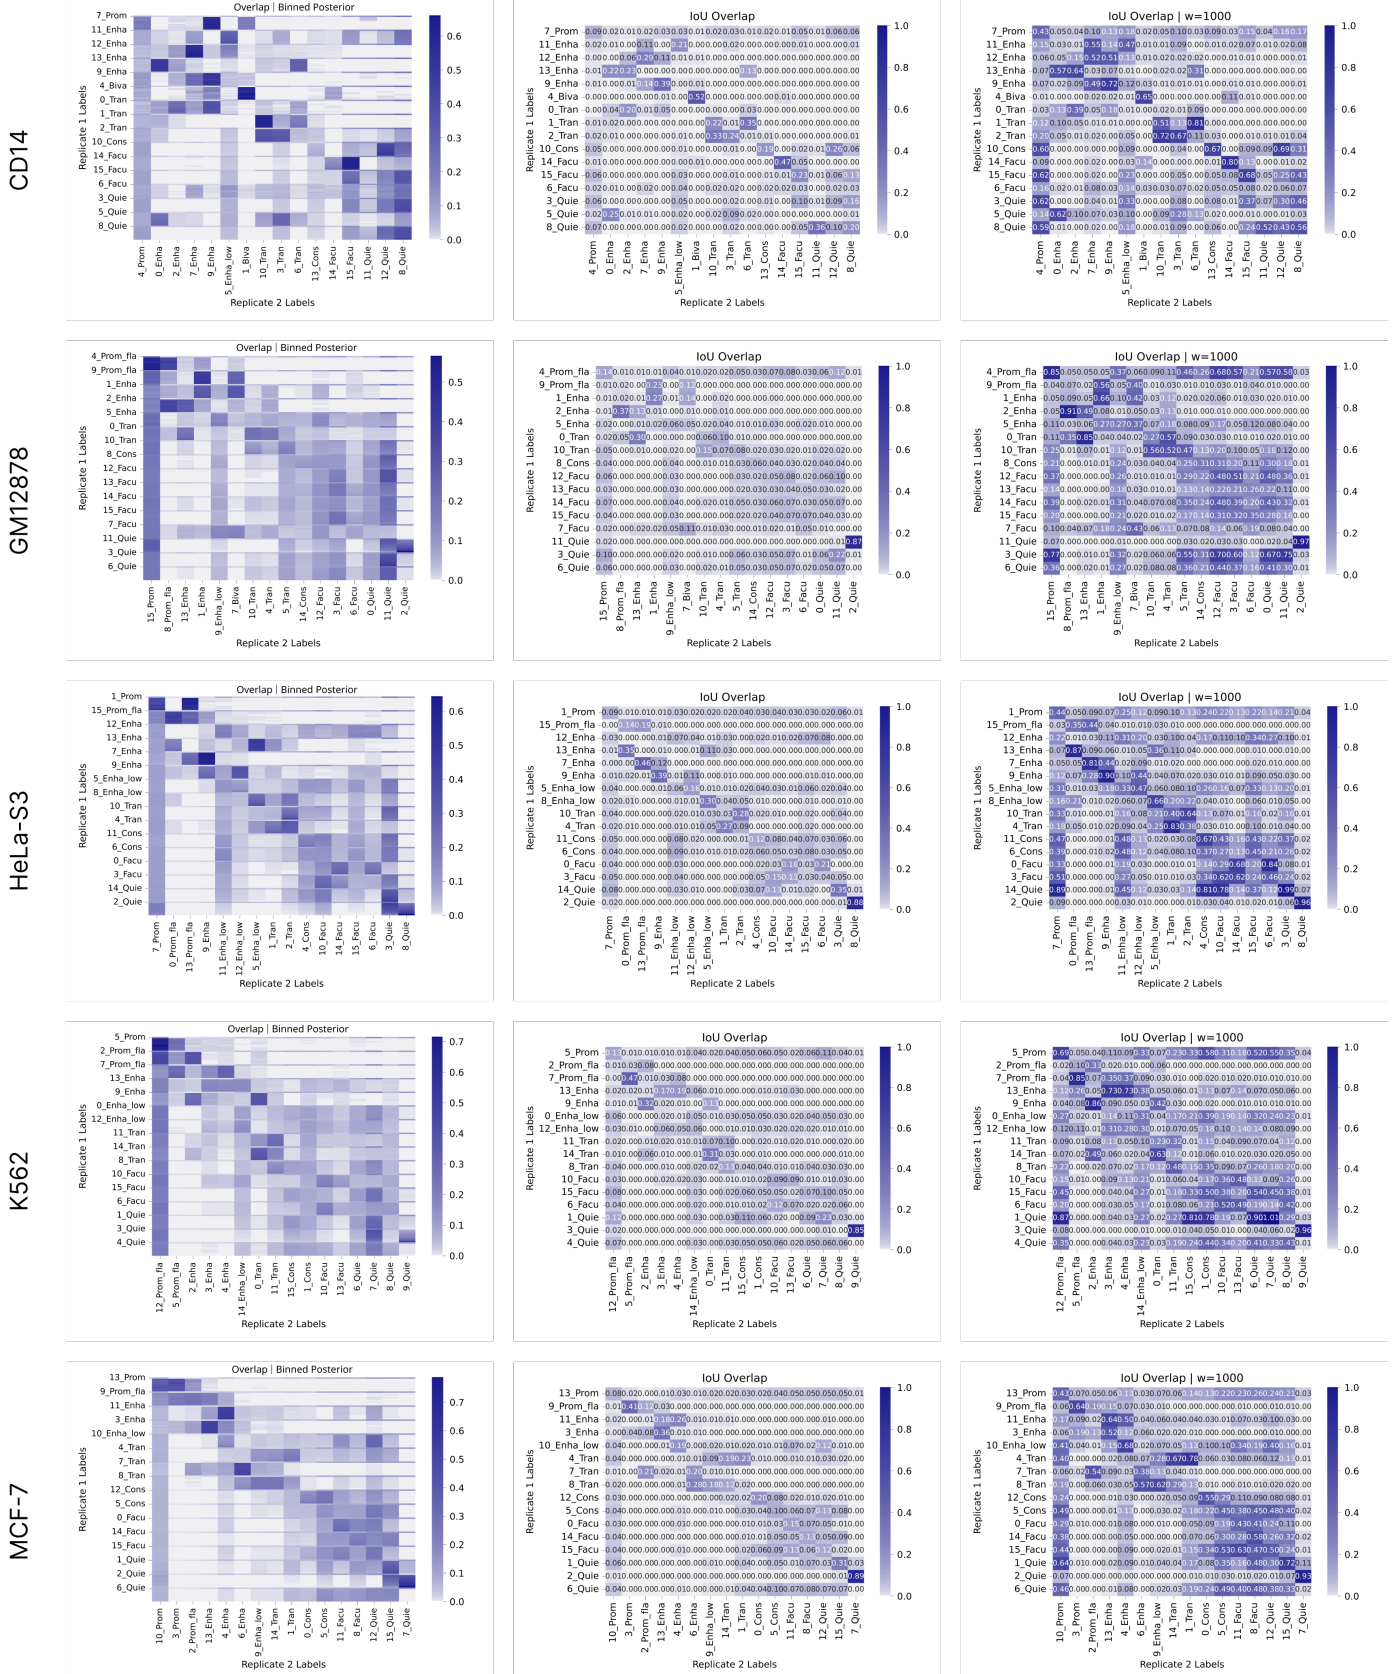

Figure 2: Intersection over union (IoU) overlap of Segway according to setting 1 (different data, different models). Columns from left to right are binned posterior, IoU overlap with maximum-a-posterior state with  $w = 0$ , IoU overlap with maximum-a-posterior state with  $w = 1000$ . Color axis is linear and rows correspond to five cell types.

## 2.2 Setting 2: Different Data, Same Model

### 2.2.1 ChromHMM

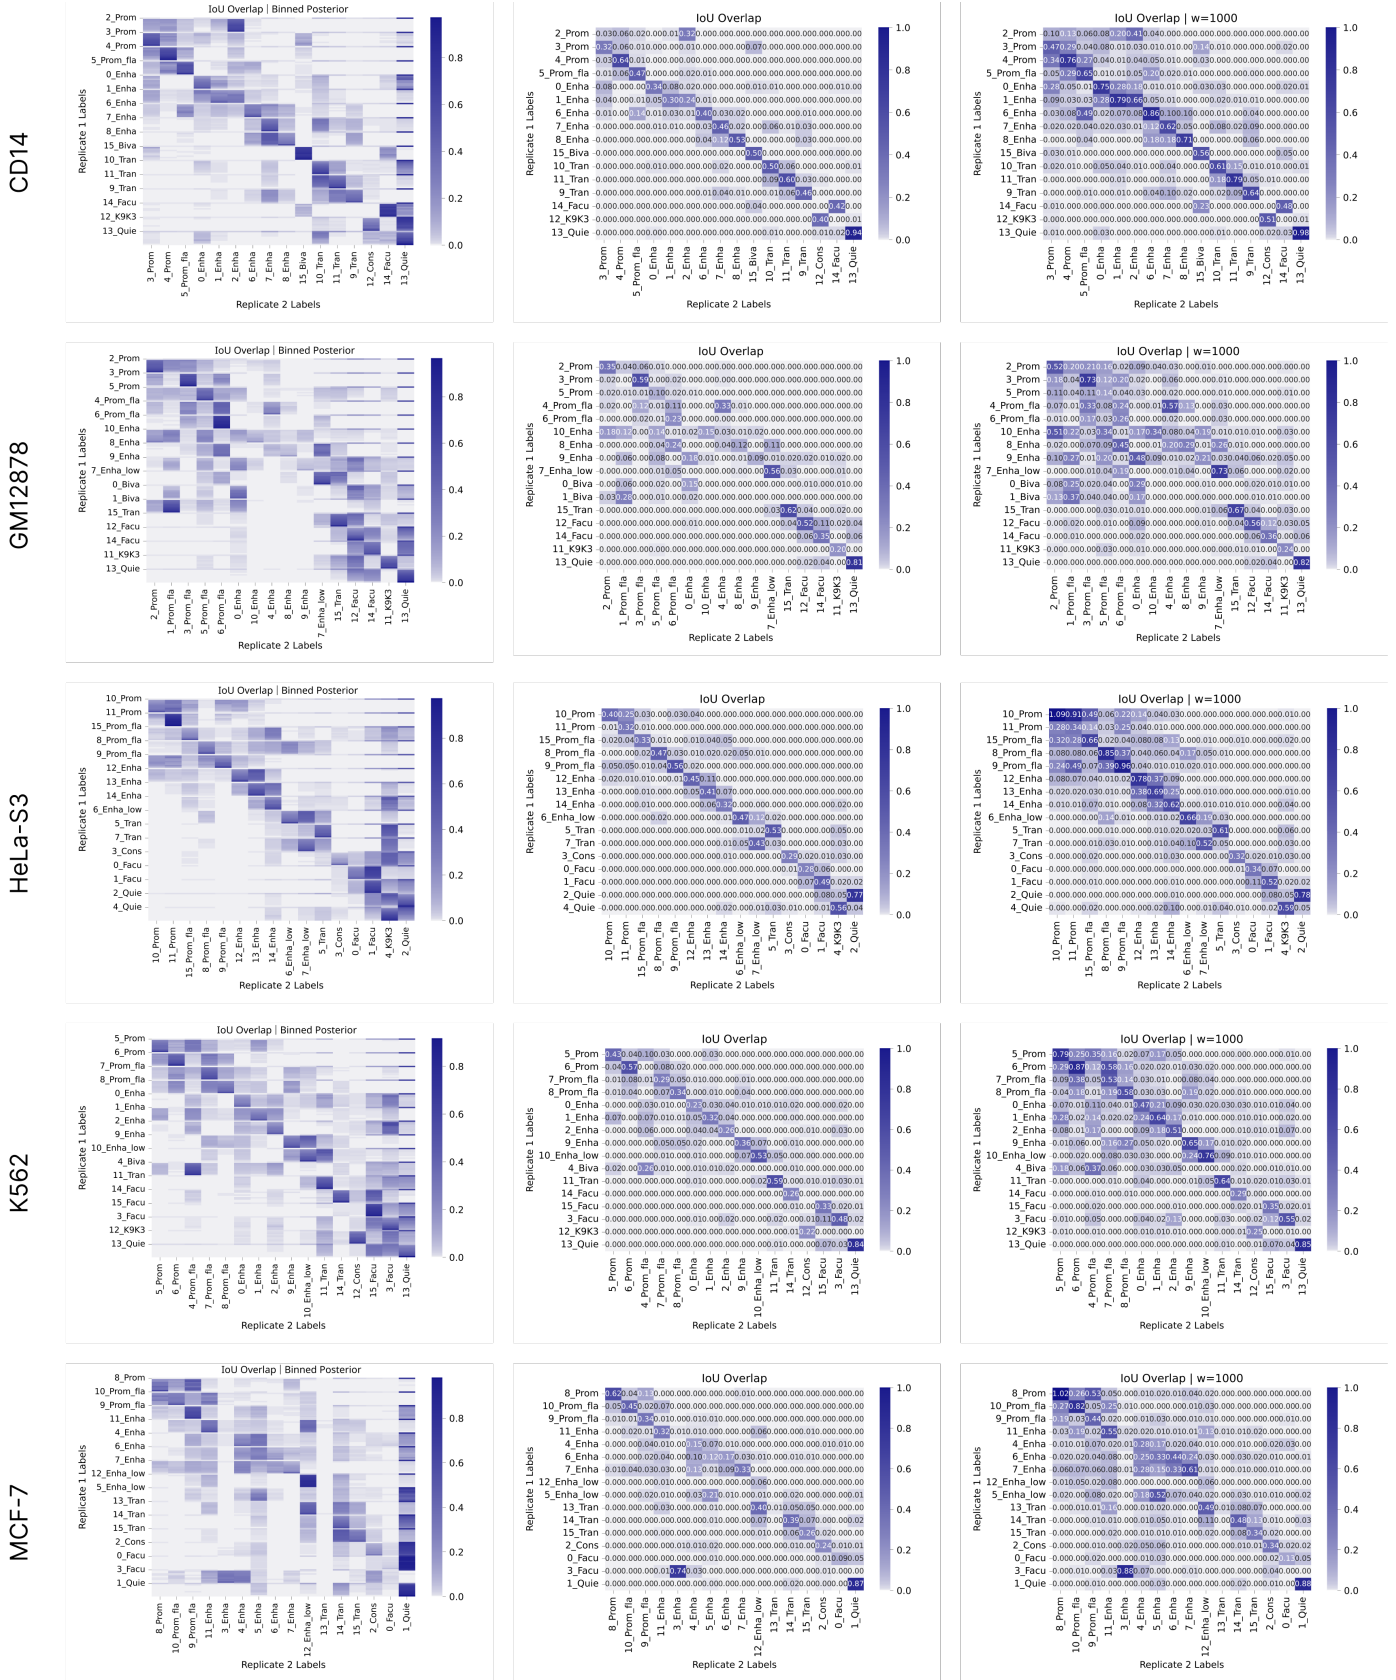

Figure 3: Intersection over union (IoU) overlap of ChromHMM according to (setting 2: different data, same model). Columns from left to right are binned posterior, IoU overlap with maximum-a-posterior state with  $w = 0$ , IoU overlap with maximum-a-posterior state with  $w = 1000$ . Color axis is linear and rows correspond to five cell types.



## 2.2.2 Segway

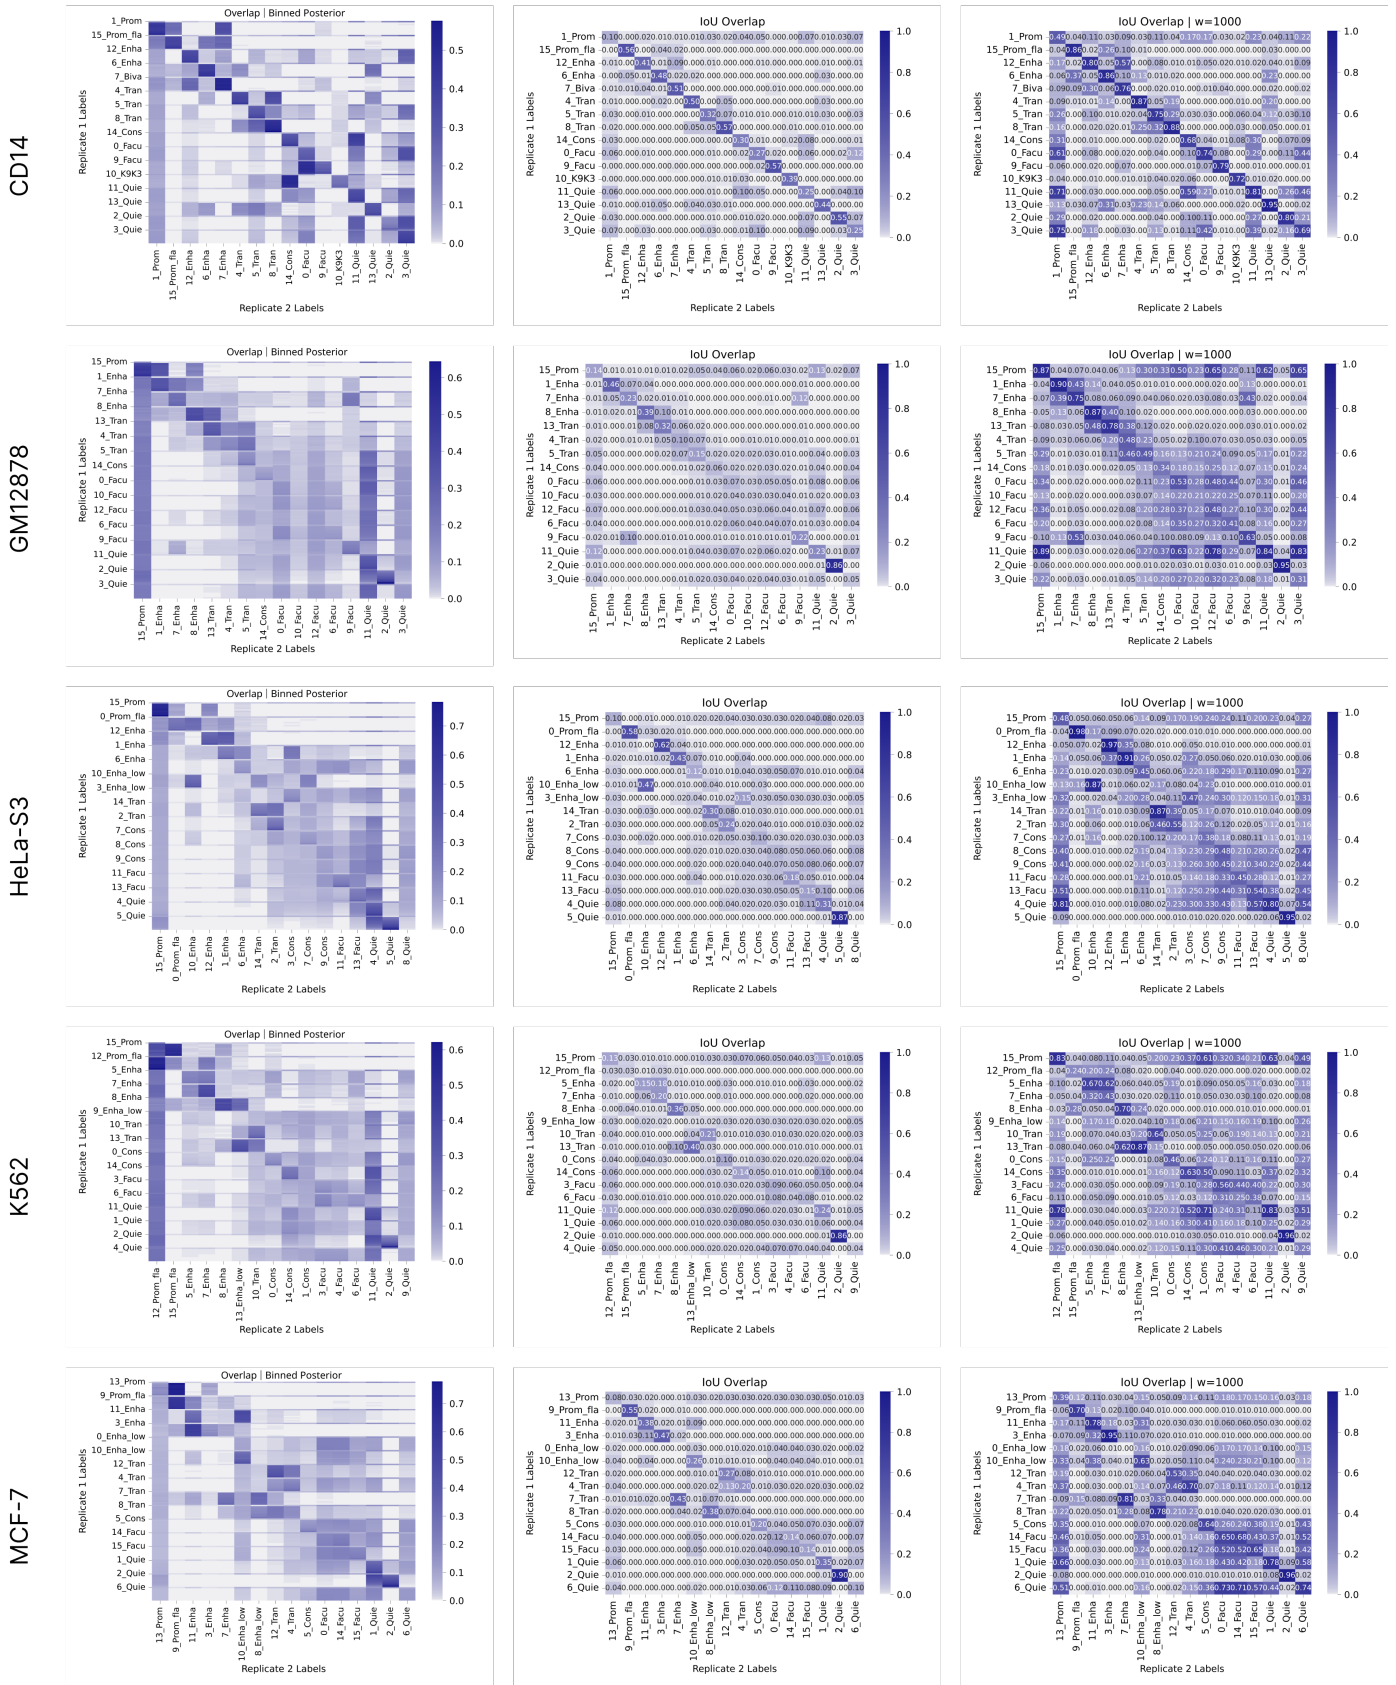

Figure 4: Intersection over union (IoU) overlap of Segway according to (setting 2: different data, same model). Columns from left to right are binned posterior, IoU overlap with maximum-a-posterior state with  $w = 0$ , IoU overlap with maximum-a-posterior state with  $w = 1000$ . Color axis is linear and rows correspond to five cell types.

## 2.3 Setting 3: Same Data, Different Models

### 2.3.1 ChromHMM

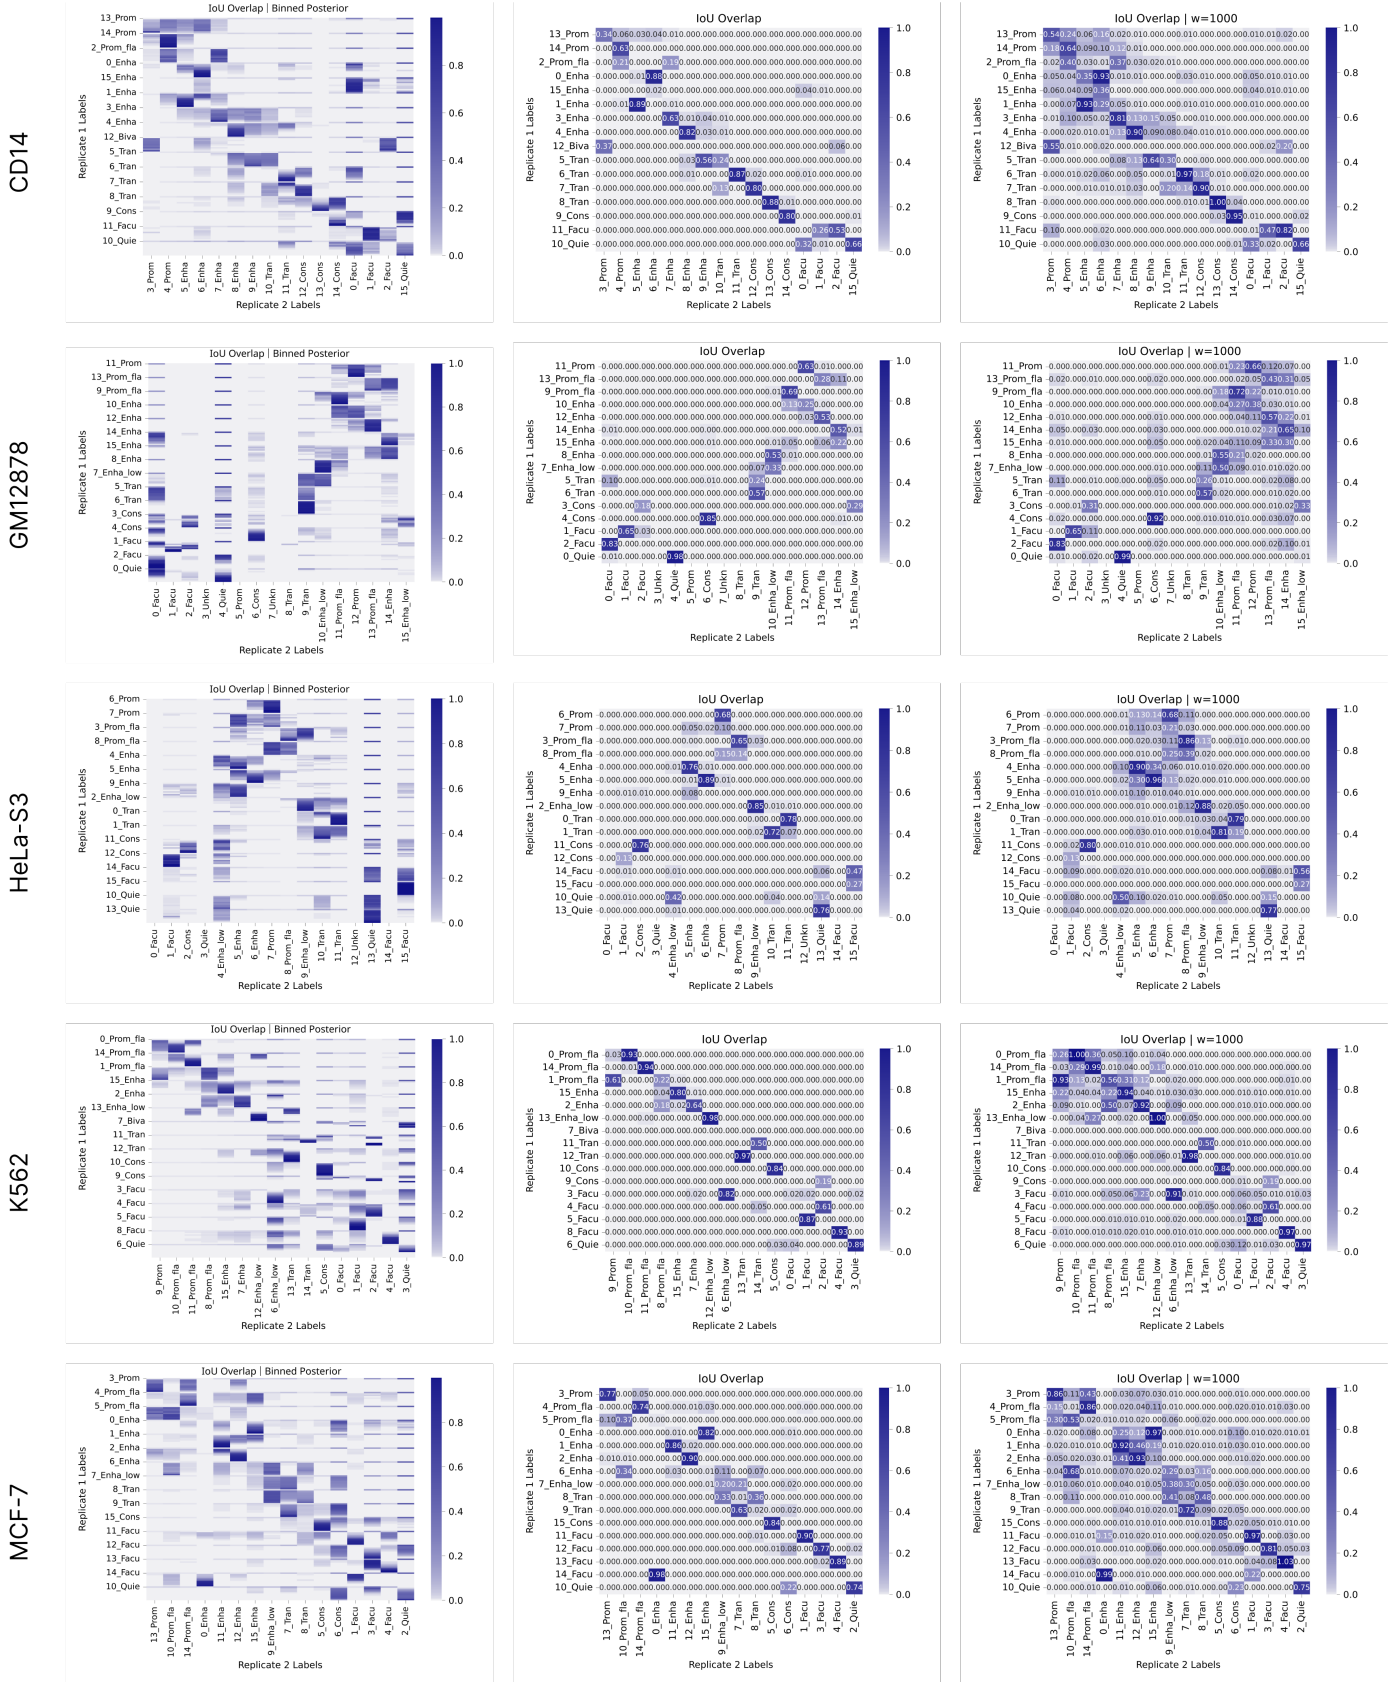

Figure 5: Intersection over union (IoU) overlap of ChromHMM according to (Setting 3: Same Data, Different Models). Columns from left to right are binned posterior, IoU overlap with maximum-a-posterior state with  $w = 0$ , IoU overlap with maximum-a-posterior state with  $w = 1000$ . Color axis is linear and rows correspond to five cell types.

## 2.3.2 Segway

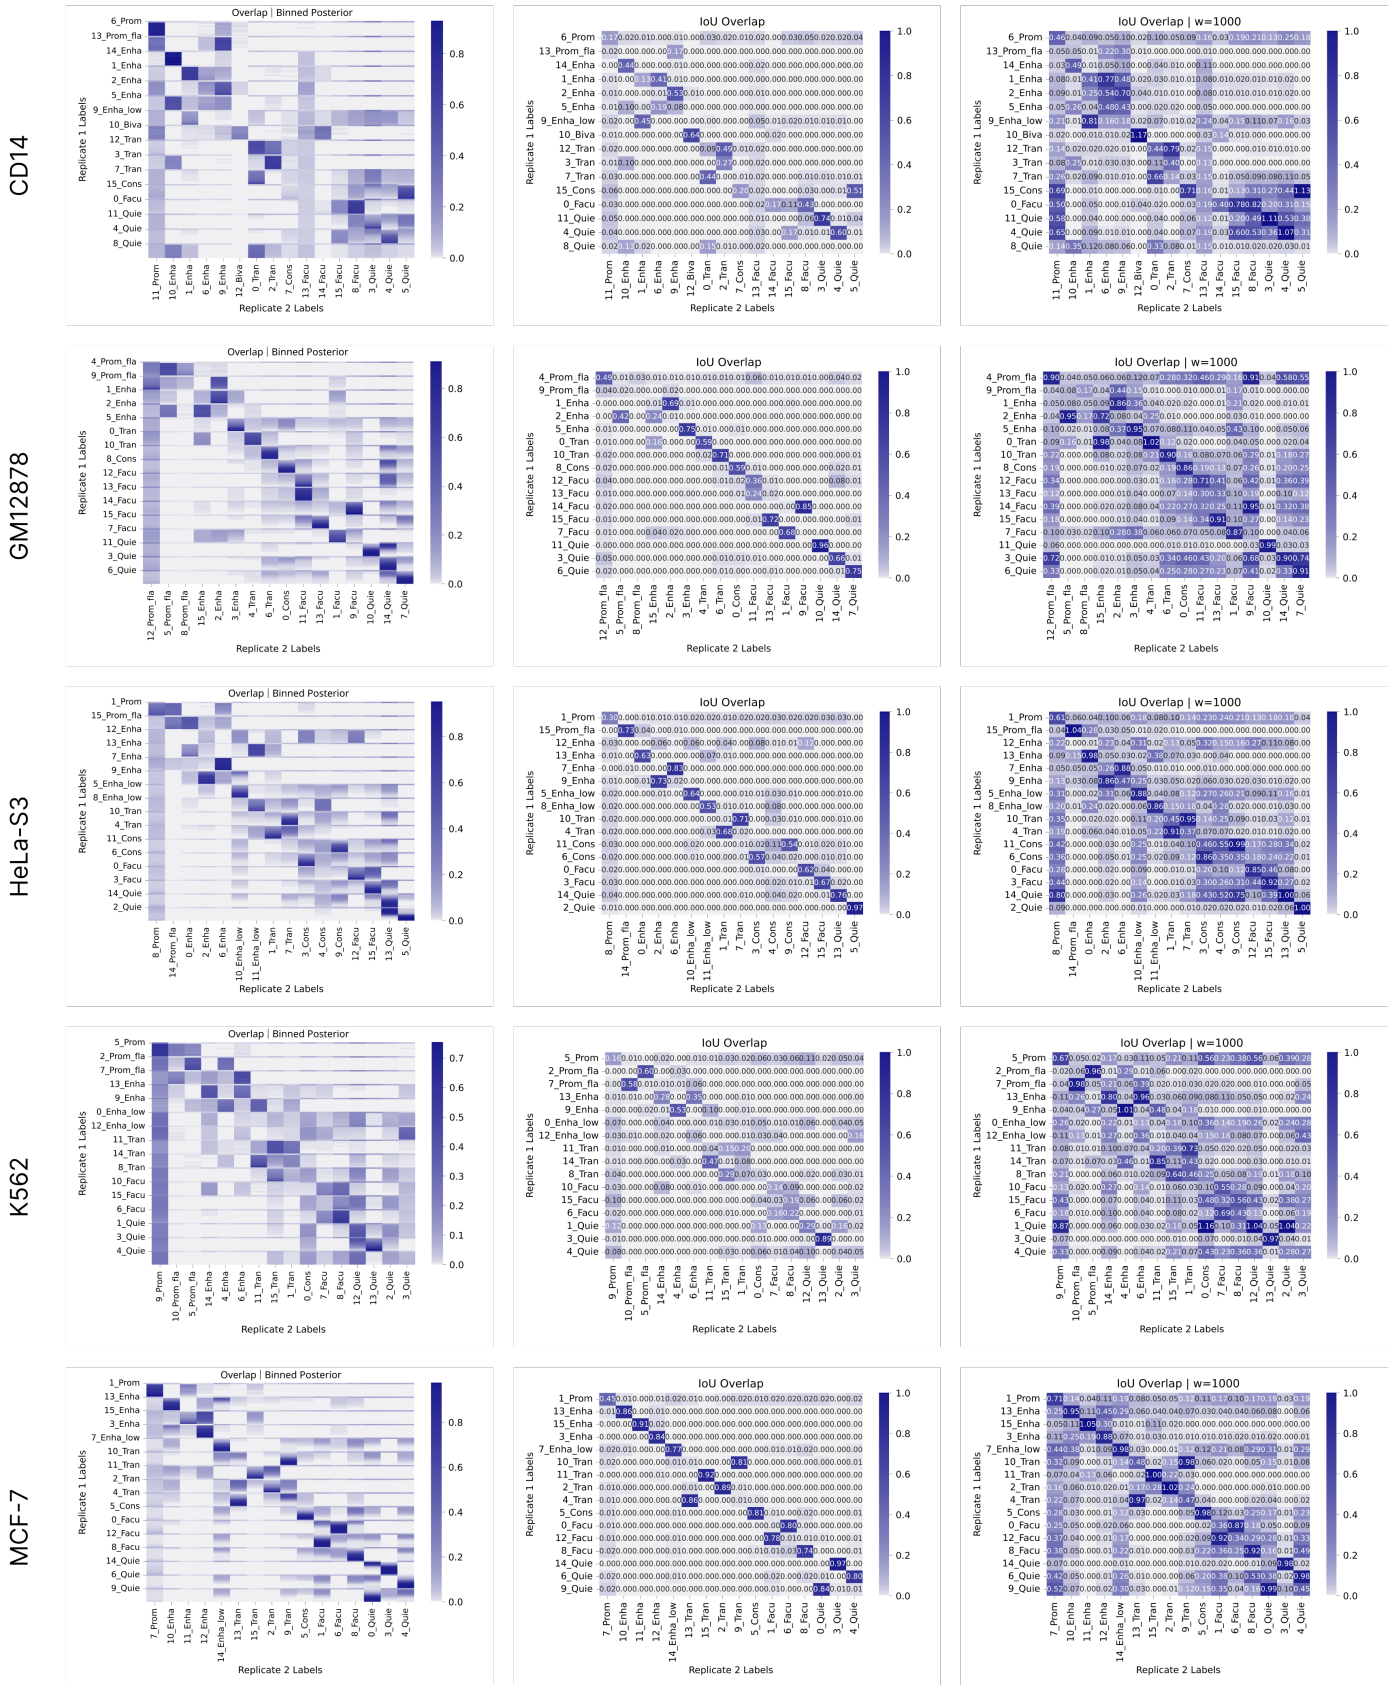

Figure 6: Intersection over union (IoU) overlap of Segway according to (Setting 3: Same Data, Different Models). Columns from left to right are binned posterior, IoU overlap with maximum-a-posterior state with  $w = 0$ , IoU overlap with maximum-a-posterior state with  $w = 1000$ . Color axis is linear and rows correspond to five cell types.



## 2.4 Overlap and emission similarity can identify corresponding states

# ChromHMM

CD14

GM12878

HeLa-S3

K562

MCF-7

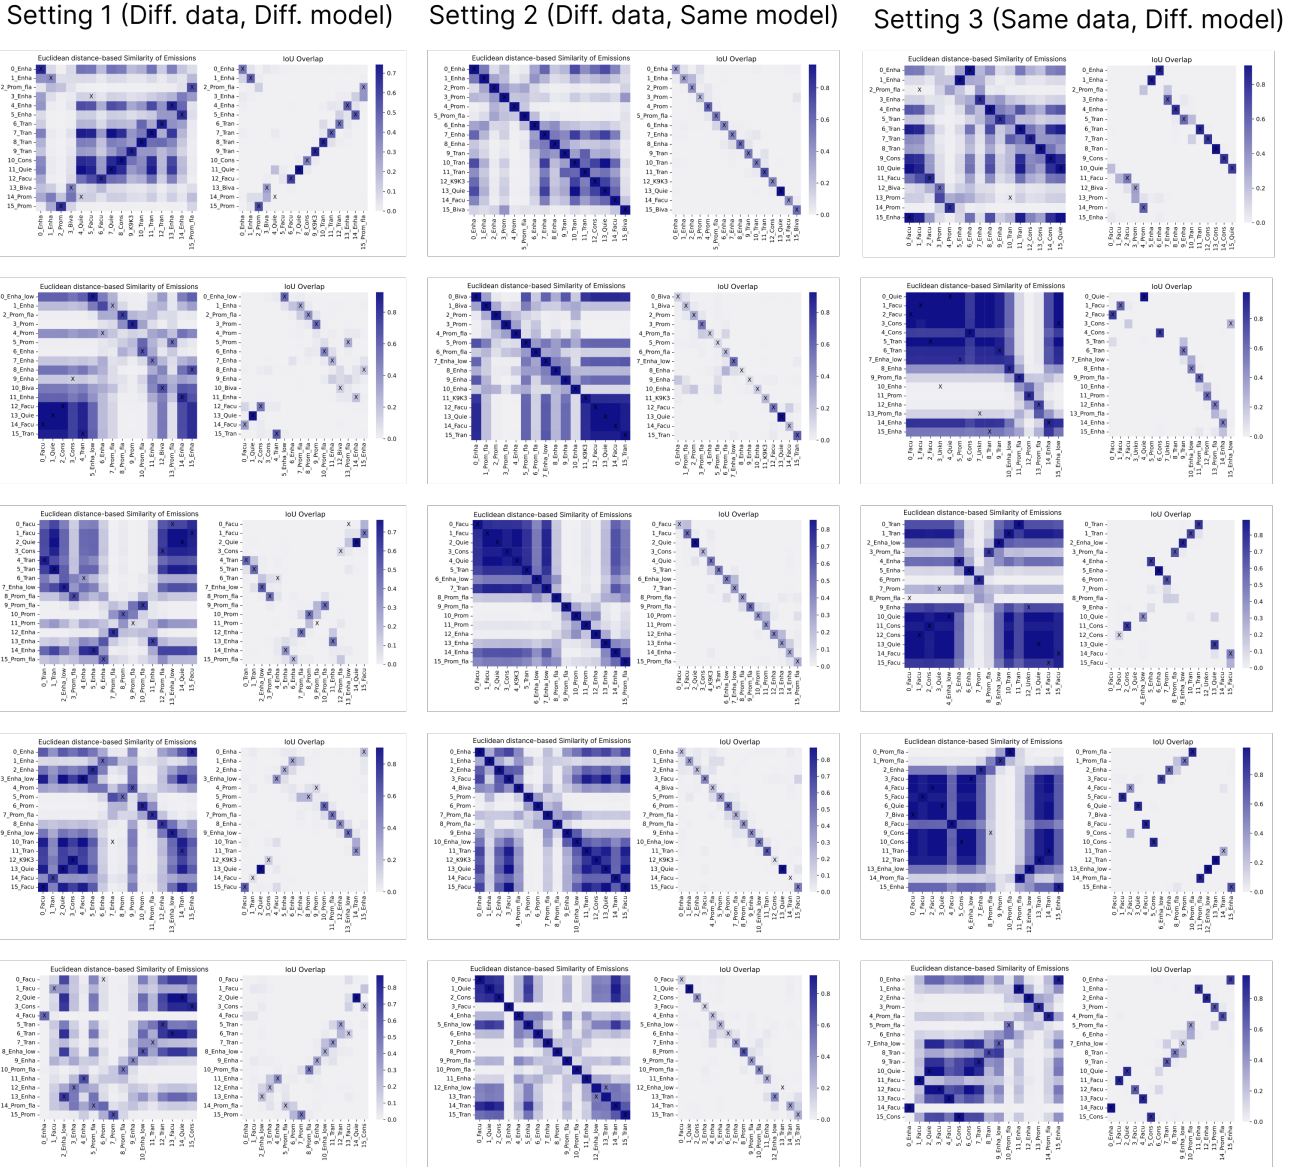

Figure 7: Two heatmaps for chromatin state similarity. The left heatmap illustrates the Euclidean distance-based similarity of emission probabilities of each pair of chromatin states in base and verification annotations. The right heatmap shows the pairwise intersection over union (IoU) of overlap for the same chromatin states. Identified corresponding states are marked with 'X'.

### 3 Chromatin states overlap differently across replicates

#### 3.1 Naive overlap

##### 3.1.1 ChromHMM

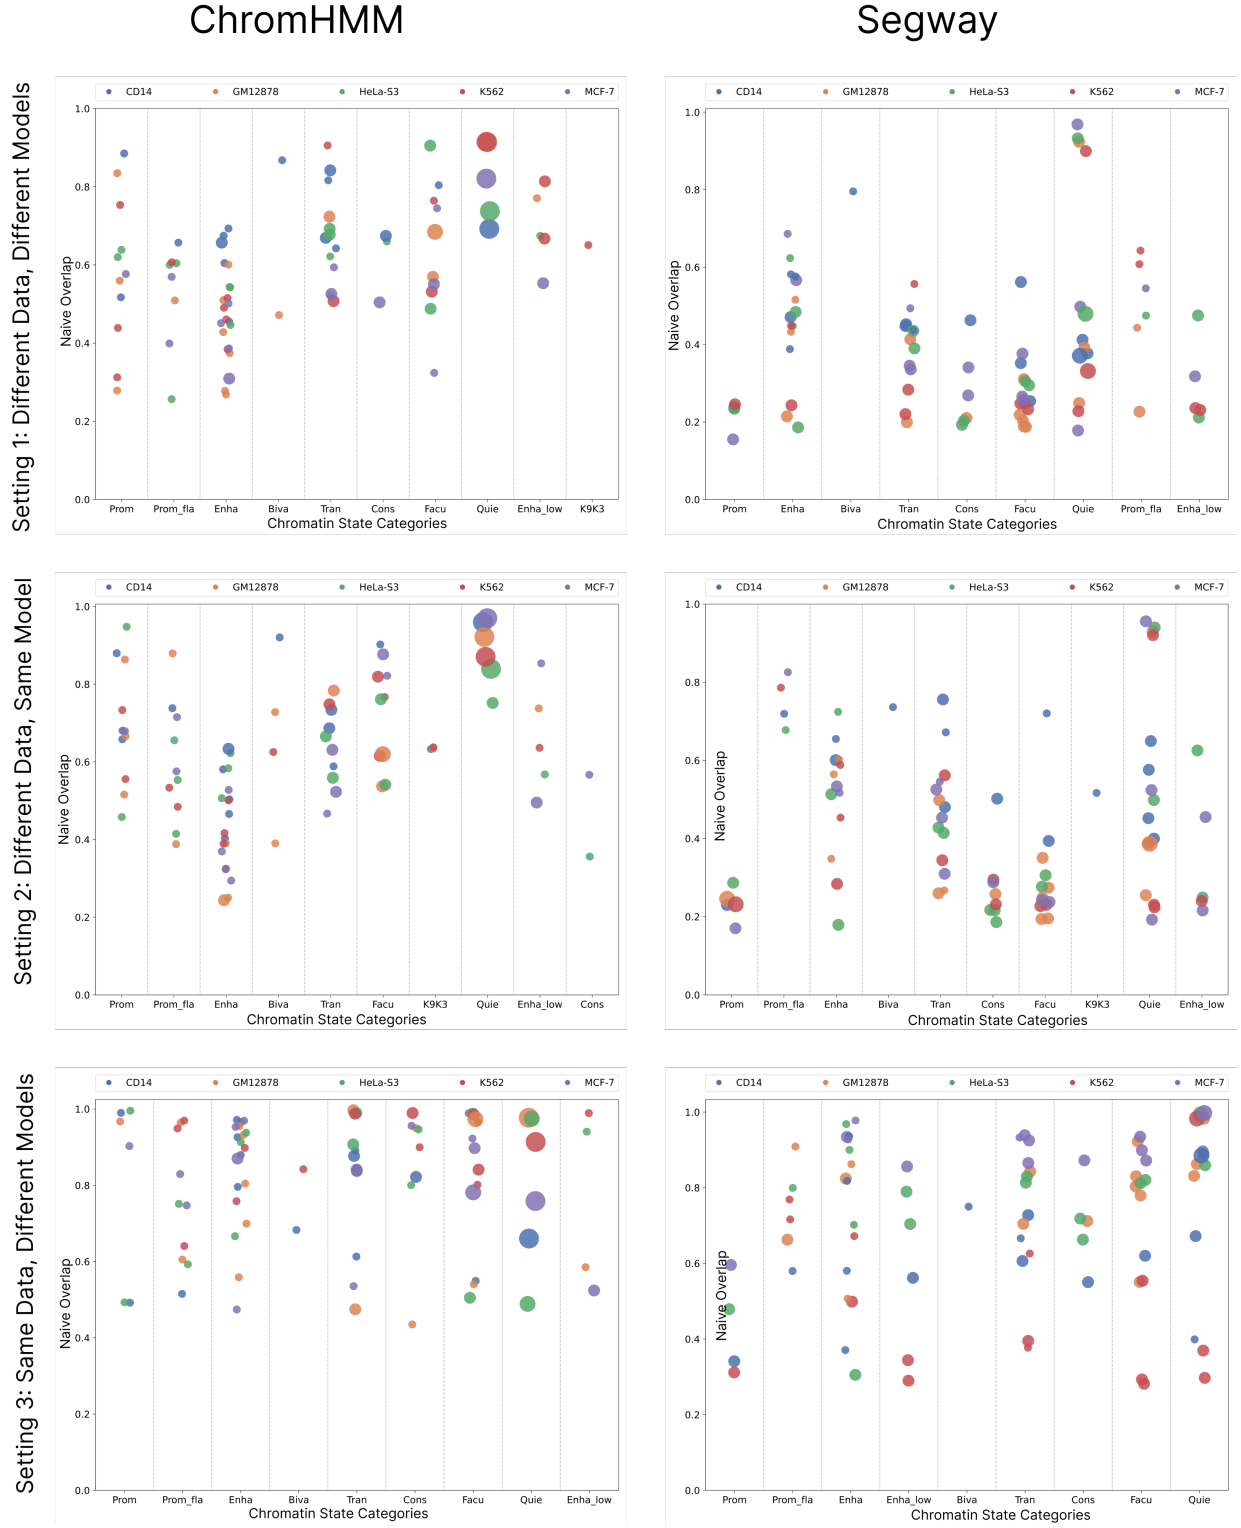

Figure 8: Fraction of overlap (Naive overlap) of various chromatin states categories identified in the ChromHMM and Segway annotation according to three settings for all five cell types. Each dot represents a chromatin state, with color denoting cell type and size proportional to genome coverage



## 3.2 Granularity of Chromatin States

### 3.2.1 ChromHMM

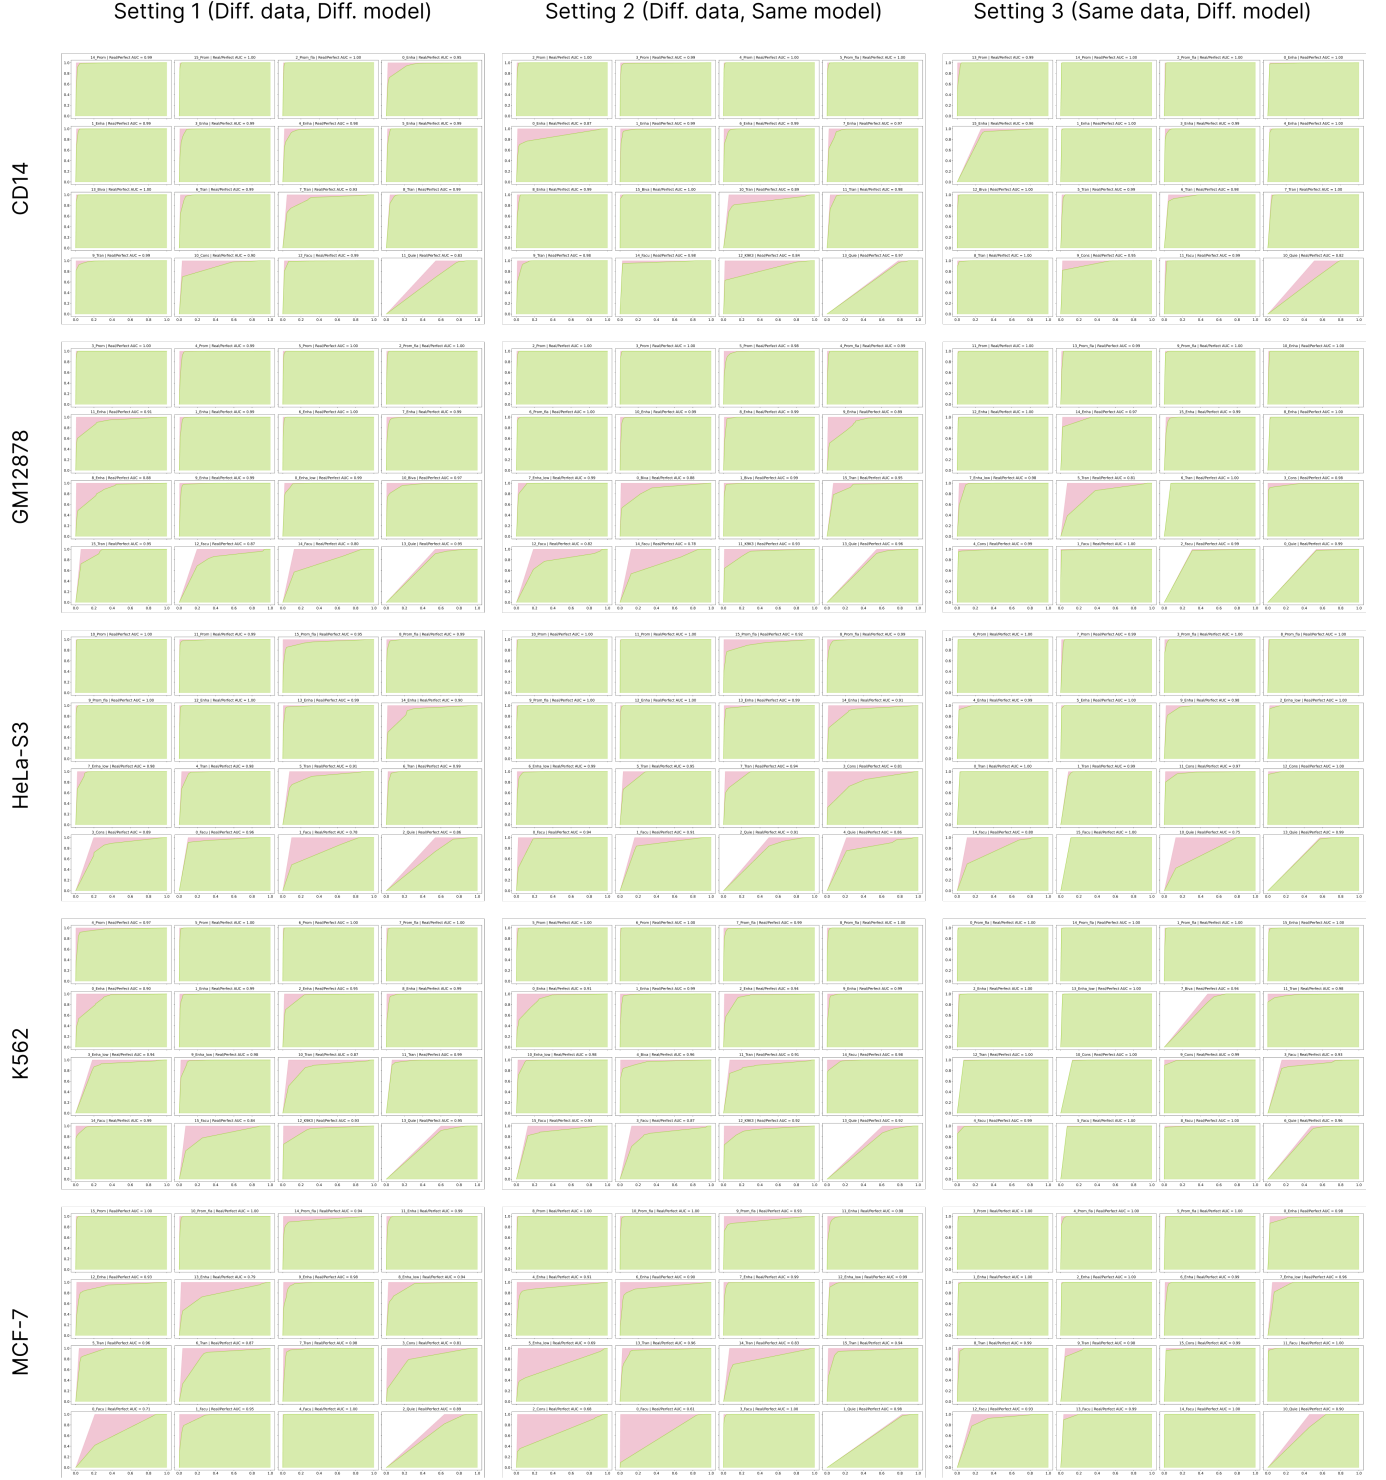

Figure 9: State merging curve for ChromHMM runs. Columns correspond to different settings and rows correspond to five cell types. The area under the state merging curve (auSMC) ratio is a numerical representation of chromatin state reproducibility as a function of chromatin state granularity which is calculated by dividing the observed AUC by the AUC pertaining to the perfect reproducibility case.

### 3.2.2 Segway

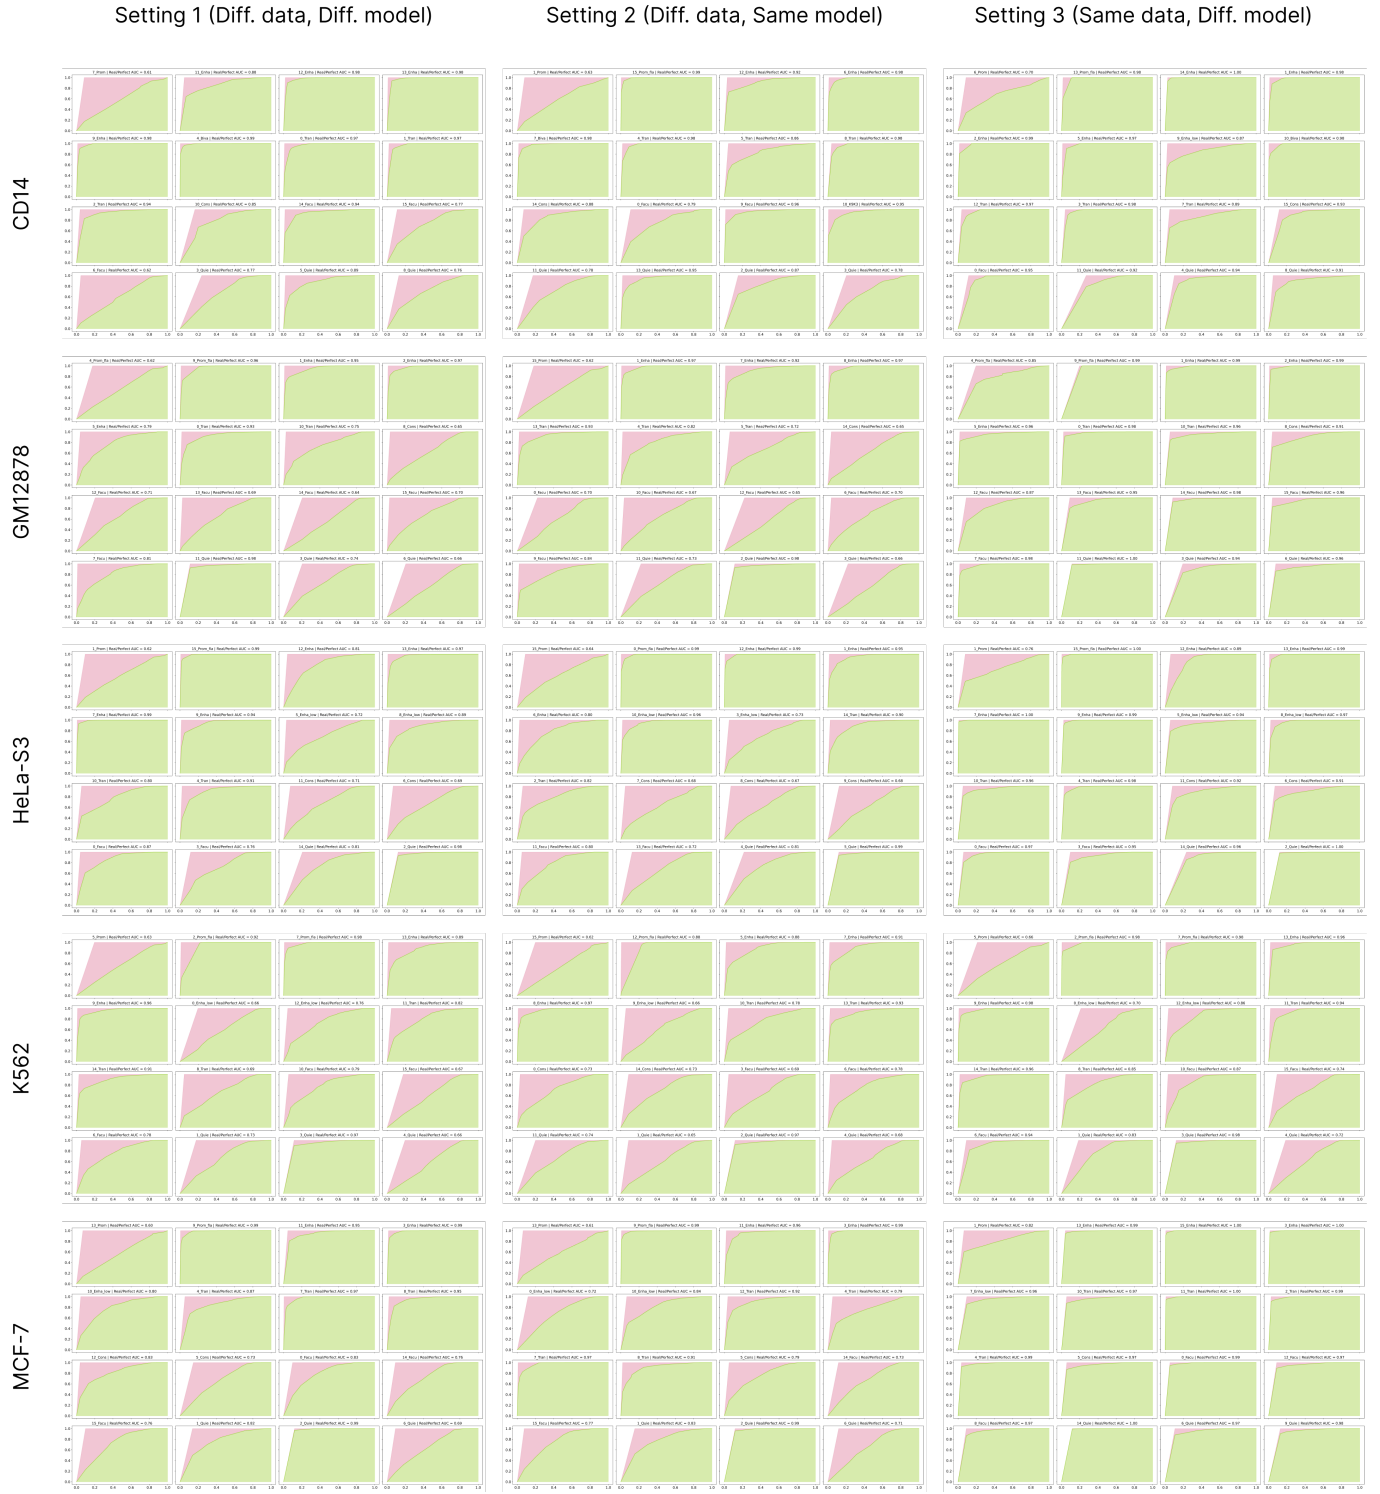

Figure 10: State merging curve for Segway runs. Columns correspond to different settings and rows correspond to five cell types. The area under the state merging curve (auSMC) ratio is a numerical representation of chromatin state reproducibility as a function of chromatin state granularity which is calculated by dividing the observed AUC by the AUC pertaining to the perfect reproducibility case.

### 3.3 Area under state merging curve (auSMC) for various genomic functions

#### 3.3.1 ChromHMM

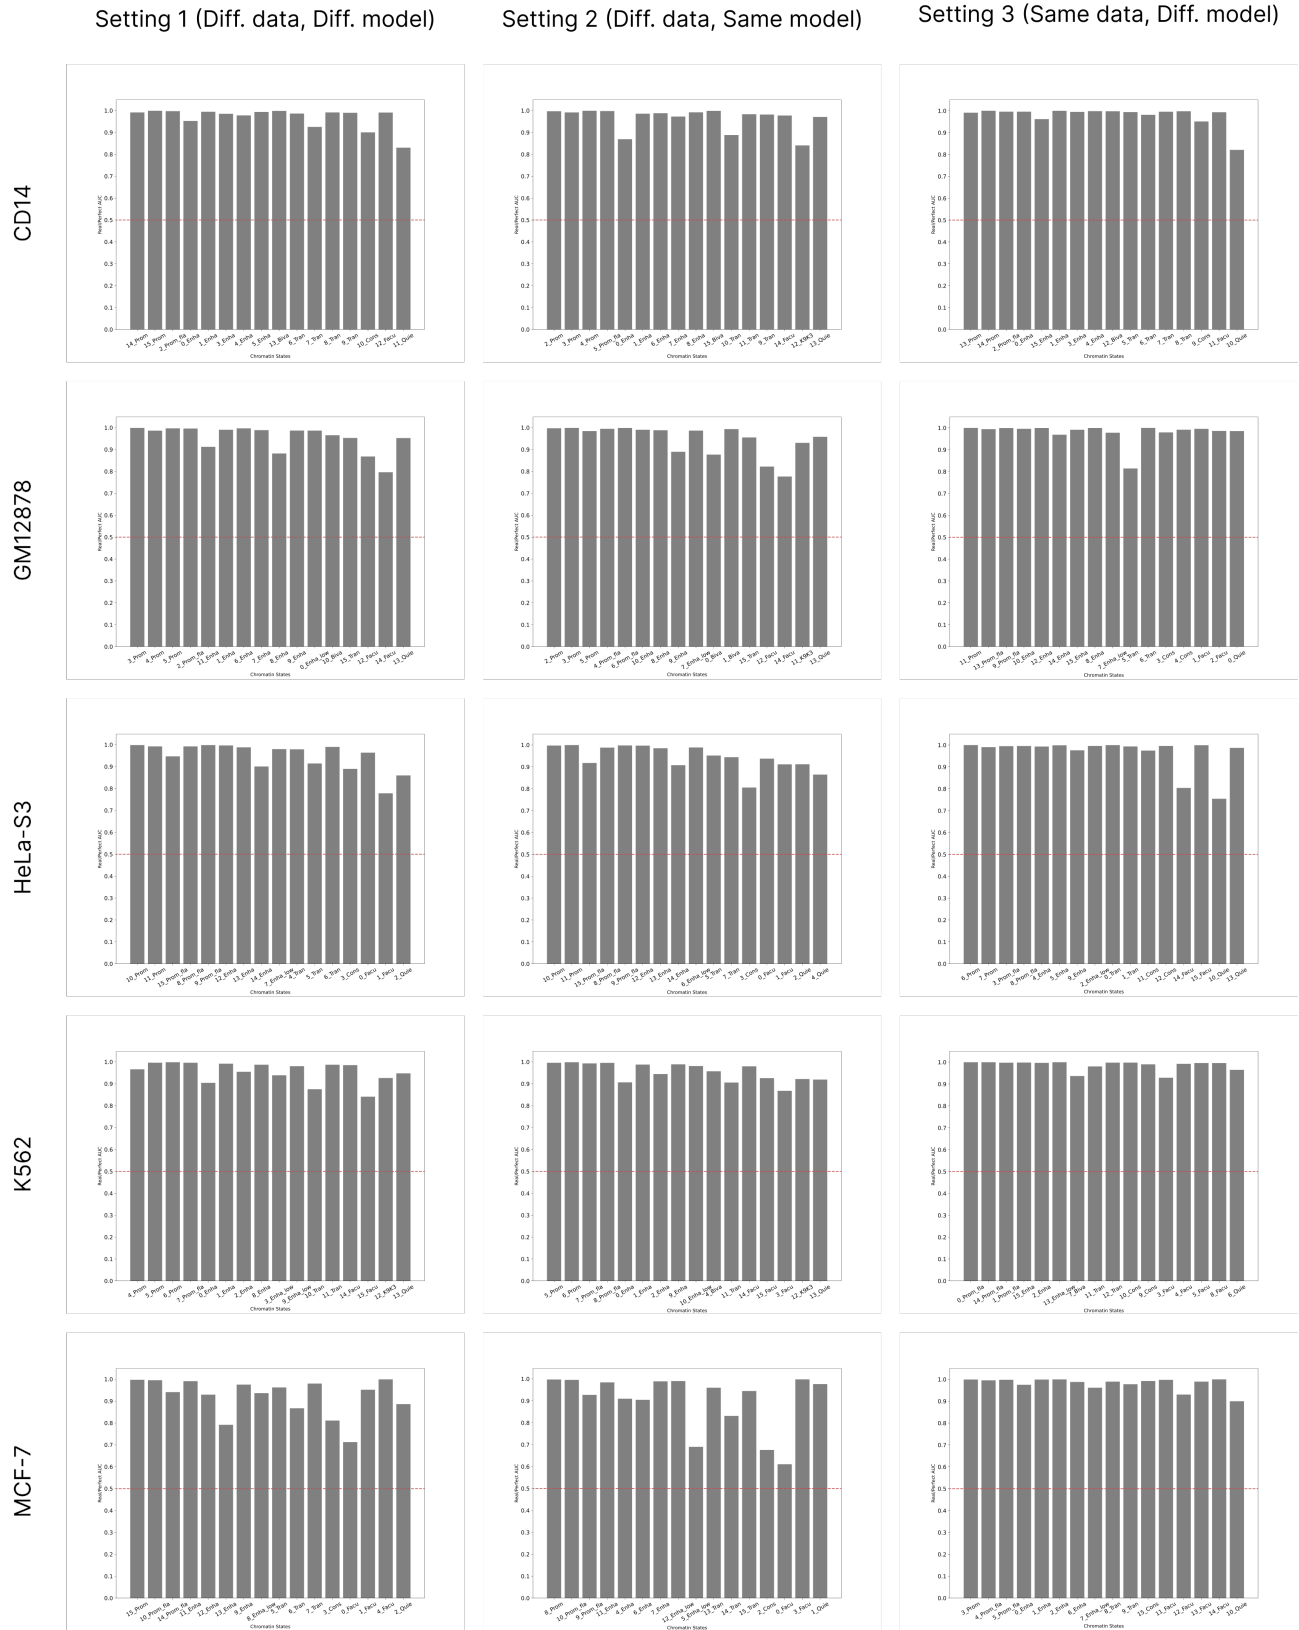

Figure 11: The auSMC ratio of chromatin states in the base ChromHMM annotations. Rows correspond to different cell types and columns correspond to different settings of variability.

### 3.3.2 Segway

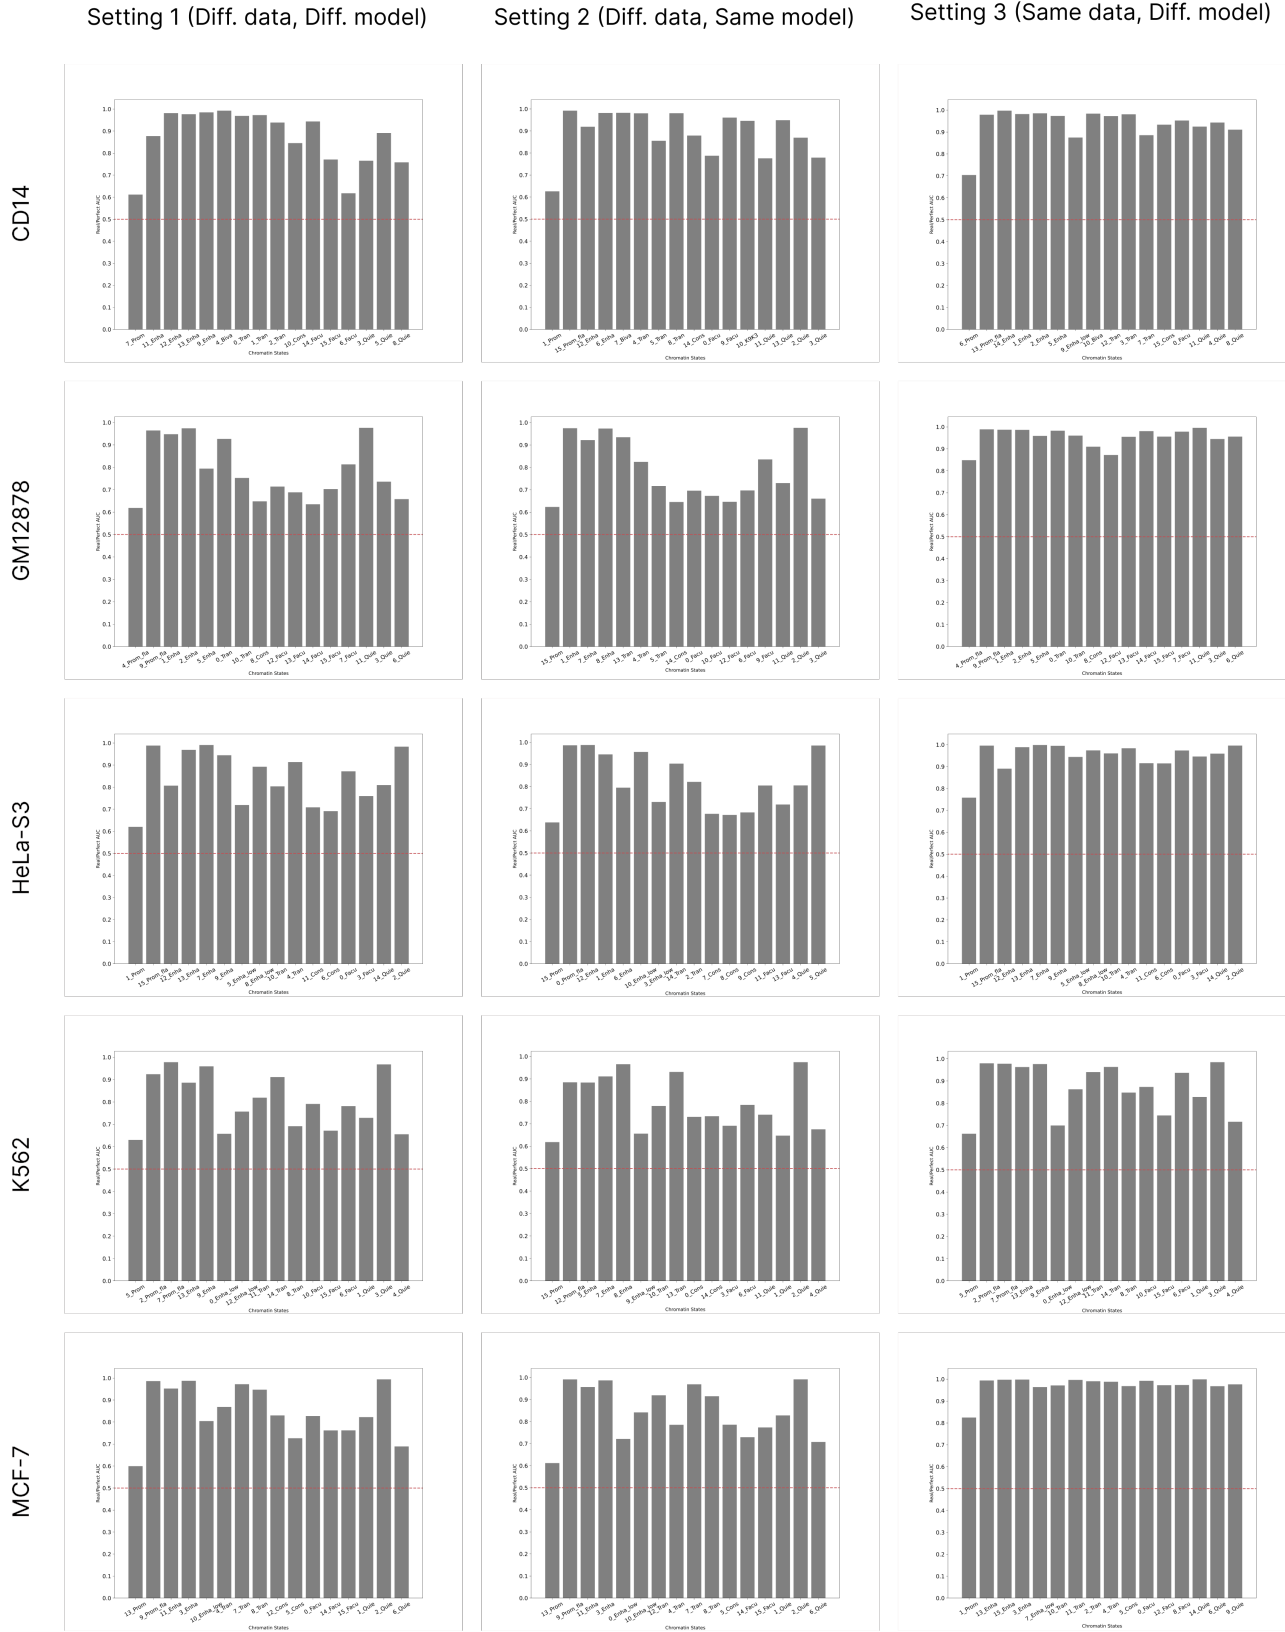

Figure 12: The auSMC ratio of chromatin states in the base Segway annotations. Rows correspond to different cell types and columns correspond to different settings of variability.

3.3.3 Area under state merging curve (auSMC) chromatin state categories

ChromHMM

Segway

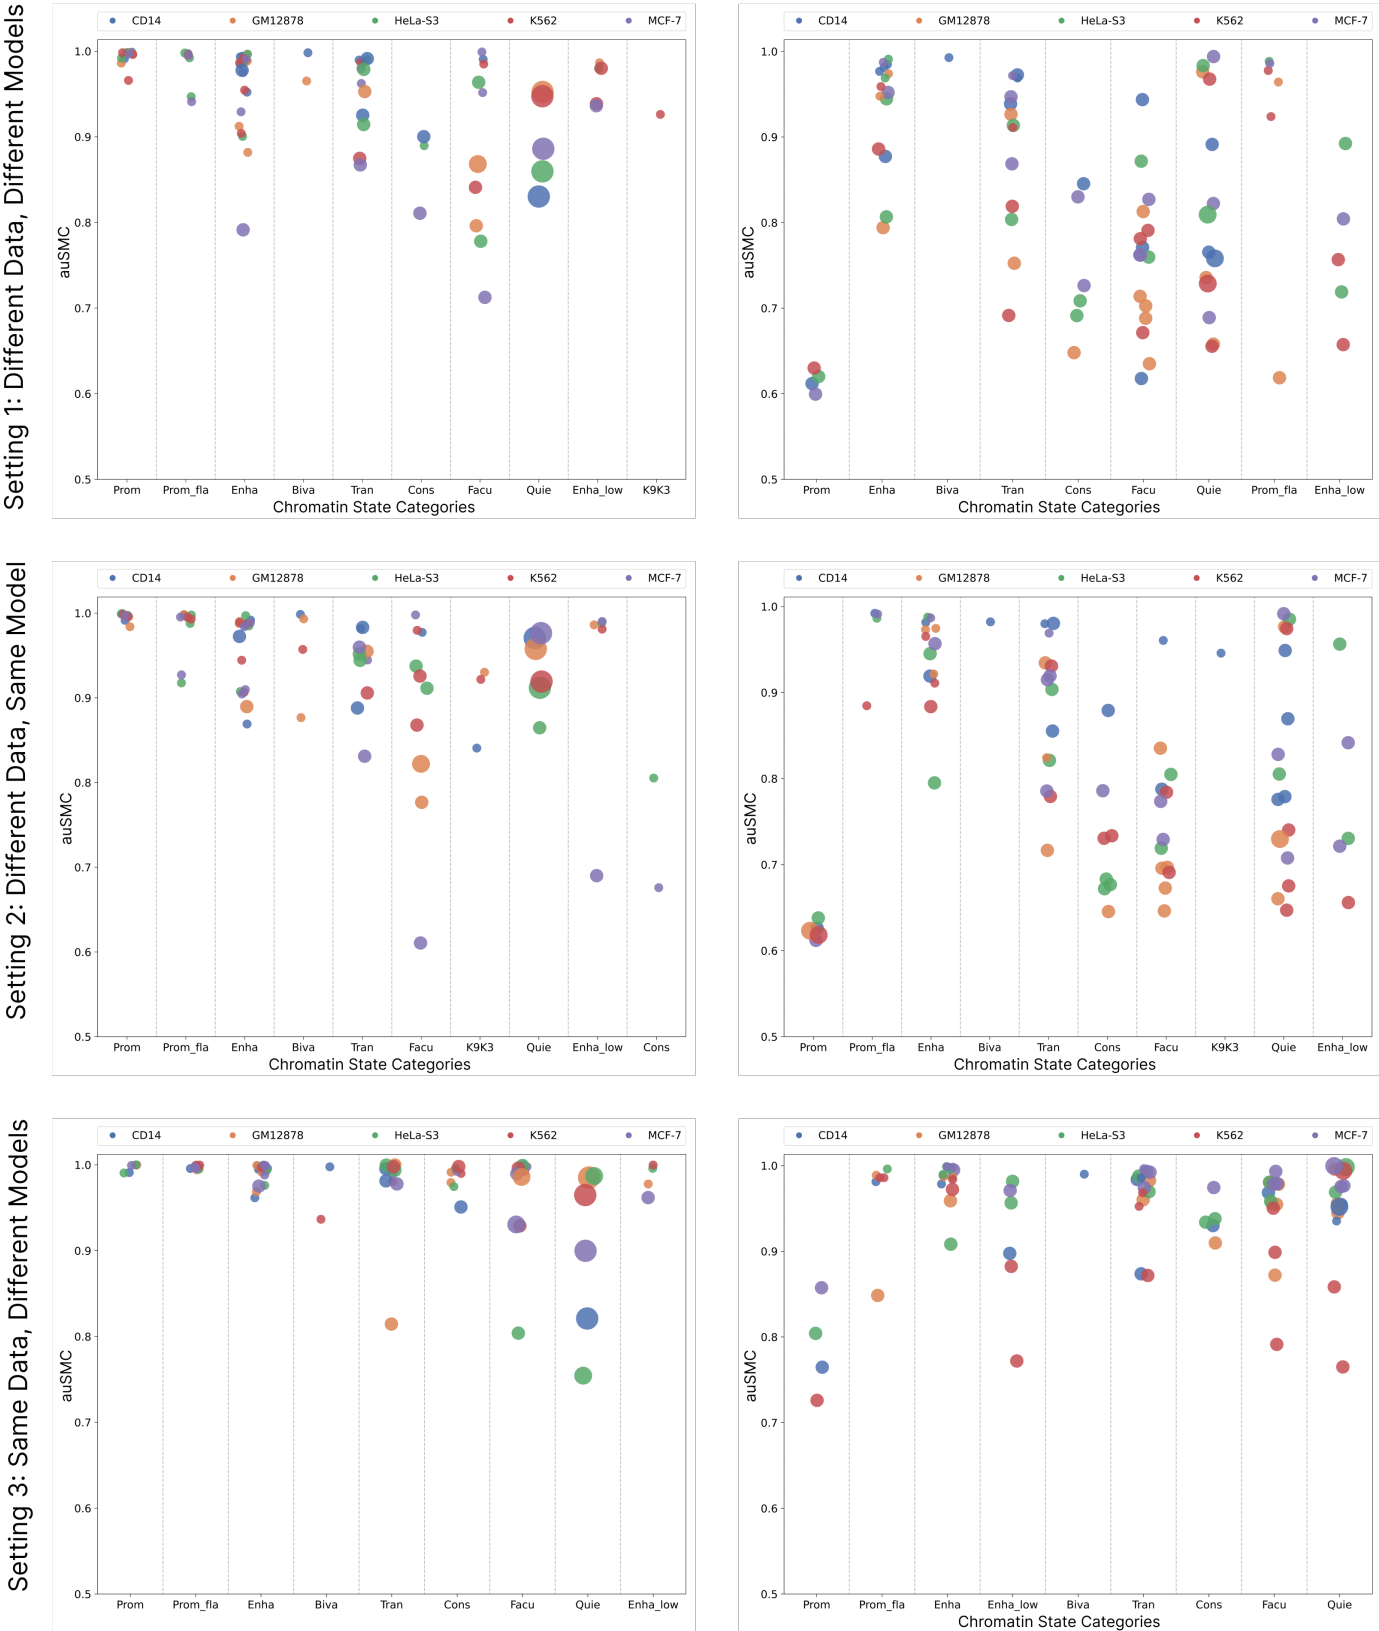

Figure 13: auSMC ratio of various chromatin states categories identified in the ChromHMM (left column) and Segway (right column) annotation according to three settings of variability (rows) for five cell types. Each dot represents a chromatin state, with color denoting cell type and size proportional to genome coverage.

## 3.4 Post-Clustering

### 3.4.1 Mutual Information

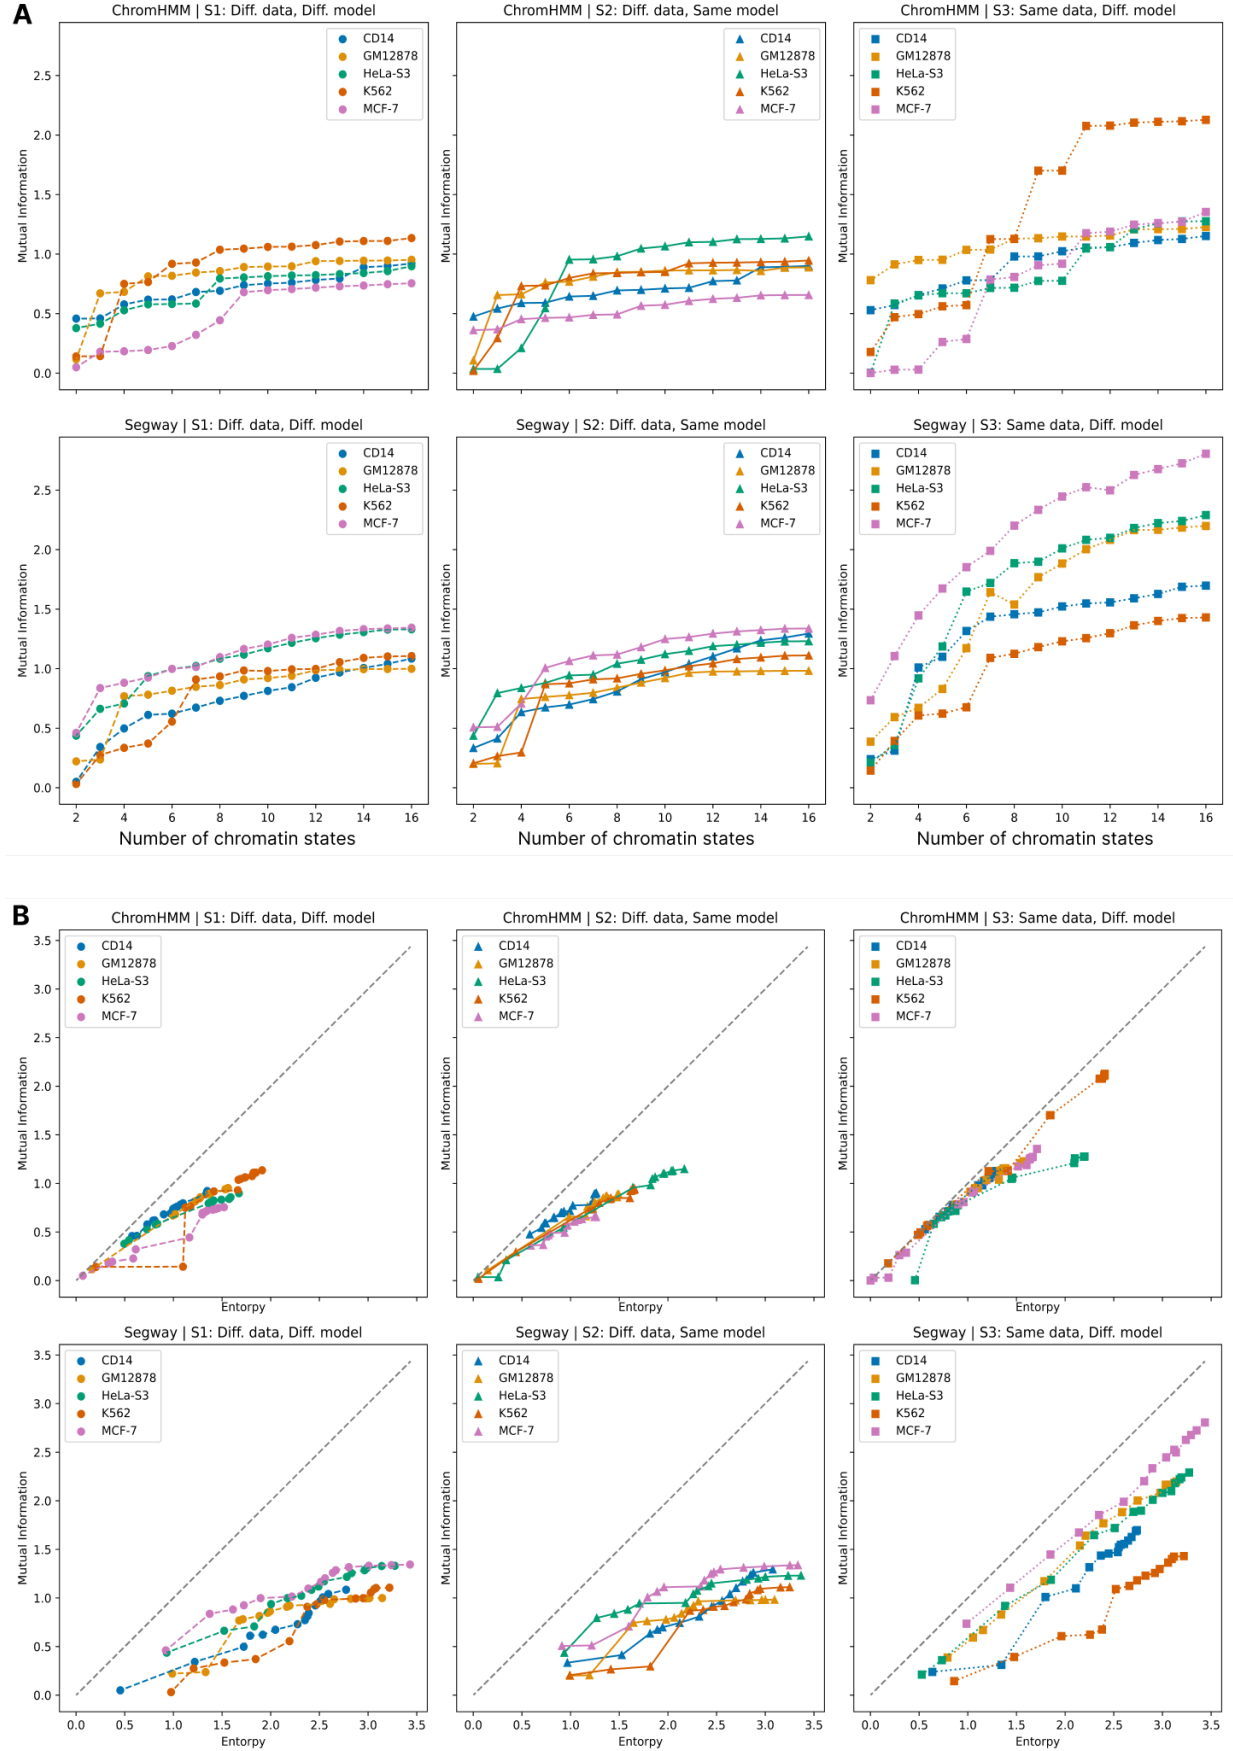

Figure 14: **(A)** Mutual information as a function of number of states of annotations measured during the post-clustering process. **(B)** Mutual information as a function of entropy of annotations measured during the post-clustering process.

### 3.4.2 Average r-value

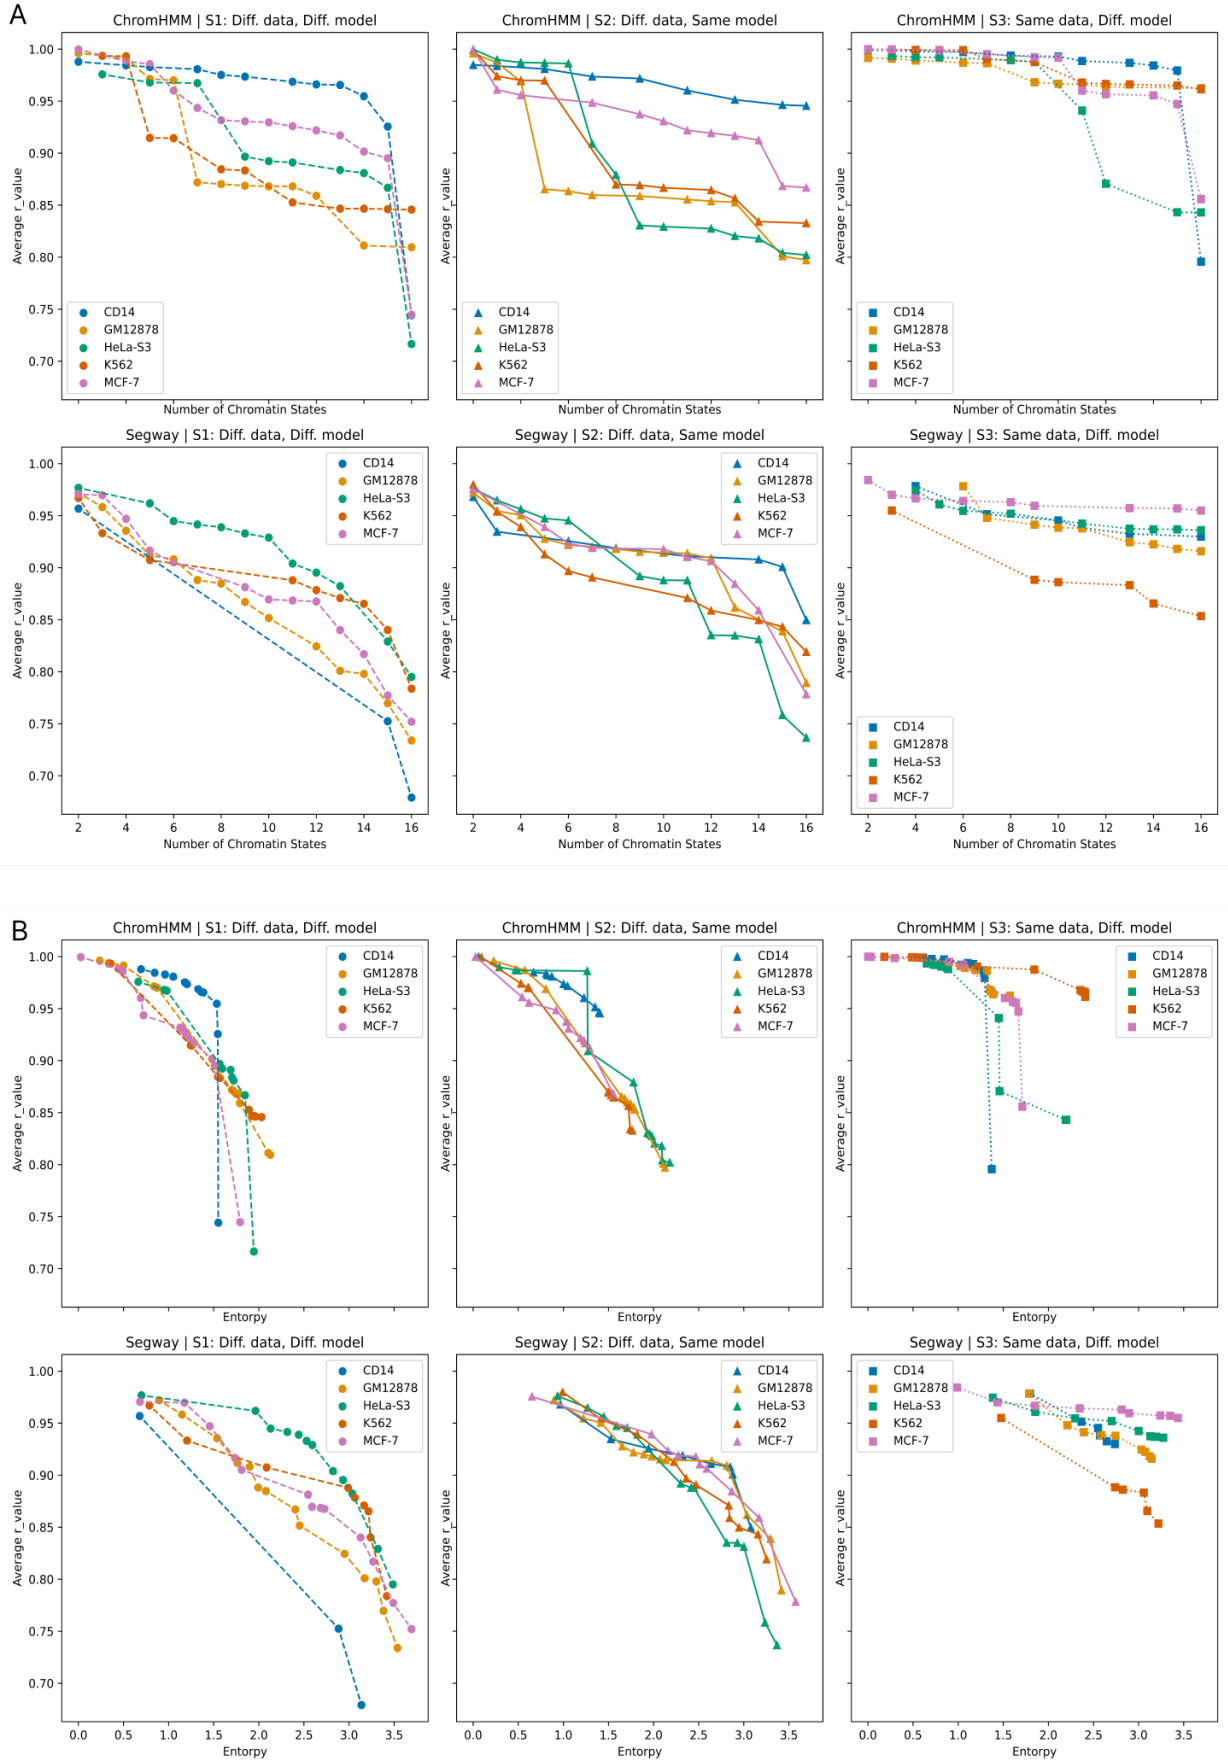

Figure 15: **(A)** Average r-value as a function of number of states of annotations measured during the post-clustering process. **(B)** Average r-value as a function of entropy of annotations measured during the post-clustering process.

### 3.4.3 Fraction of confident genomic regions

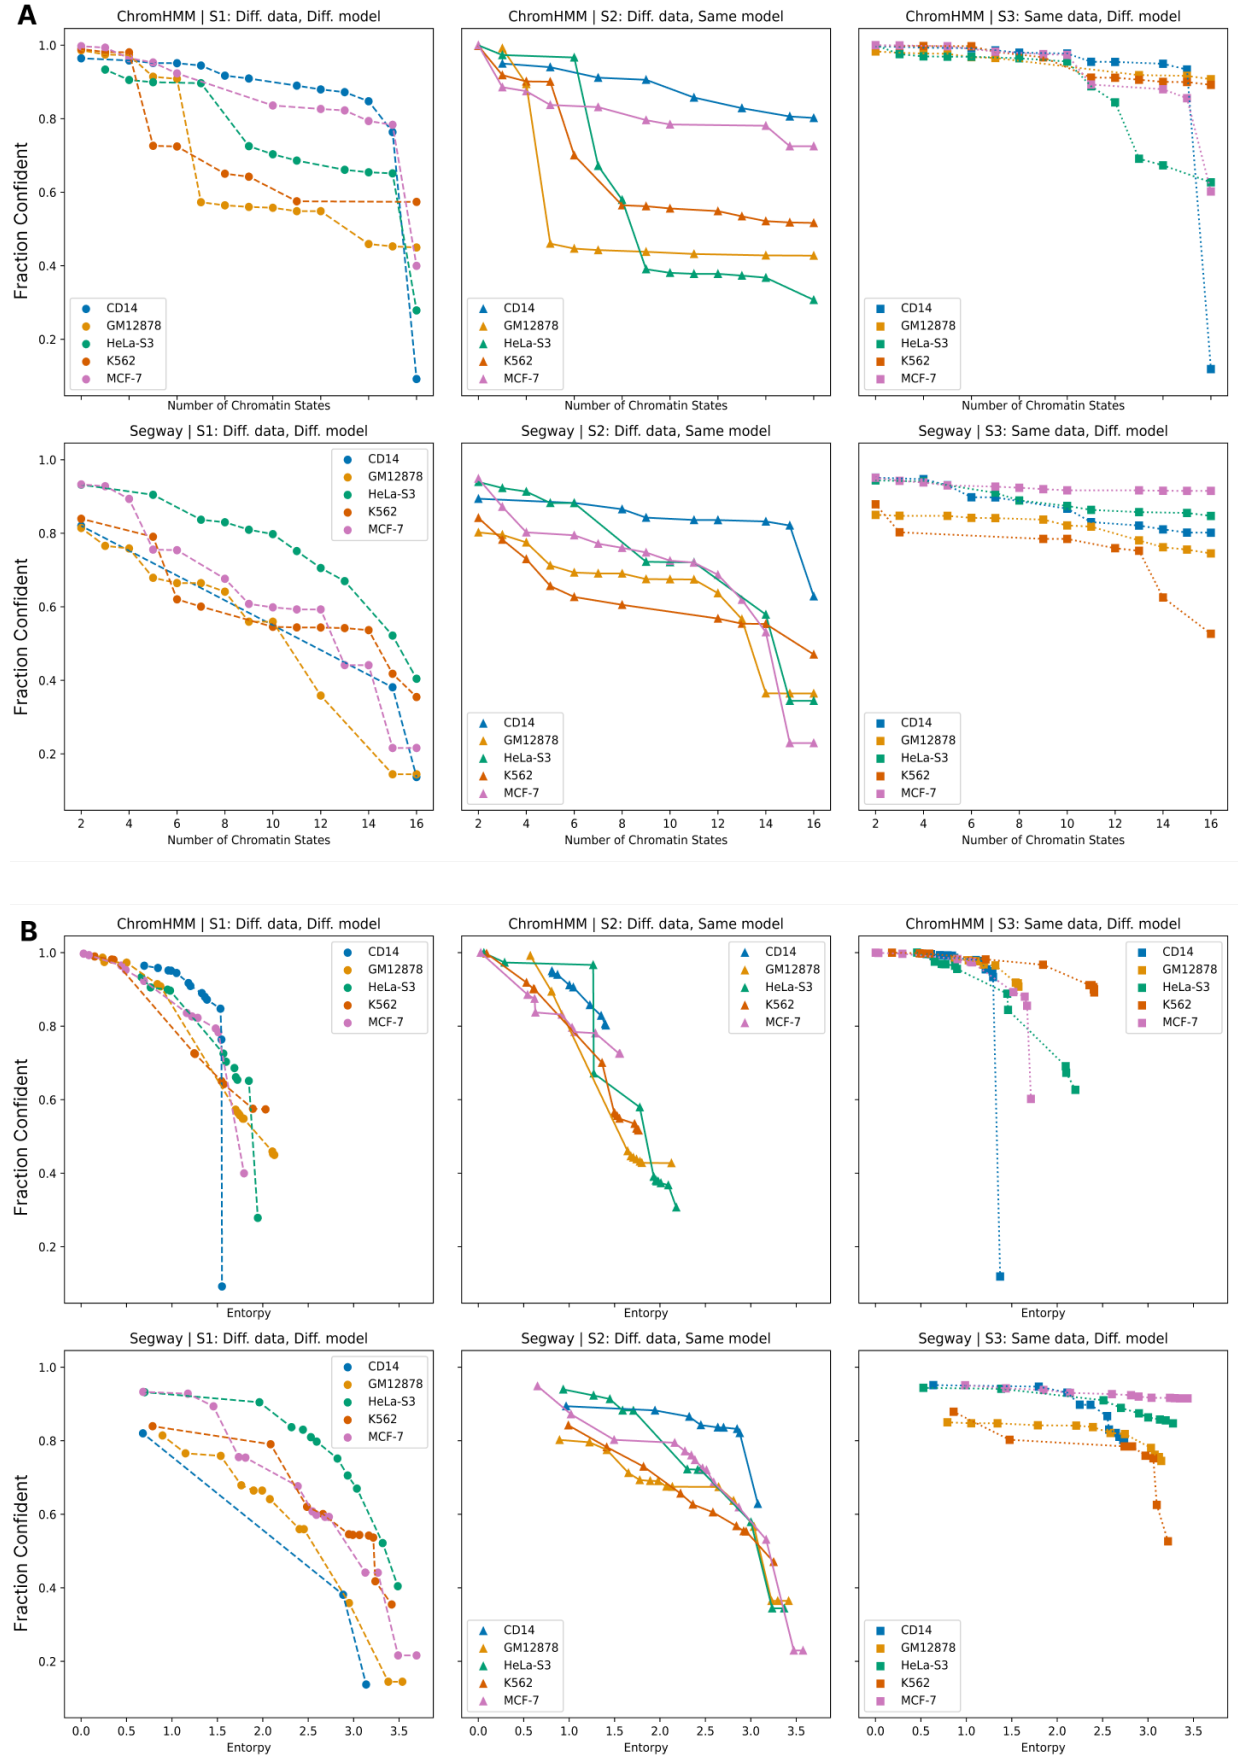

Figure 16: **(A)** Fraction of confident genomic regions as a function of number of states of annotations measured during the post-clustering process. **(B)** Fraction of confident genomic regions as a function of entropy of annotations measured during the post-clustering process.



# 4 Corresponding chromatin states occur at proximity of each other across replicates

## 4.1 Overlap as a function of $w$

### 4.1.1 ChromHMM

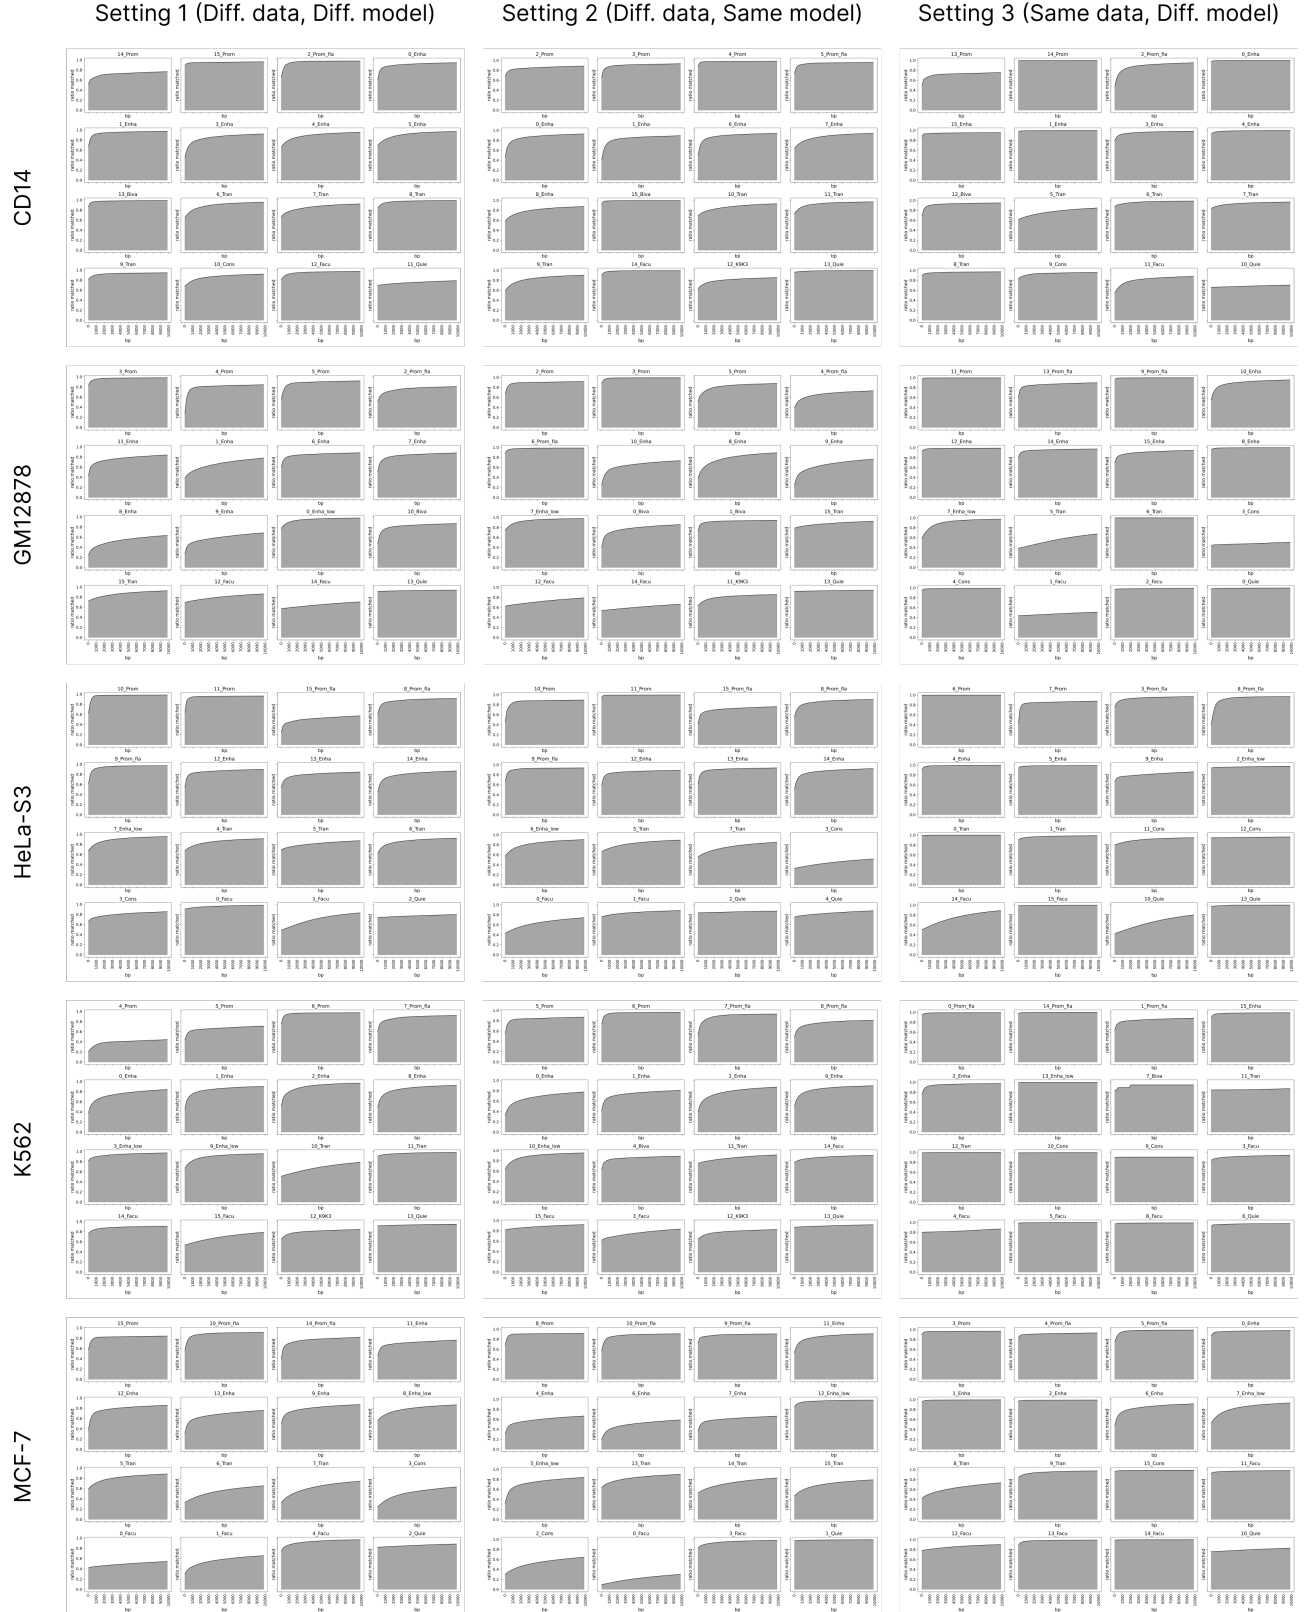

Figure 17: The fraction of each state in base annotation that is overlapped with a corresponding state within a  $w$ -sized distance upstream or downstream in ChromHMM. Rows correspond to different cell types and columns correspond to settings of variability.

## 4.1.2 Segway

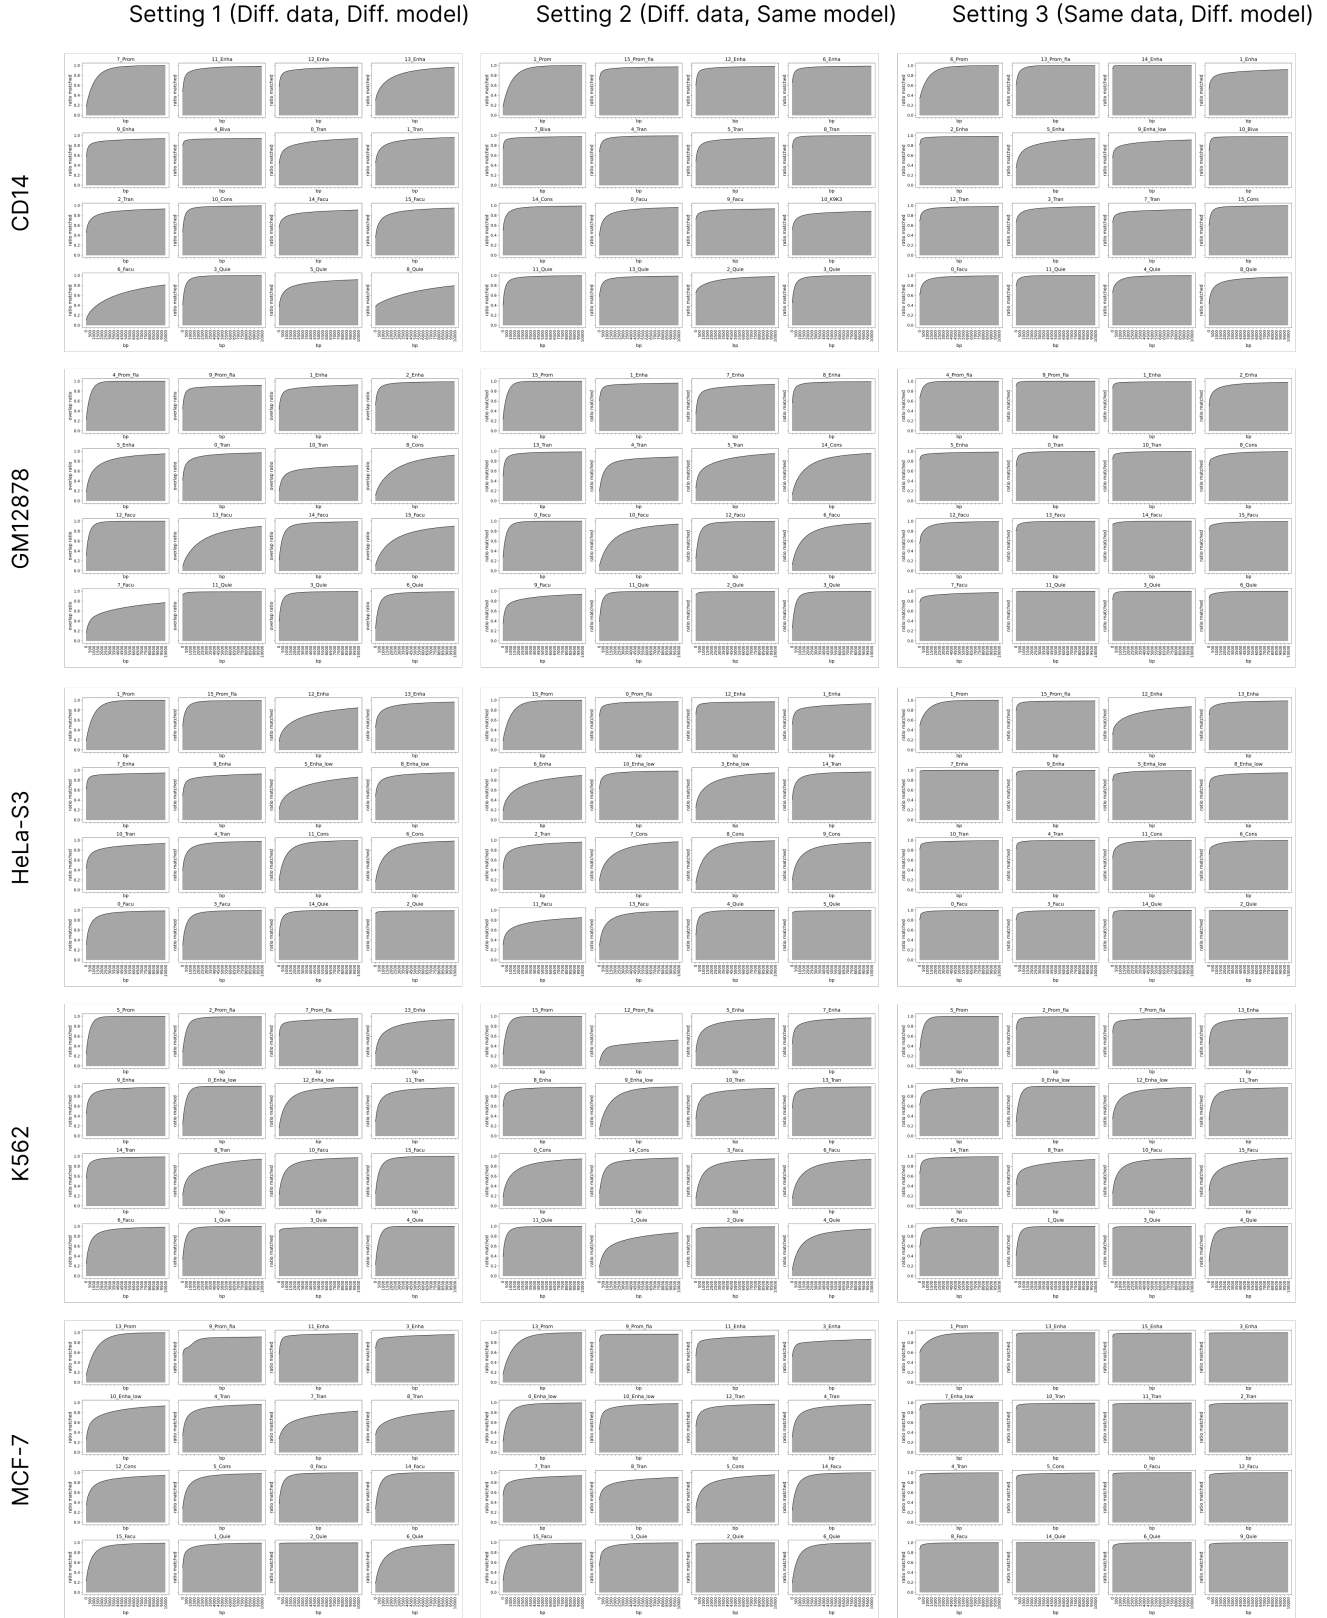

Figure 18: The fraction of each state in base annotation that is overlapped with a corresponding state within a  $w$ -sized distance upstream or downstream in Segway. Rows correspond to different cell types and columns correspond to settings of variability.

## 4.2 Correspondence as a function of $w$

### 4.2.1 ChromHMM

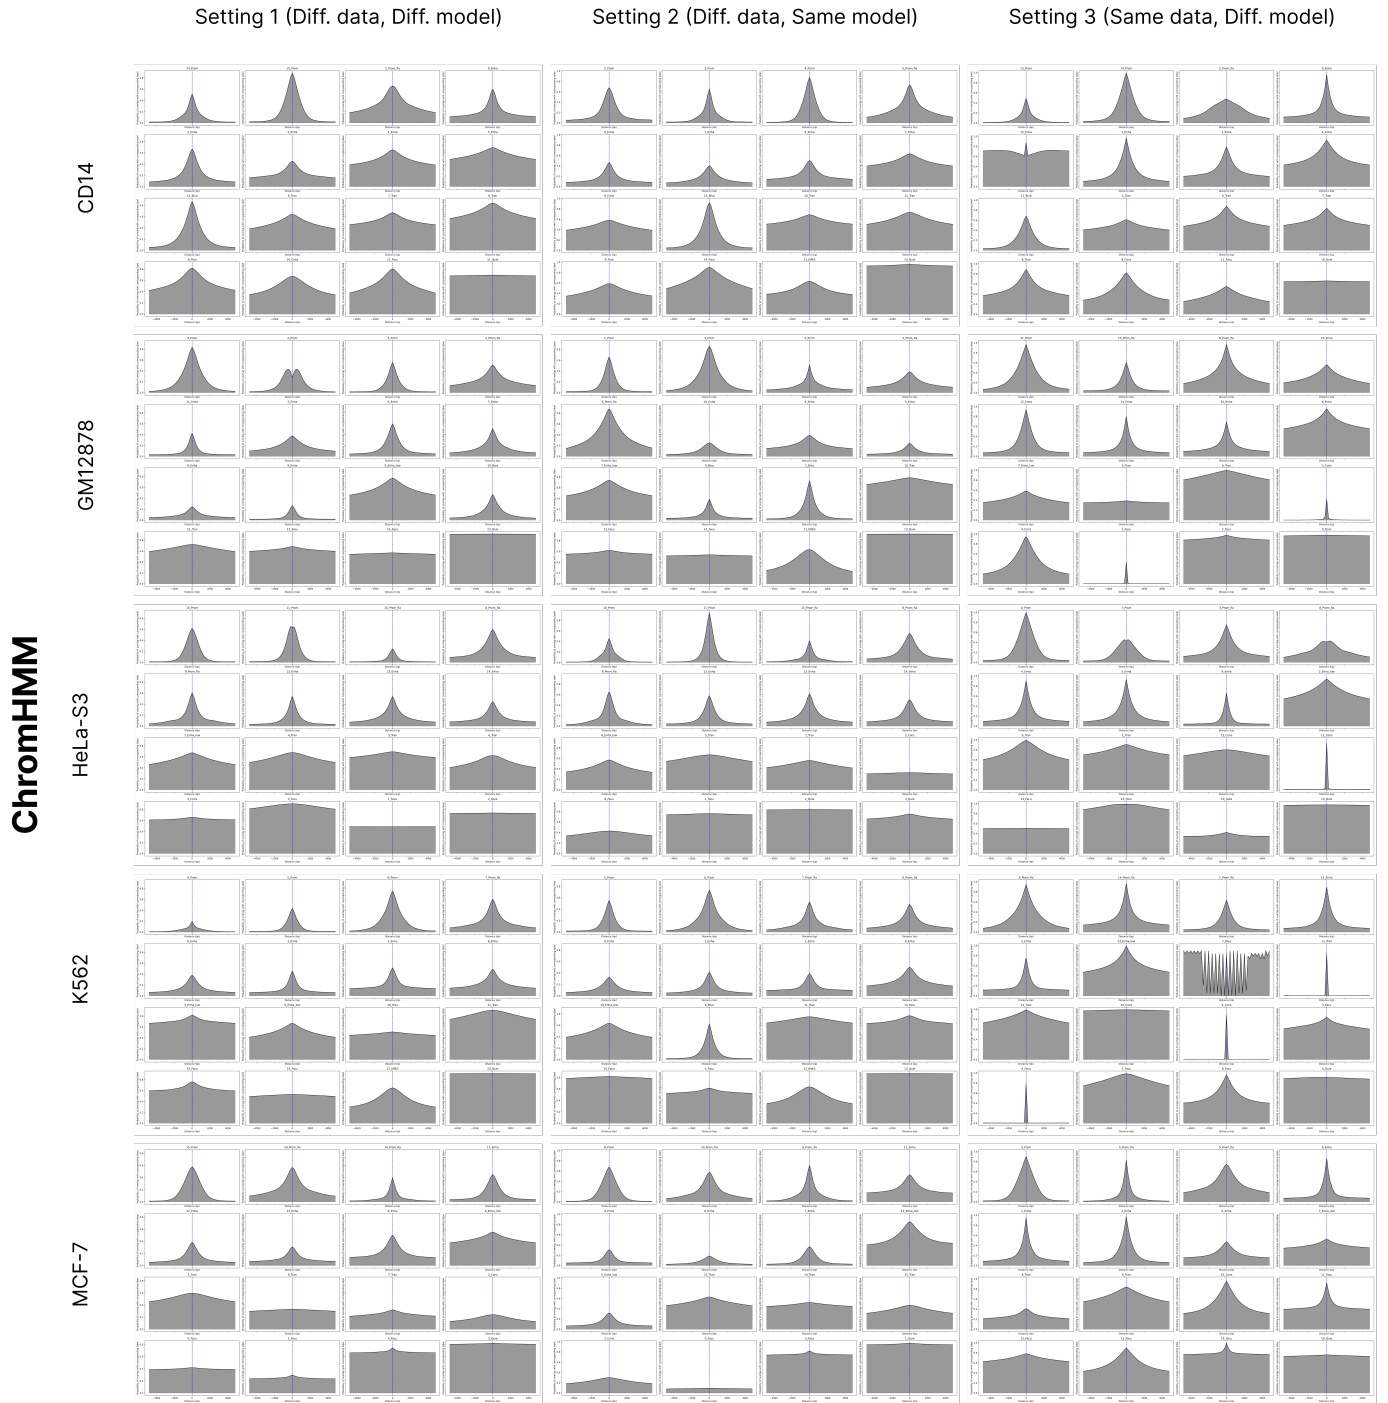

Figure 19: At each position in the genome, the probability of overlap with the corresponding state decreases as a function of distance from the position. Rows correspond to different cell types and columns correspond to settings of variability.

## 4.2.2 Segway

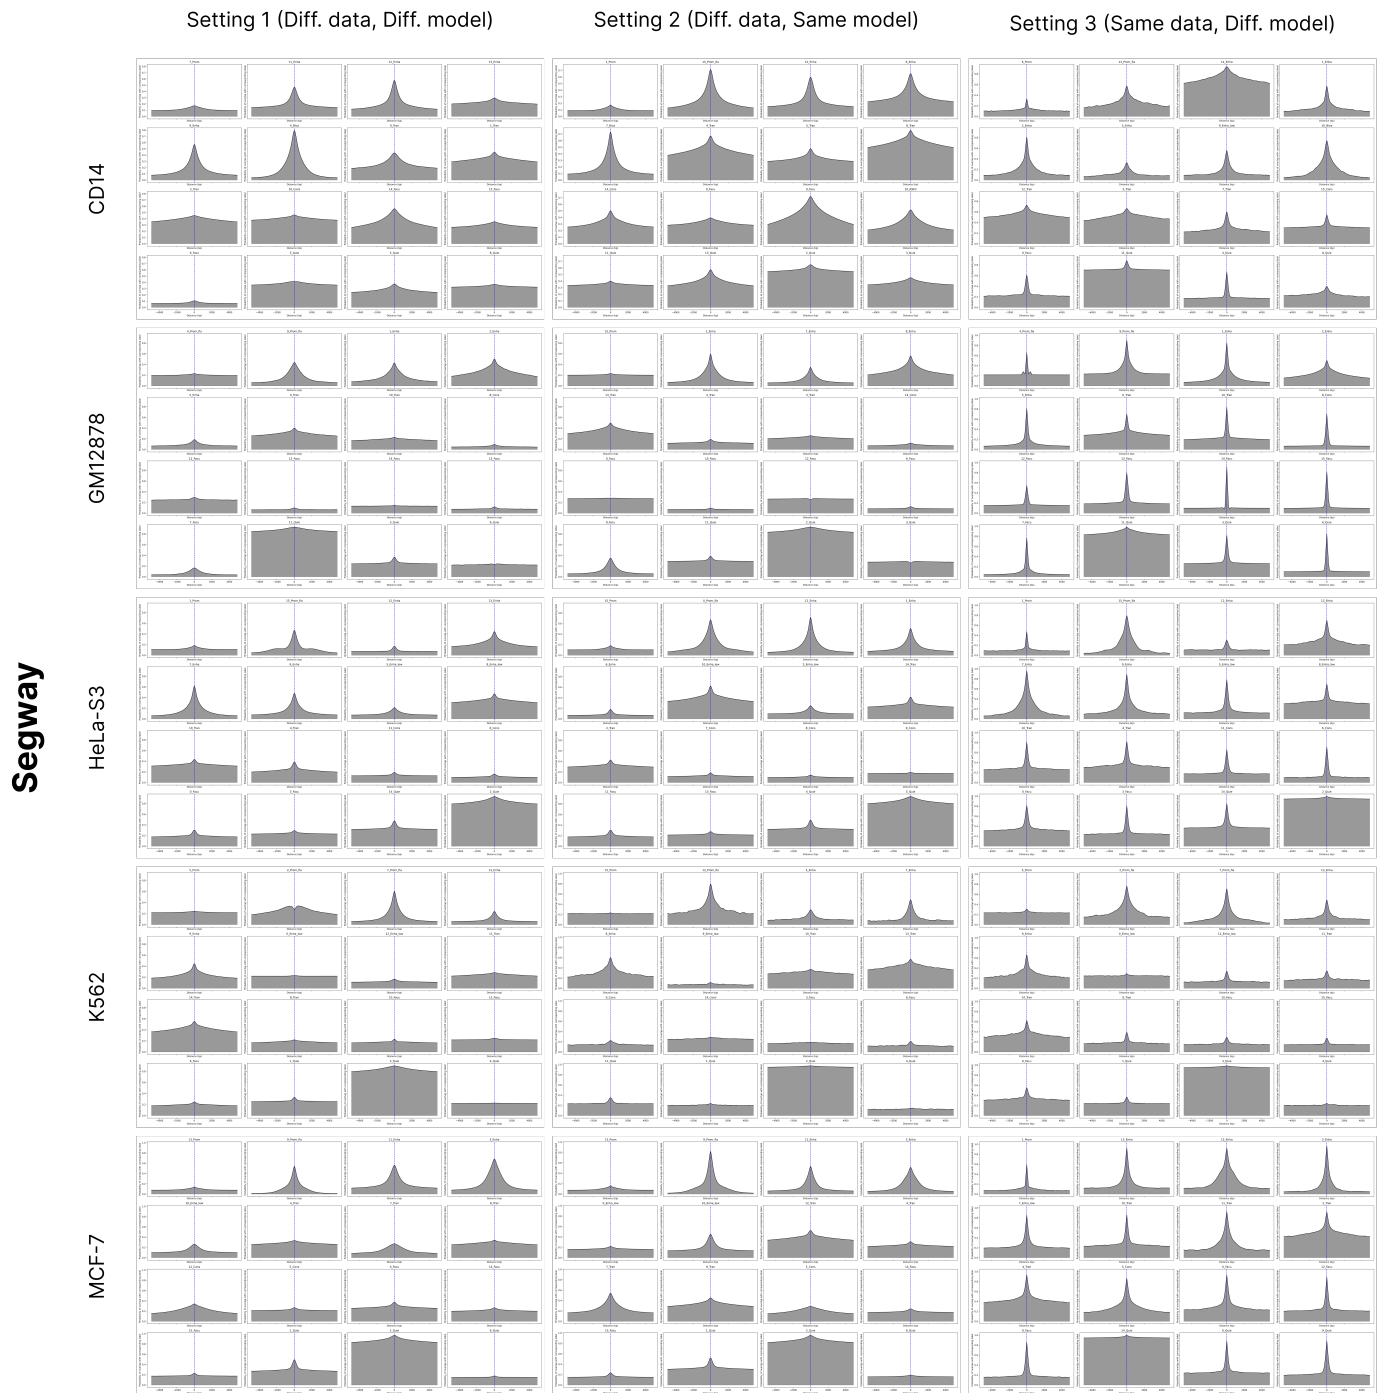

Figure 20: At each position in the genome, the probability of overlap with the corresponding state decreases as a function of distance from the position. Rows correspond to different cell types and columns correspond to settings of variability.

# 5 Posterior probability is associated with overlap

## 5.1 Calibration of posterior probability

### 5.1.1 ChromHMM

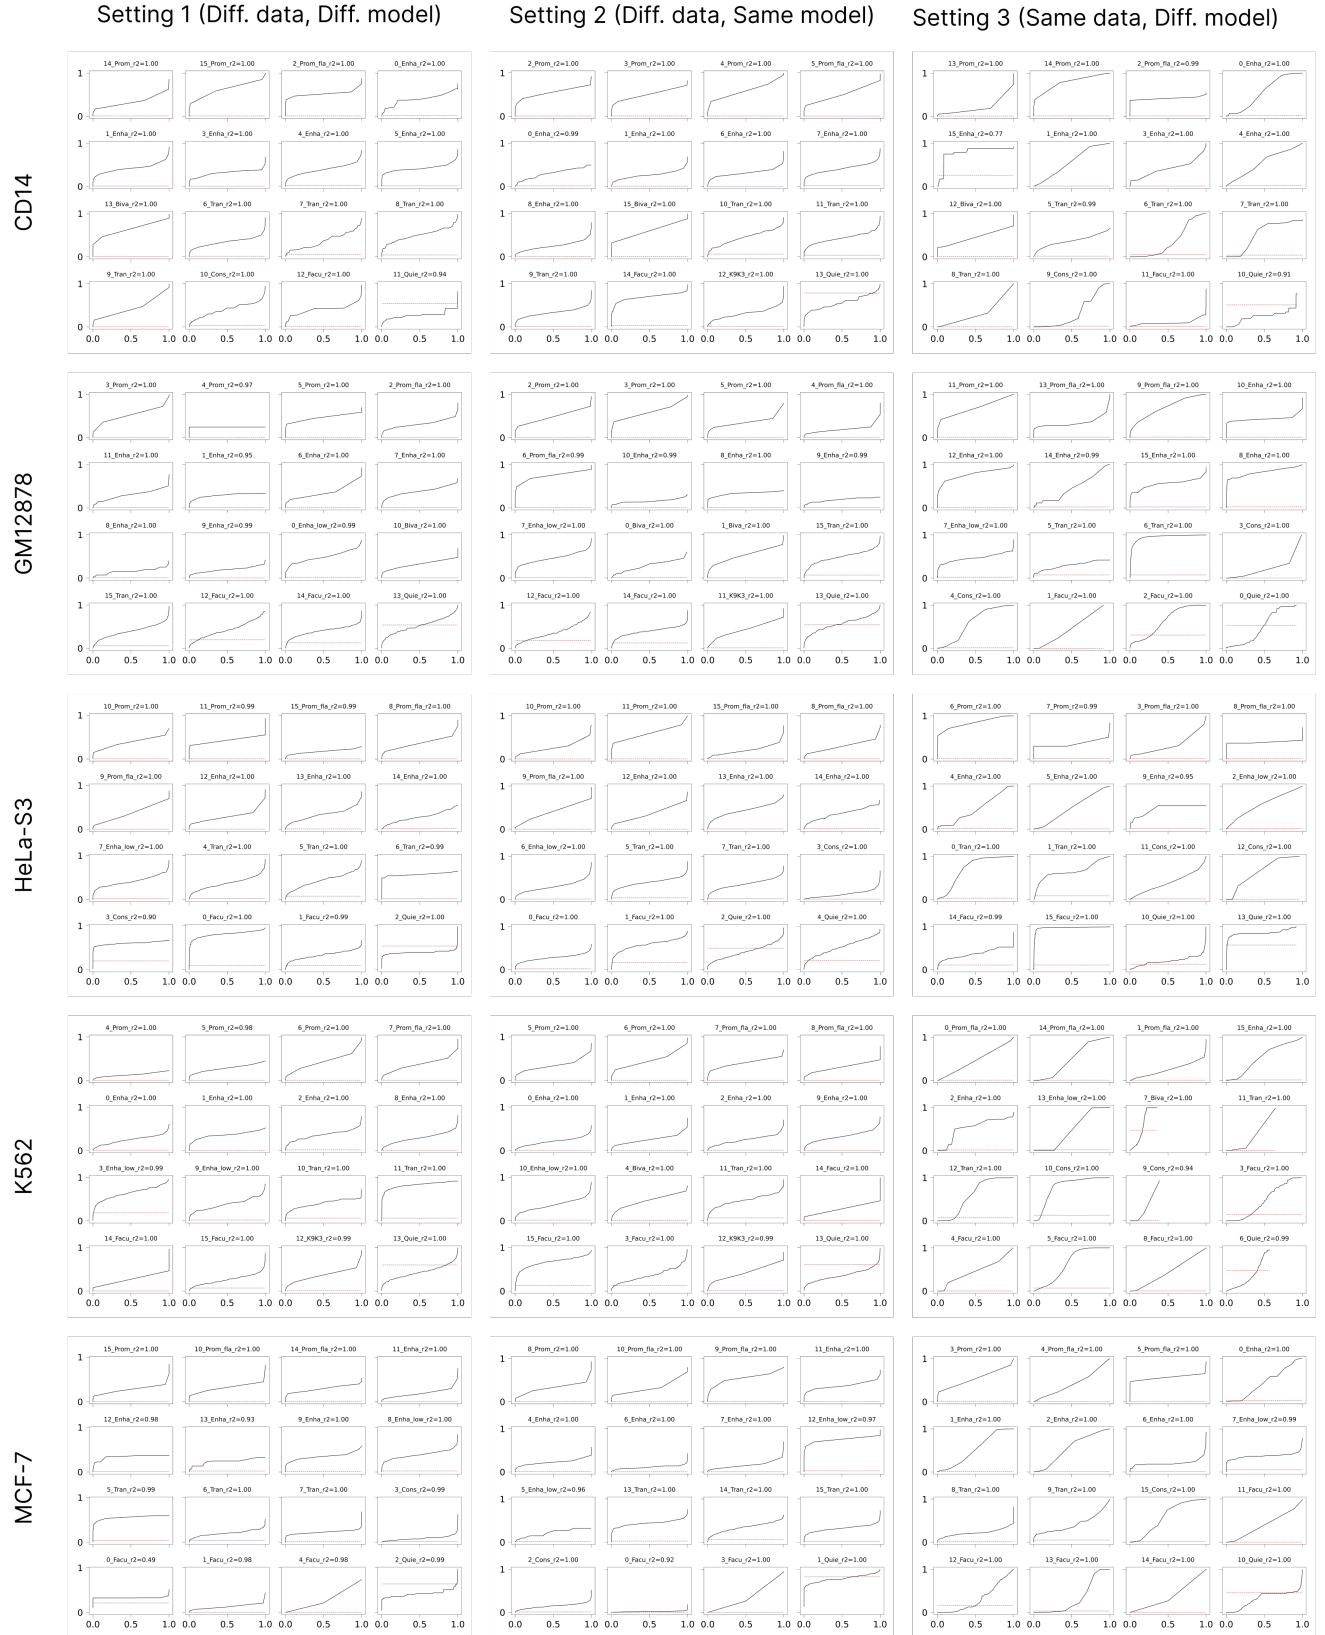

Figure 21: For each chromatin state in the base annotation, we measure the frequency of overlap with a corresponding state as a function of their posterior probability. We observe a clear association between the overlap and the posterior probability. Rows correspond to different cell types and columns correspond to settings of variability.

## 5.1.2 Segway

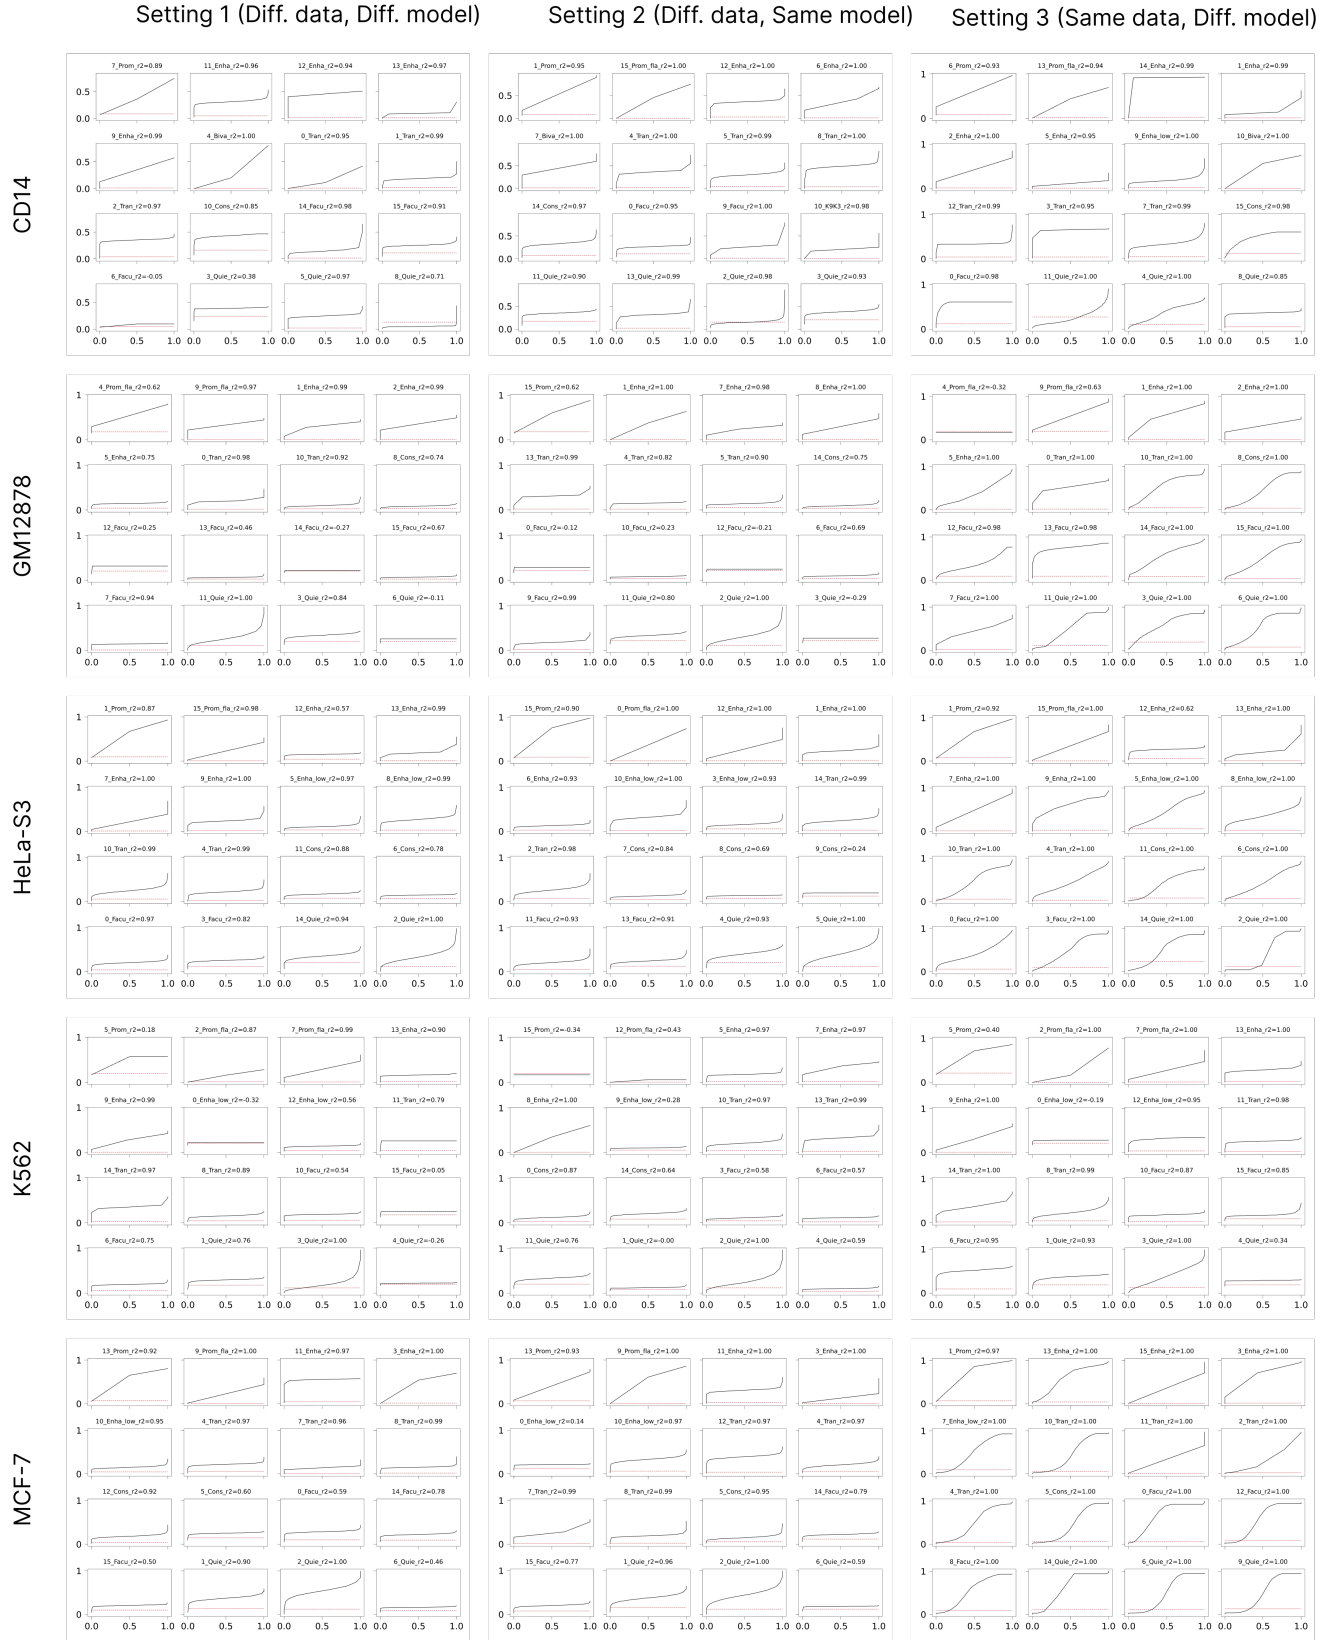

Figure 22: For each chromatin state in the base annotation, we measure the frequency of overlap with a corresponding state as a function of their posterior probability. We observe a clear association between the overlap and the posterior probability. Rows correspond to different cell types and columns correspond to settings of variability.

## 5.2 Transcription (gene body) as a function of posterior probability

### 5.2.1 ChromHMM

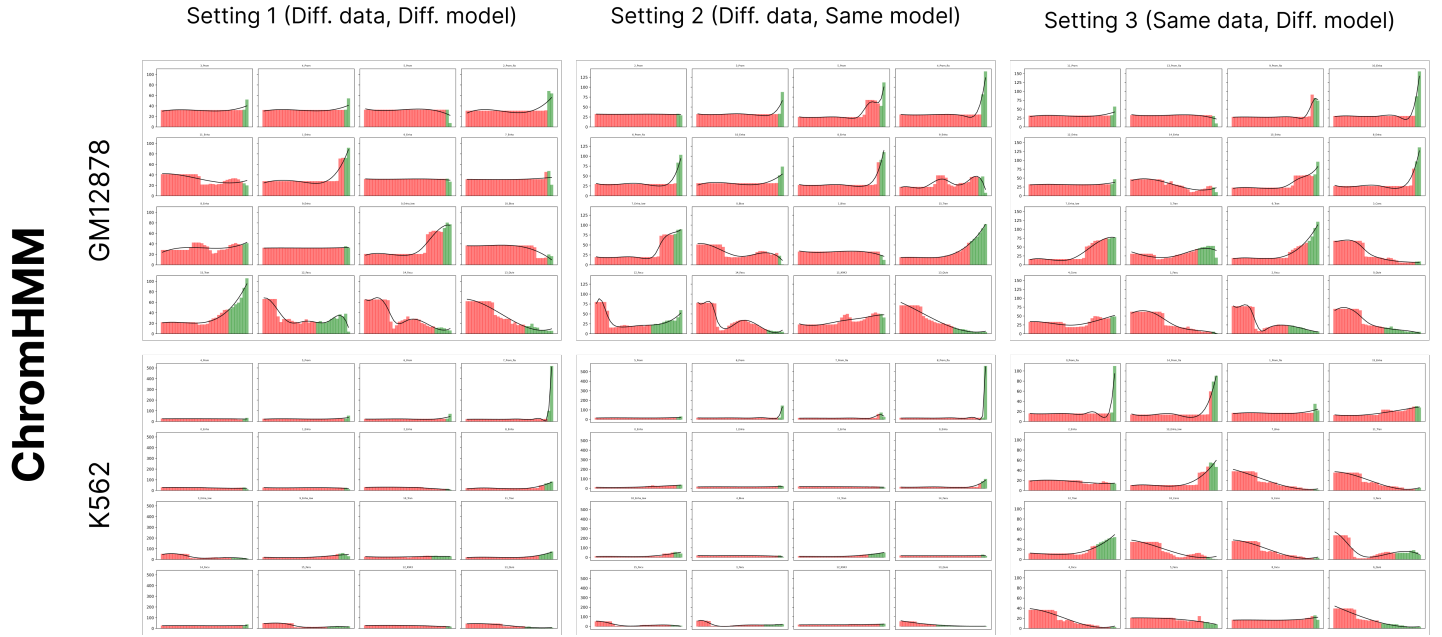

Figure 23: Mean expression level (TPM) in the gene-body as a function of posterior probability for ChromHMM runs in cell types GM12878 and K562. The horizontal axis represents rank of posterior probability, while the vertical axis shows TPM.

### 5.2.2 Segway

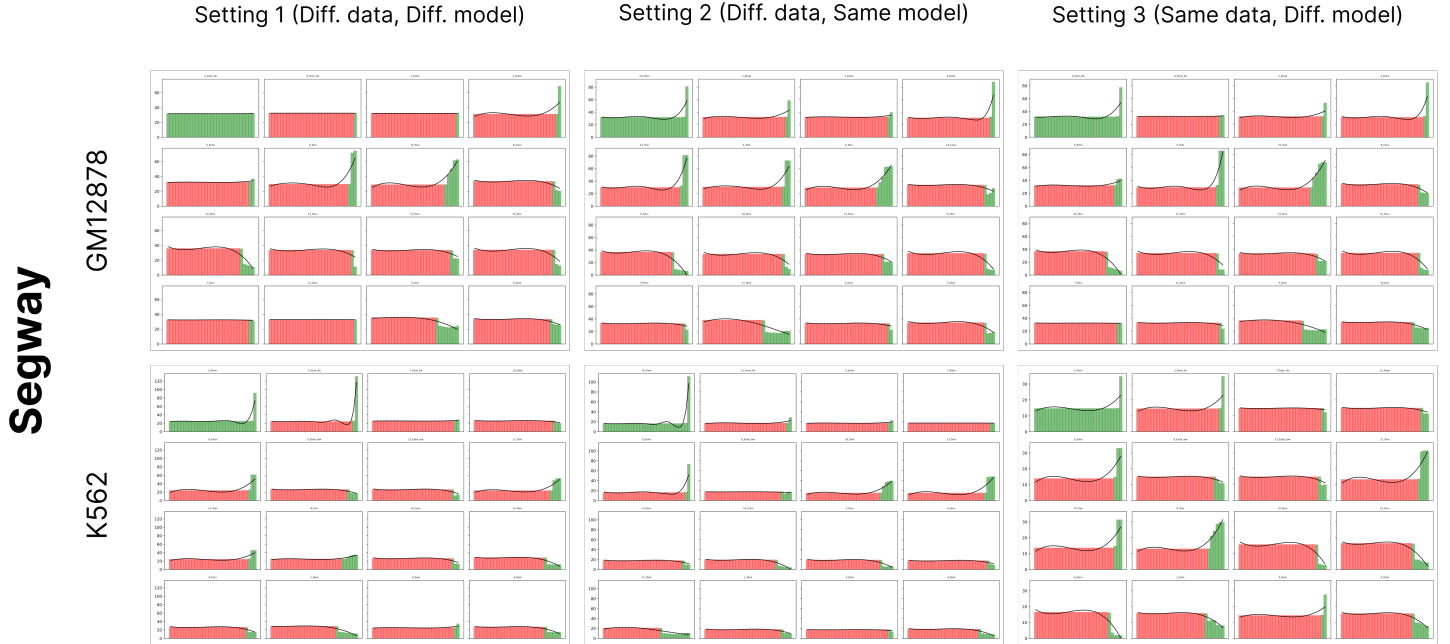

Figure 24: Mean expression level (TPM) in the gene-body as a function of posterior probability for Segway runs in cell types GM12878 and K562. The horizontal axis represents rank of posterior probability, while the vertical axis shows TPM.

## 5.3 Transcription (around TSS) as a function of posterior probability

### 5.3.1 ChromHMM

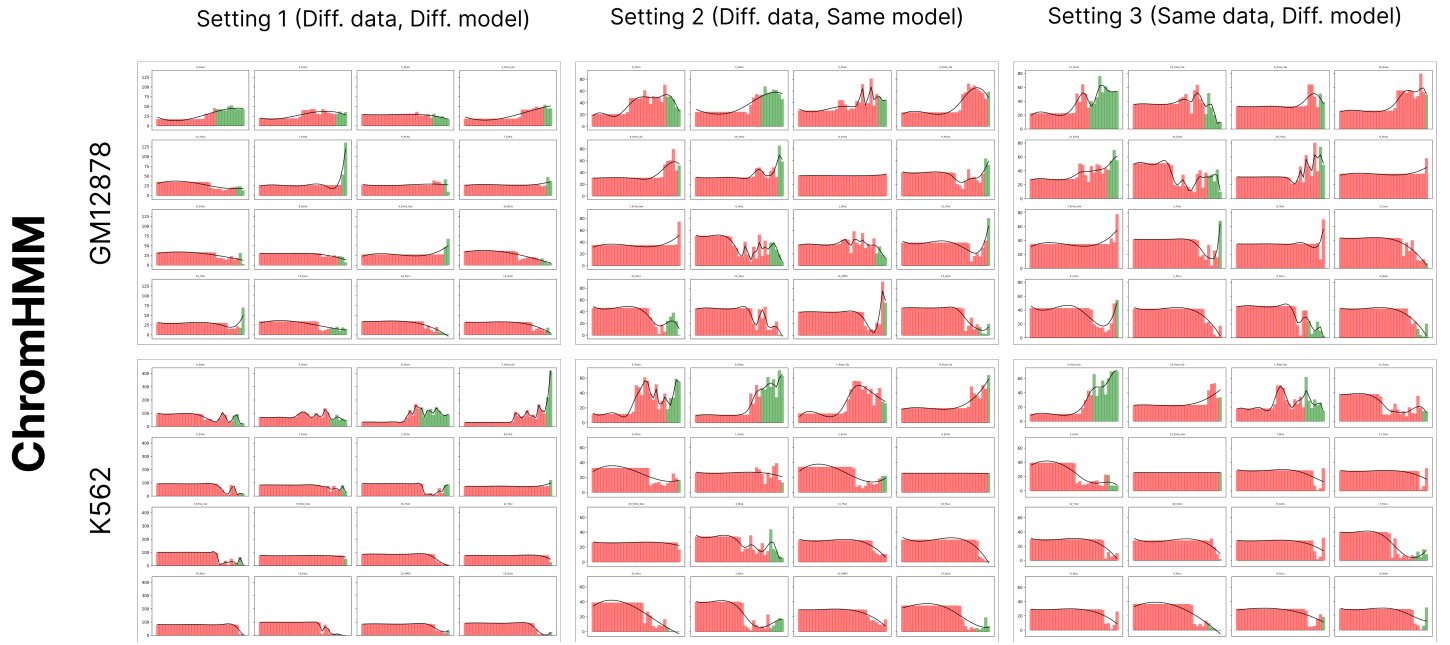

Figure 25: Mean expression level (TPM) around Transcription start sites as a function of posterior probability for ChromHMM runs in cell types GM12878 and K562. The horizontal axis represents rank of posterior probability, while the vertical axis shows TPM.

### 5.3.2 Segway

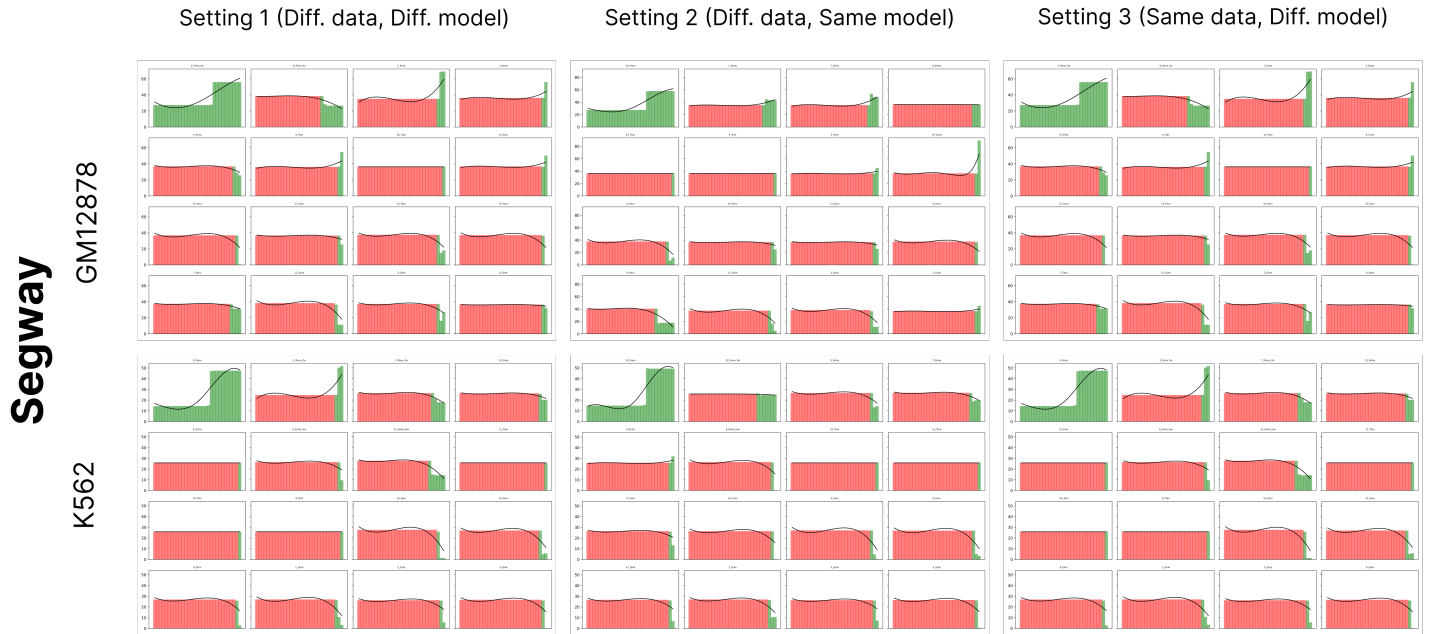

Figure 26: Mean expression level (TPM) around Transcription start sites as a function of posterior probability for Segway runs in cell types GM12878 and K562. The horizontal axis represents rank of posterior probability, while the vertical axis shows TPM.



## 5.4 TSS enrichment as a function of posterior probability

### 5.4.1 ChromHMM

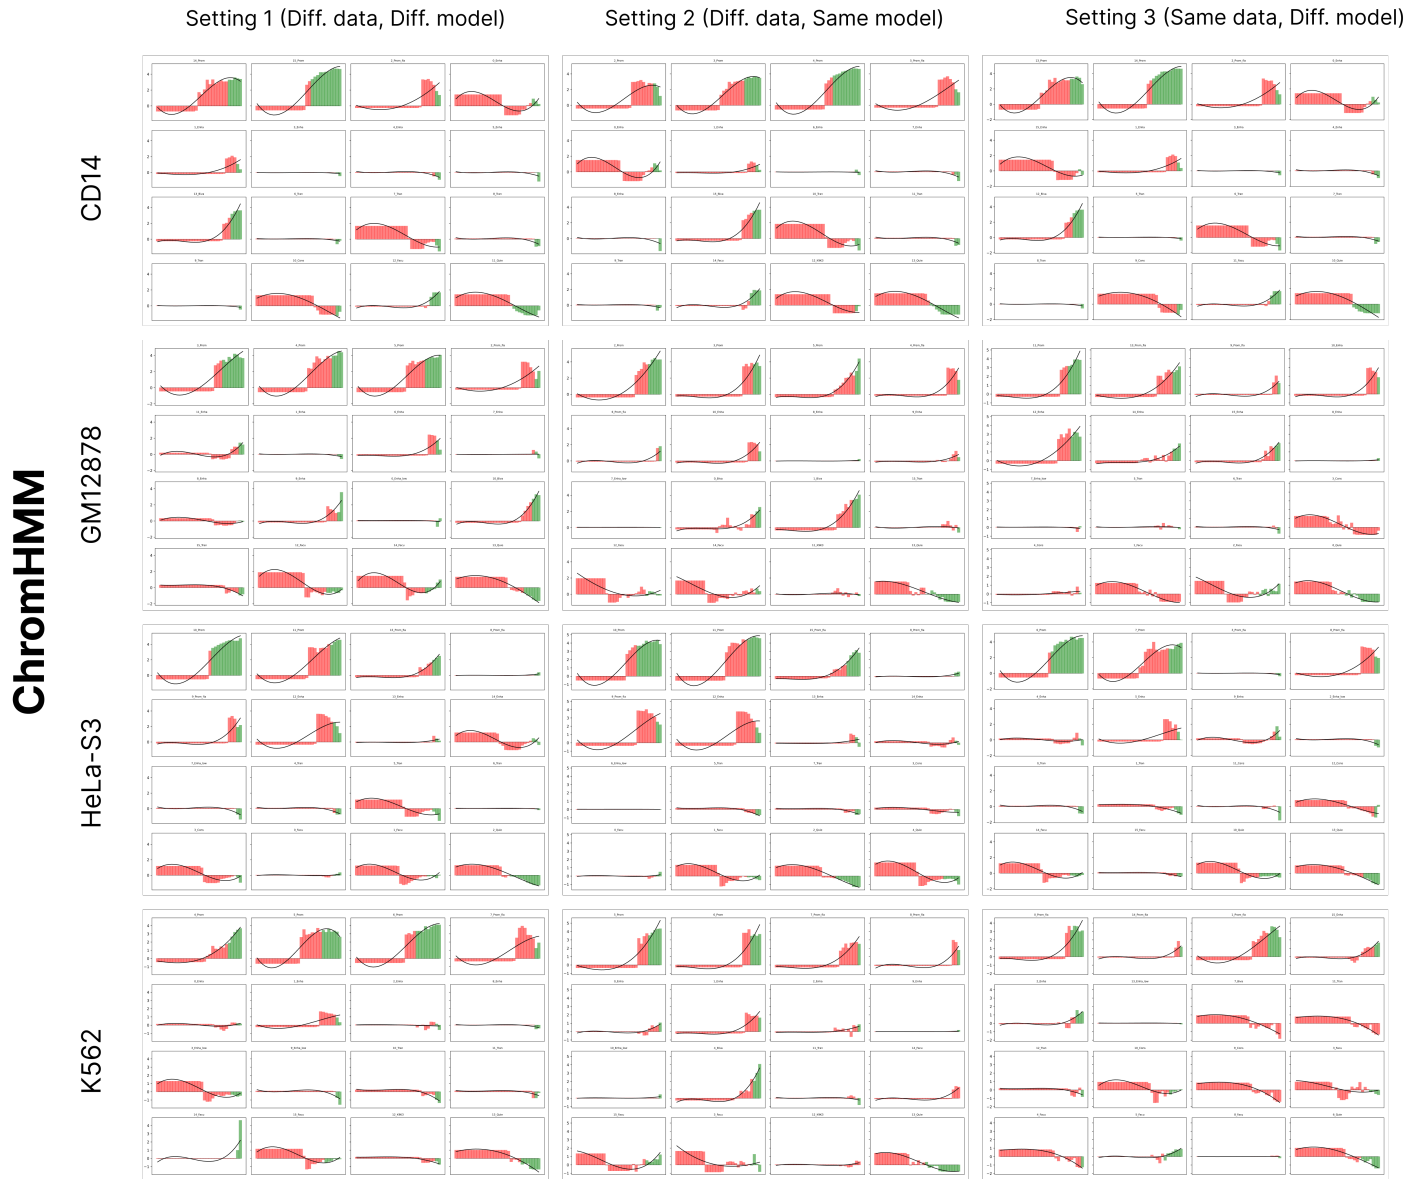

Figure 27: Enrichment of states around Transcription start sites as a function of posterior probability for ChromHMM runs in cell types GM12878 and K562. The horizontal axis represents rank of posterior probability, while the vertical axis shows TPM.

### 5.4.2 Segway

## Segway

CD14

GM12878

HeLa-S3

K562

Setting 1 (Diff. data, Diff. model)

Setting 2 (Diff. data, Same model)

Setting 3 (Same data, Diff. model)

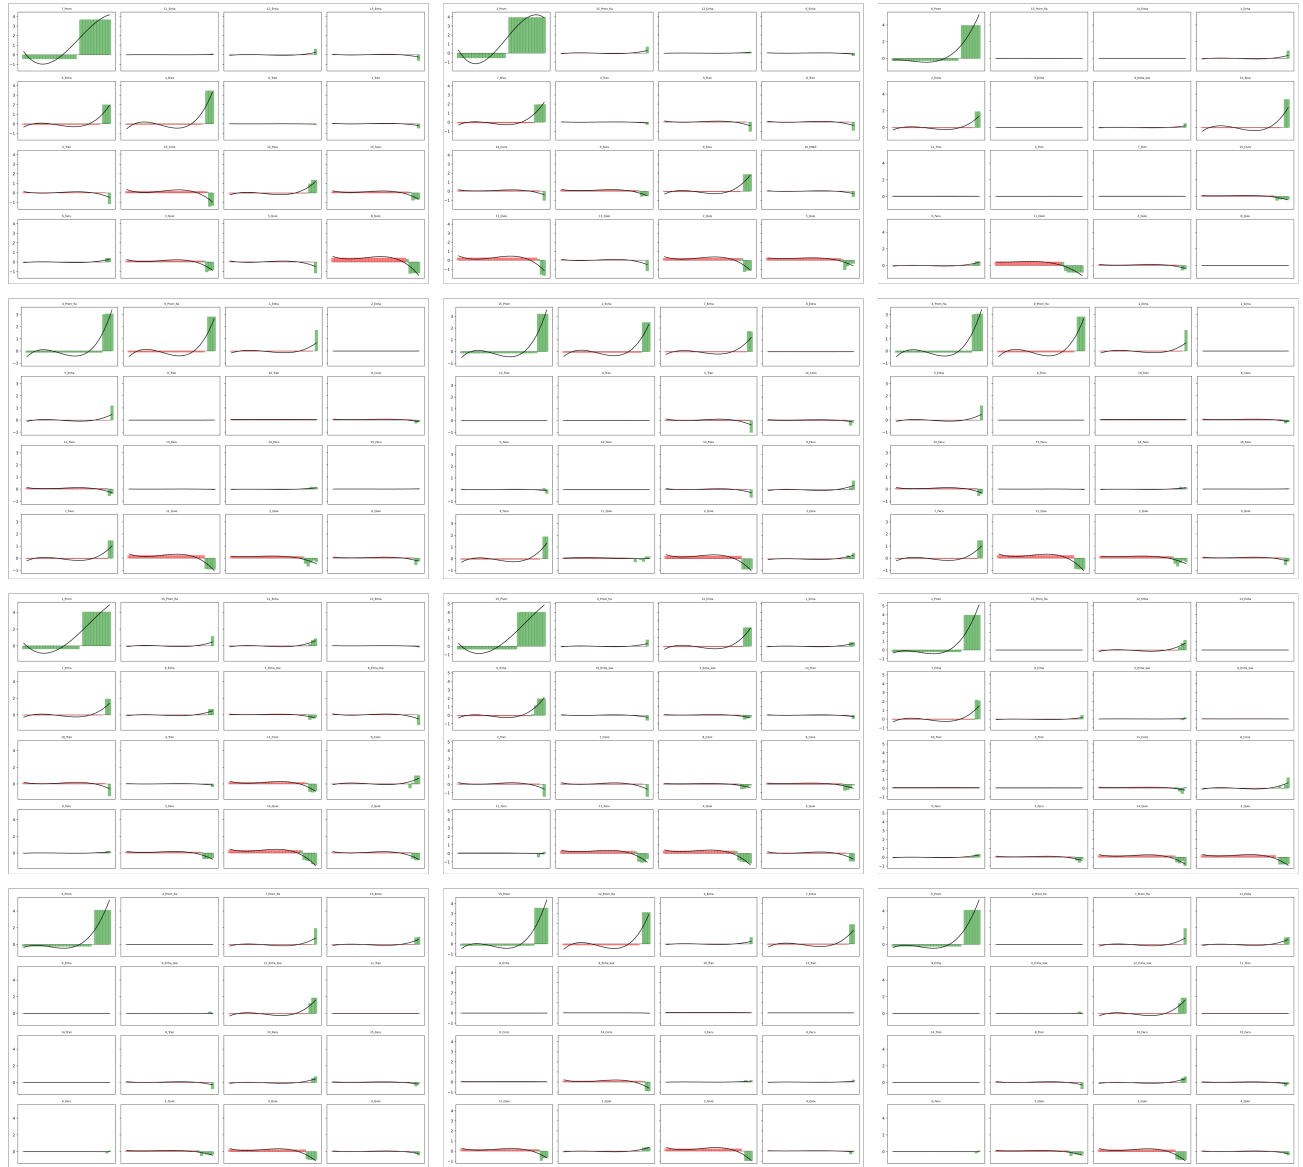

Figure 28: Enrichment of states around Transcription start sites as a function of posterior probability for Segway runs in cell types GM12878 and K562. The horizontal axis represents rank of posterior probability, while the vertical axis shows TPM.

## 6 Reproducibility analysis yields robust annotations

### 6.1 r-value

# ChromHMM

CD14

Setting 1 (Diff. data, Diff. model)

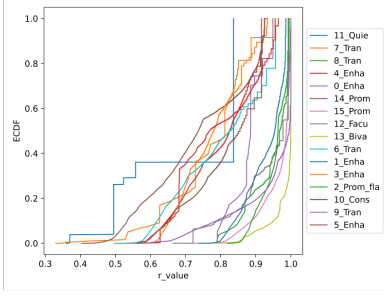

Setting 2 (Diff. data, Same model)

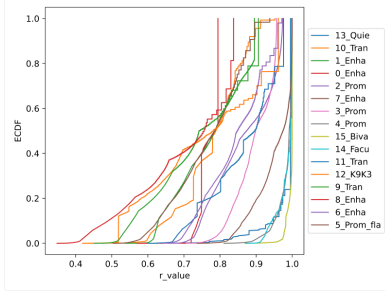

Setting 3 (Same data, Diff. model)

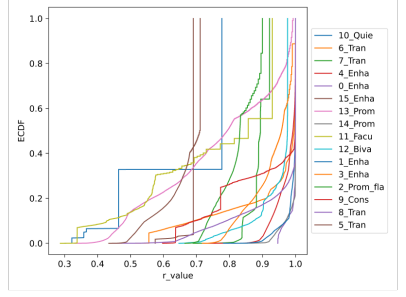

GM12878

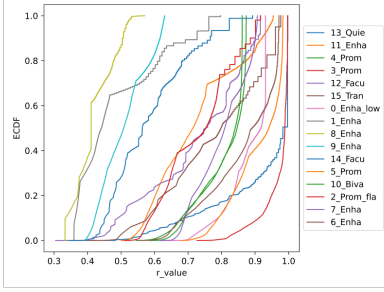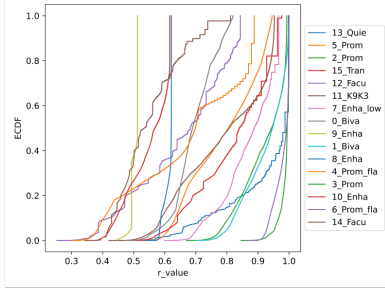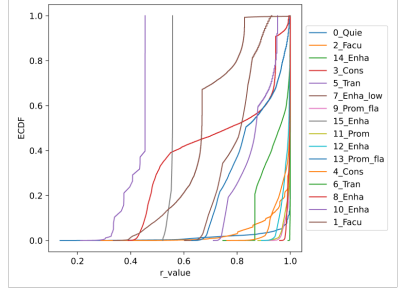

HeLa-S3

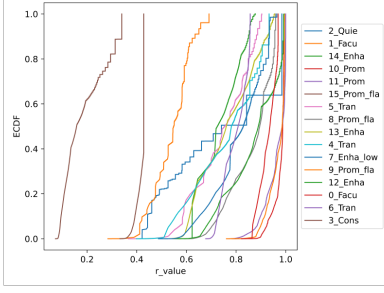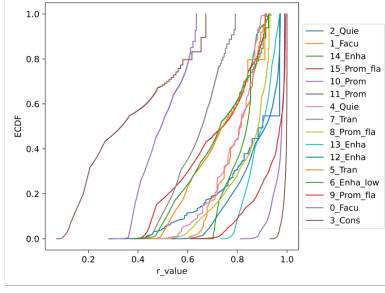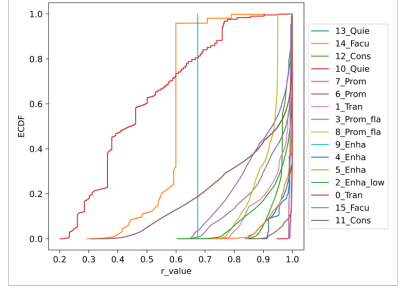

K562

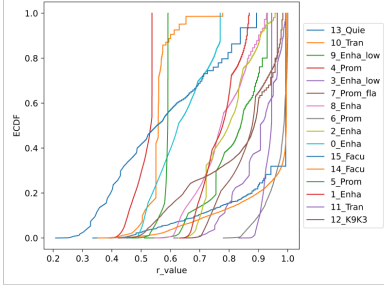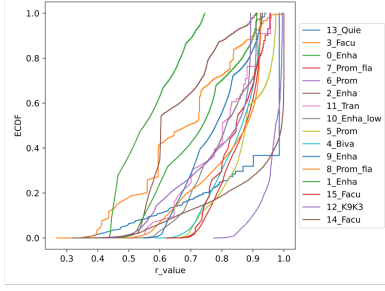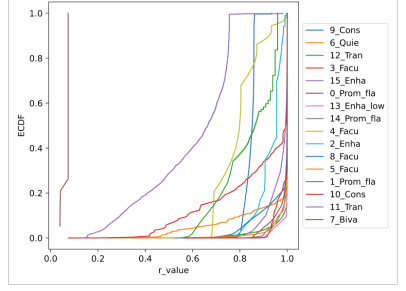

MCF-7

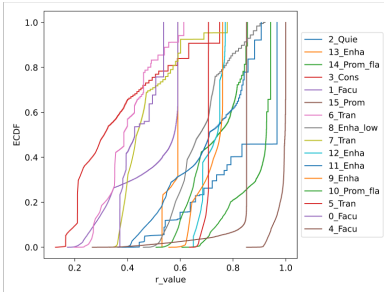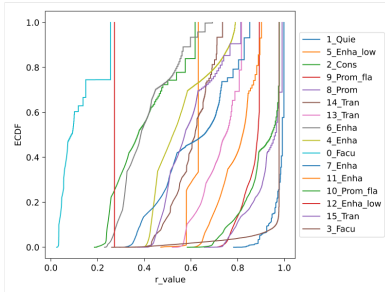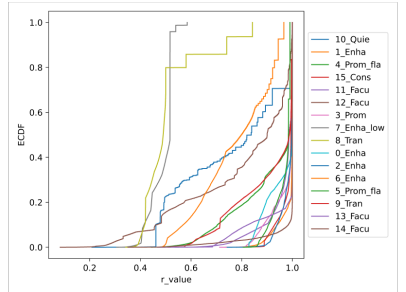

Figure 29: Empirical cumulative distribution function (ECDF) of r-value for all states in ChromHMM runs across five cell types (rows) and three settings of variability (columns).

# Segway

CD14

Setting 1 (Diff. data, Diff. model)

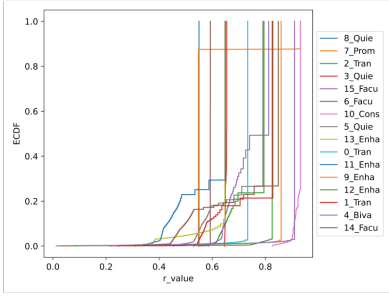

Setting 2 (Diff. data, Same model)

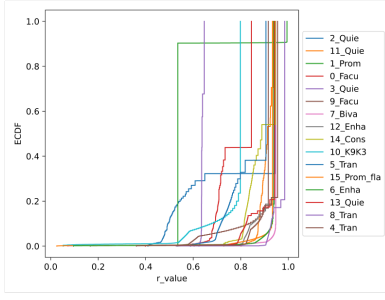

Setting 3 (Same data, Diff. model)

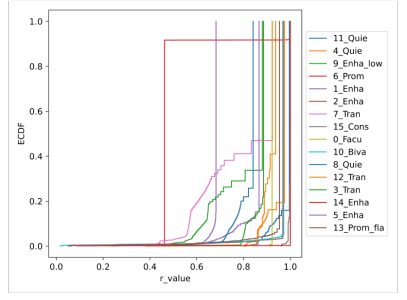

GM12878

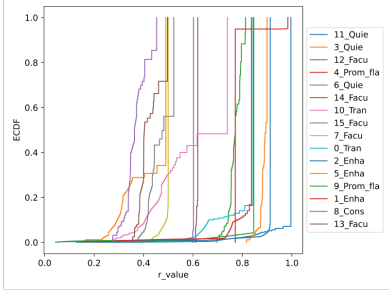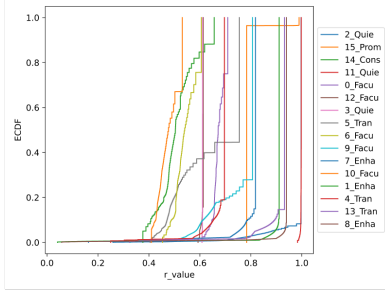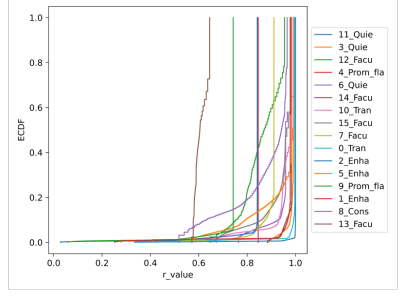

HeLa-S3

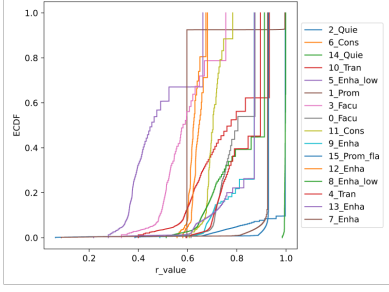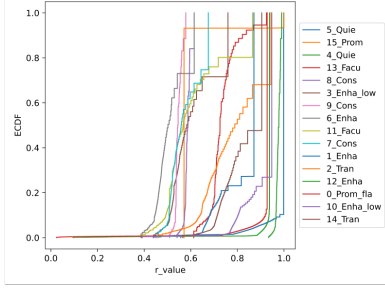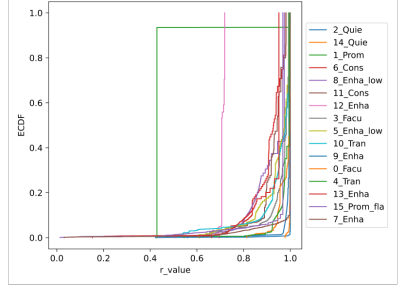

K562

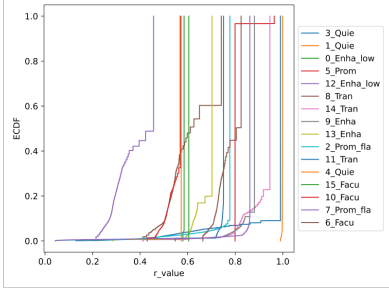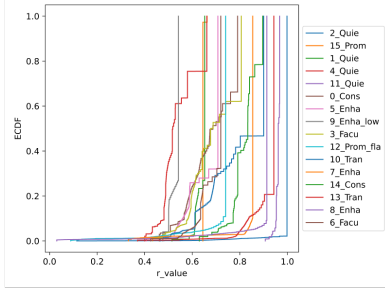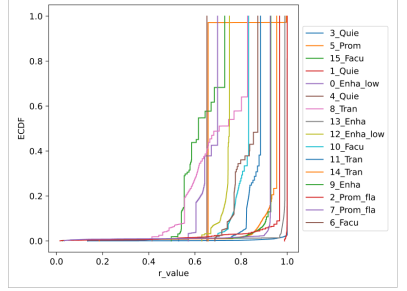

MCF-7

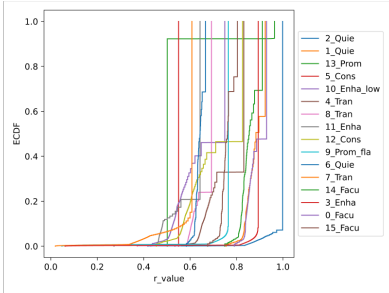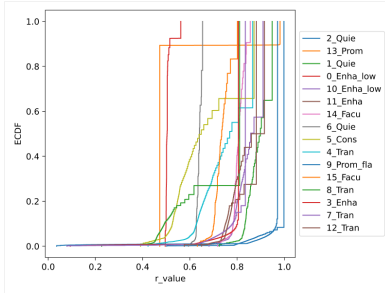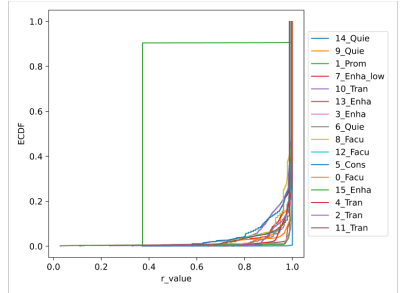

Figure 30: Empirical cumulative distribution function (ECDF) of r-value for all states in Segway runs across five cell types (rows) and three settings of variability (columns).

6.2 Fraction of confident genomic regions

ChromHMM

Segway

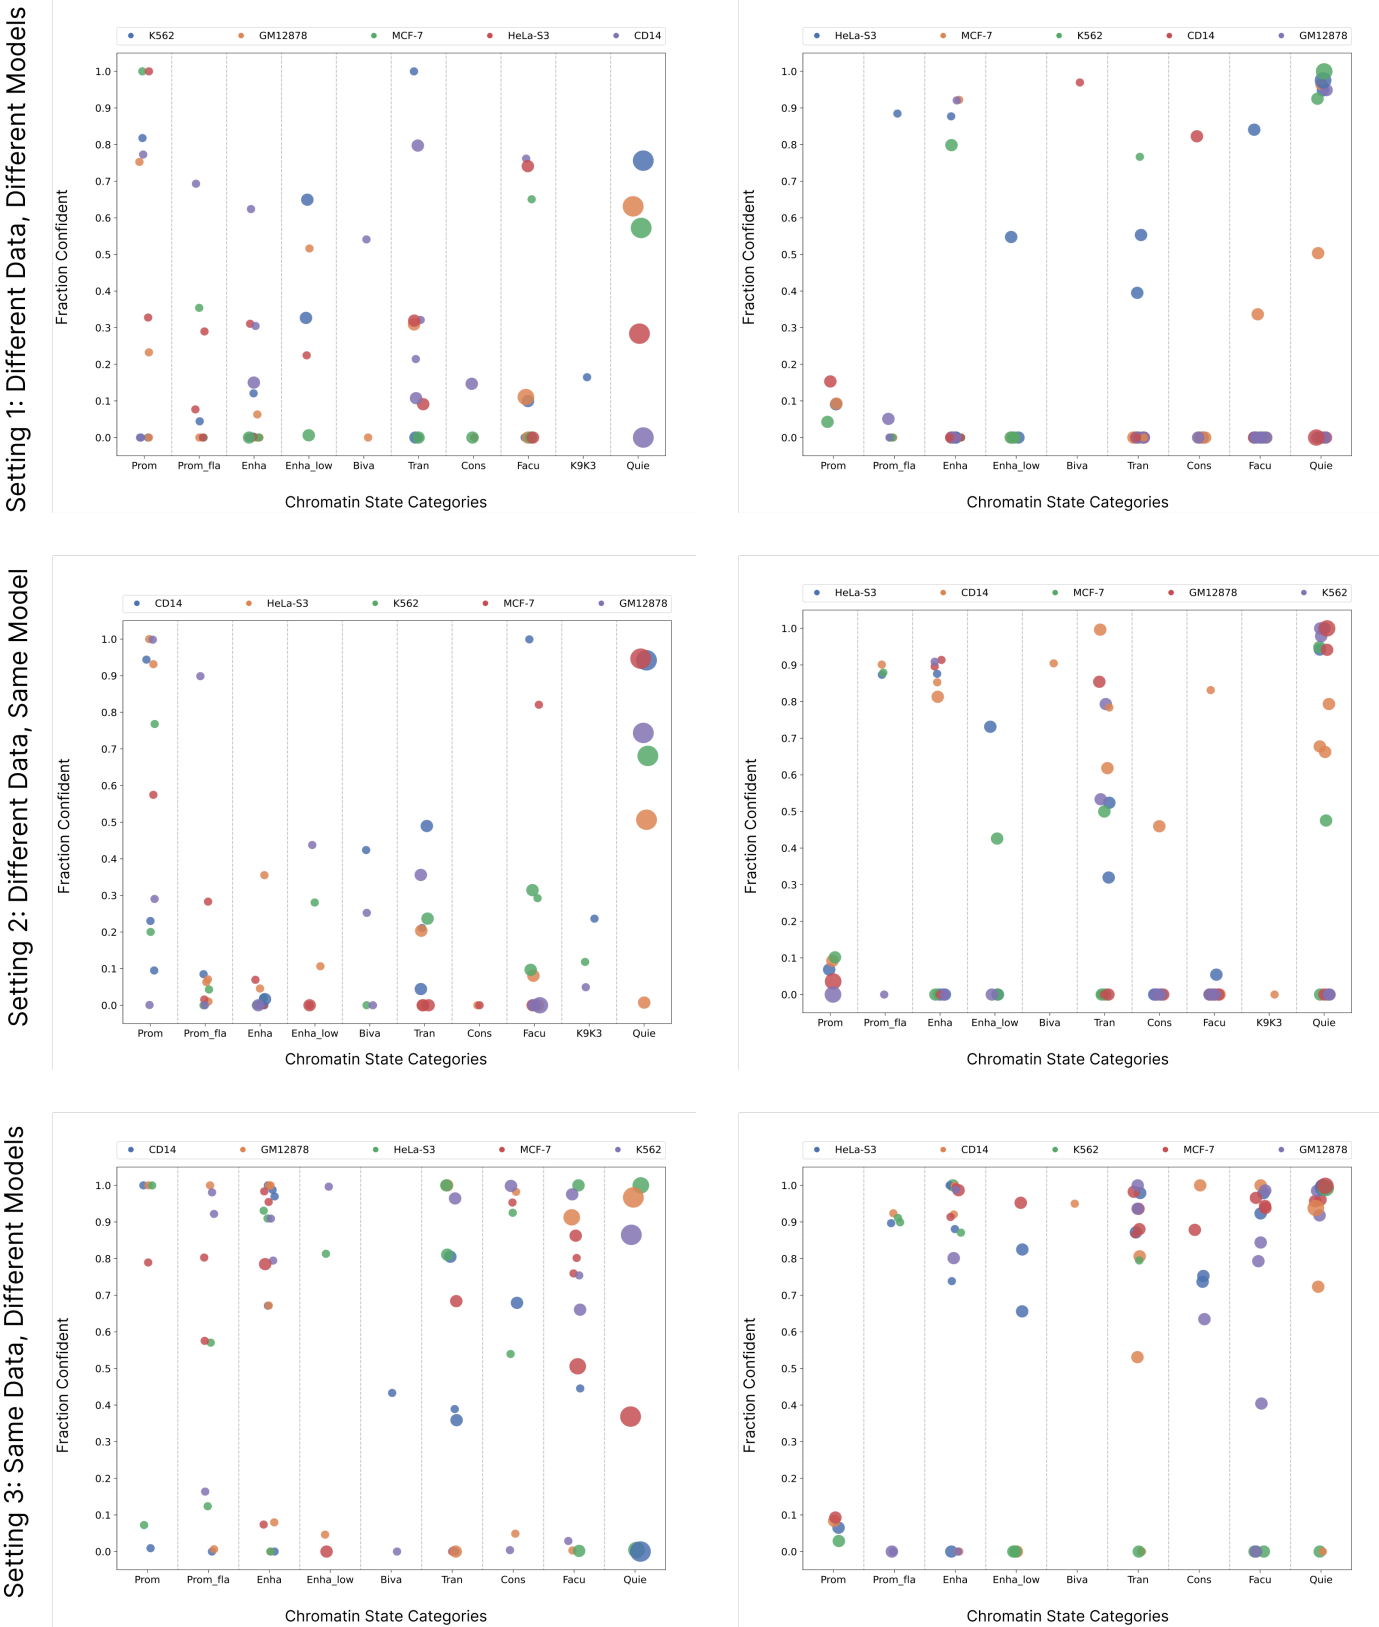

Figure 31: Fraction of confident genomic regions of various chromatin states categories identified in the ChromHMM (left column) and Segway (right column) annotation according to three settings of variability (rows) for five cell types. Each dot represents a chromatin state, with color denoting cell type and size proportional to genome coverage.

## 6.3 Expression as a function of $r$ -value

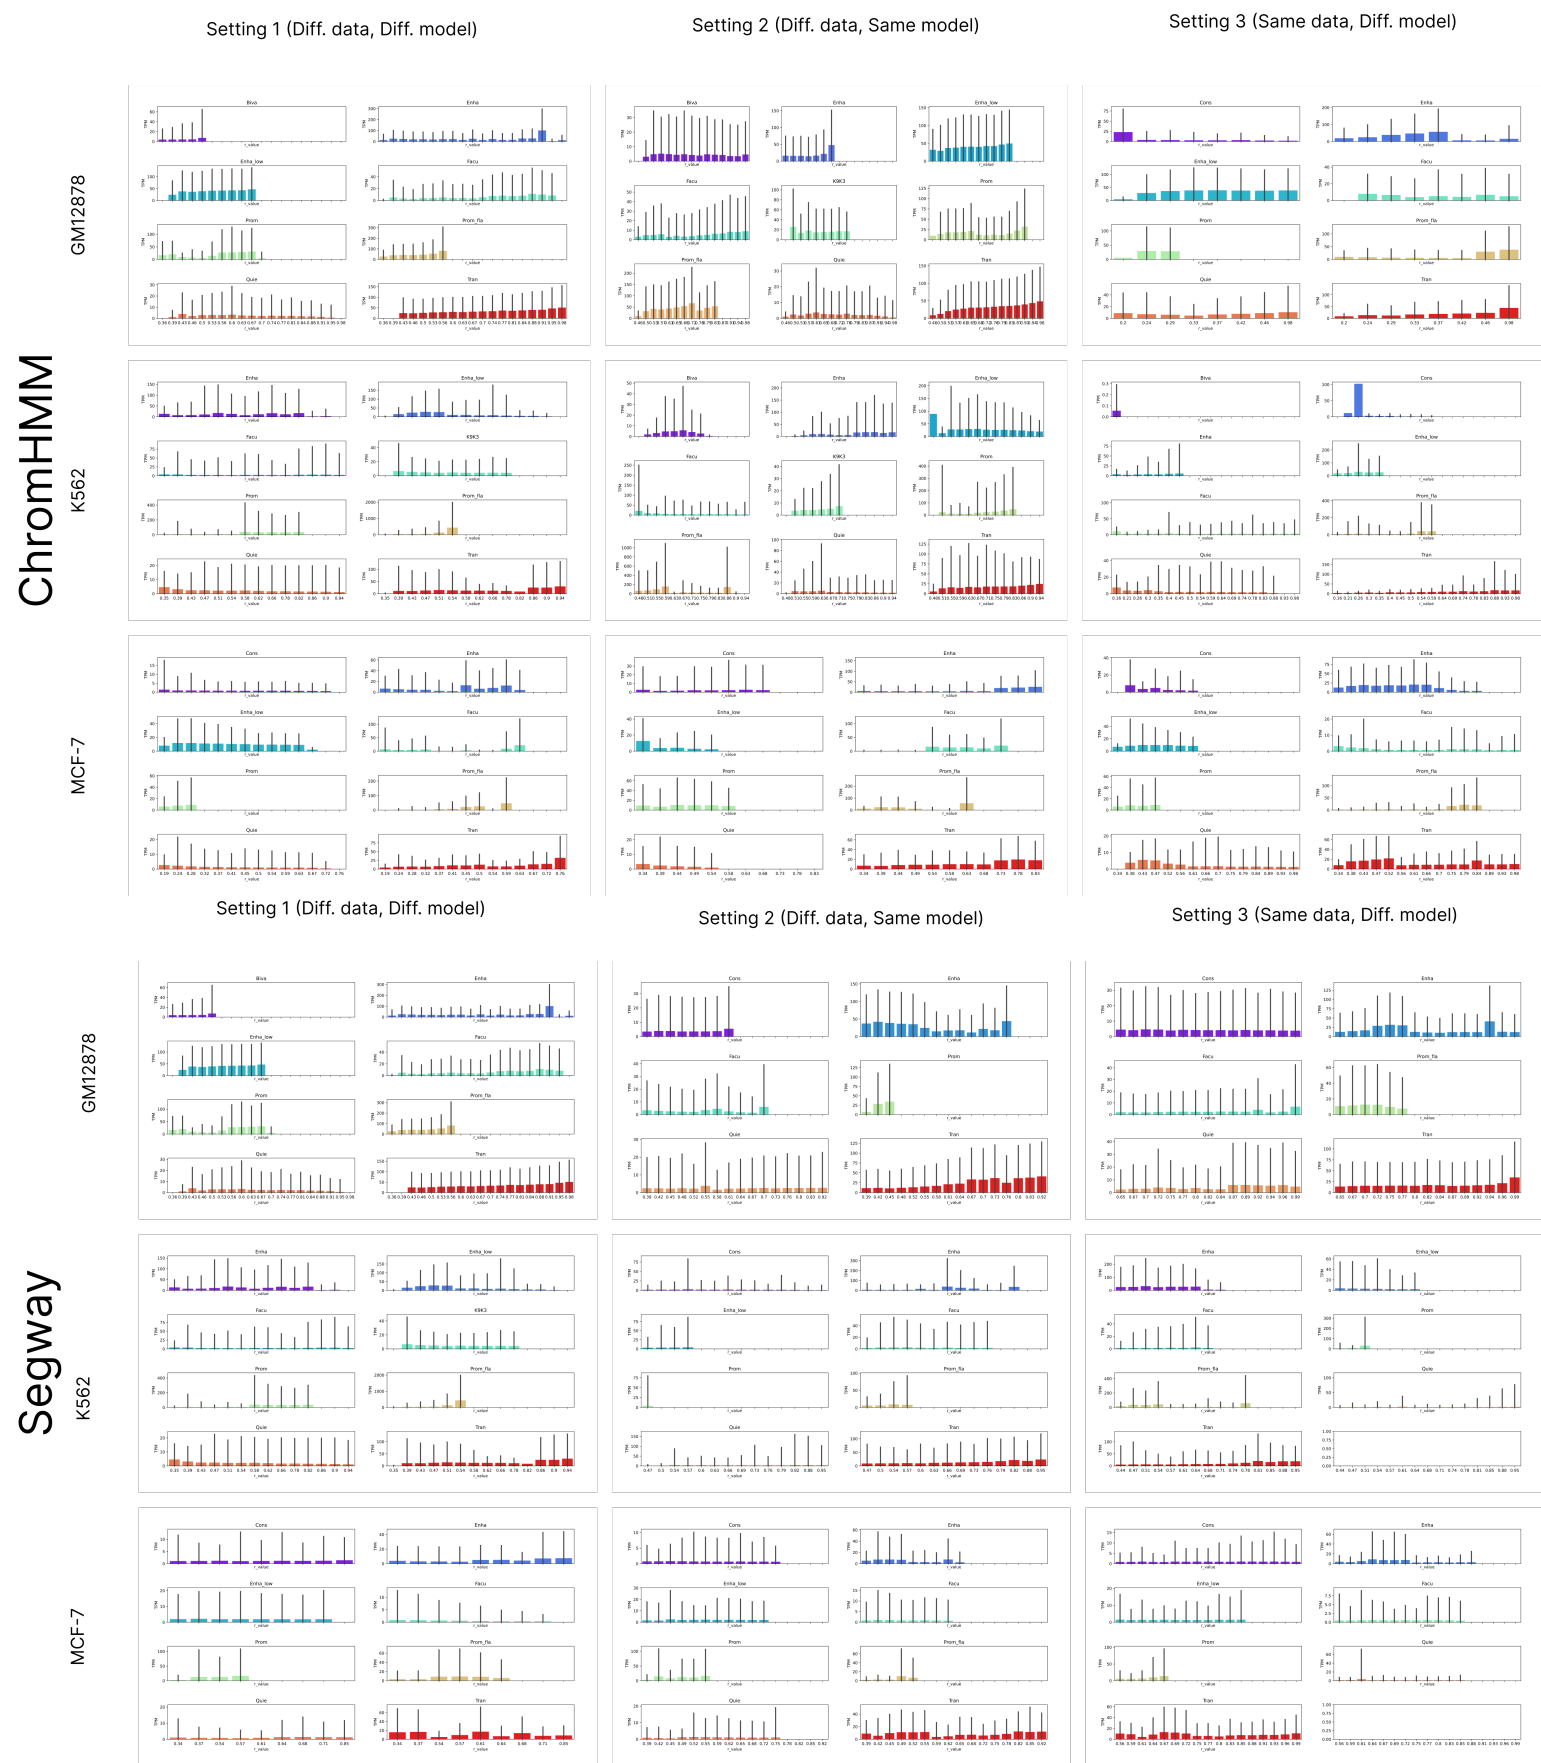

## 6.4 Correlation of expression and $r$ -value

ChromHMM

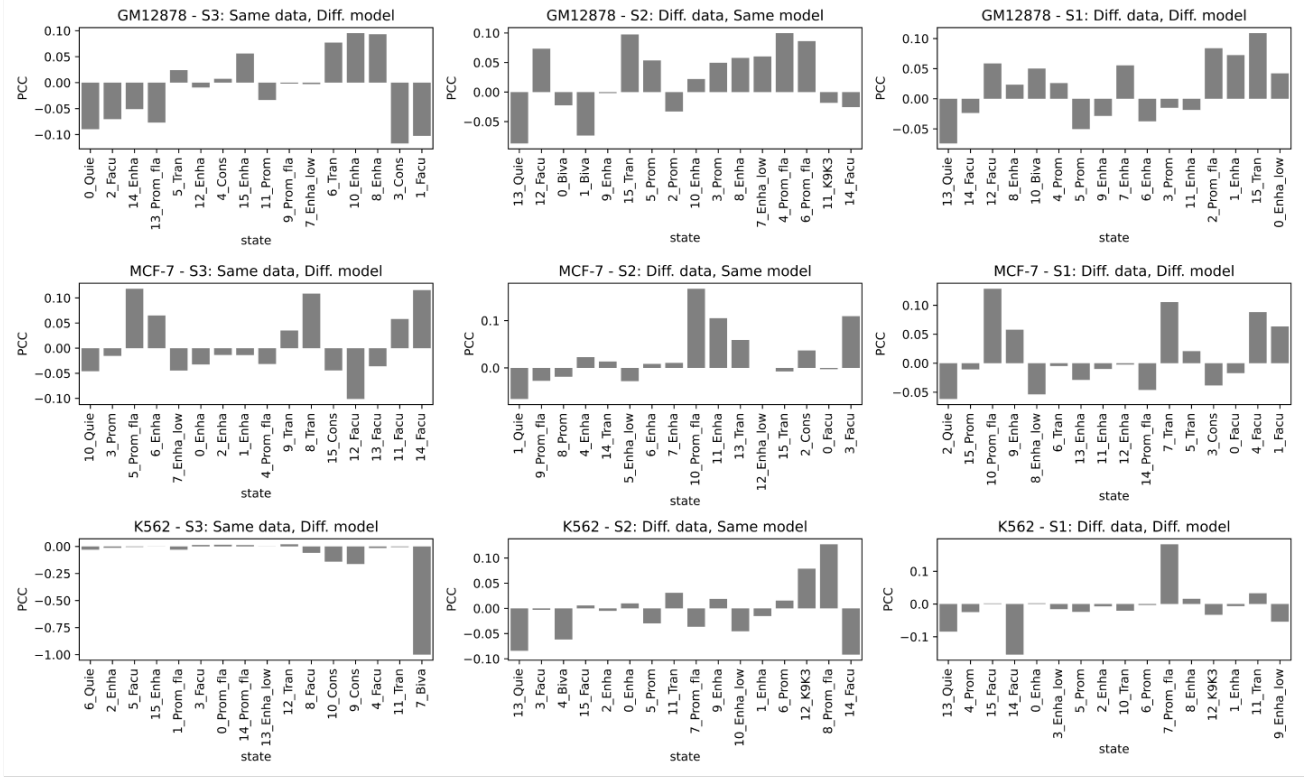

Segway

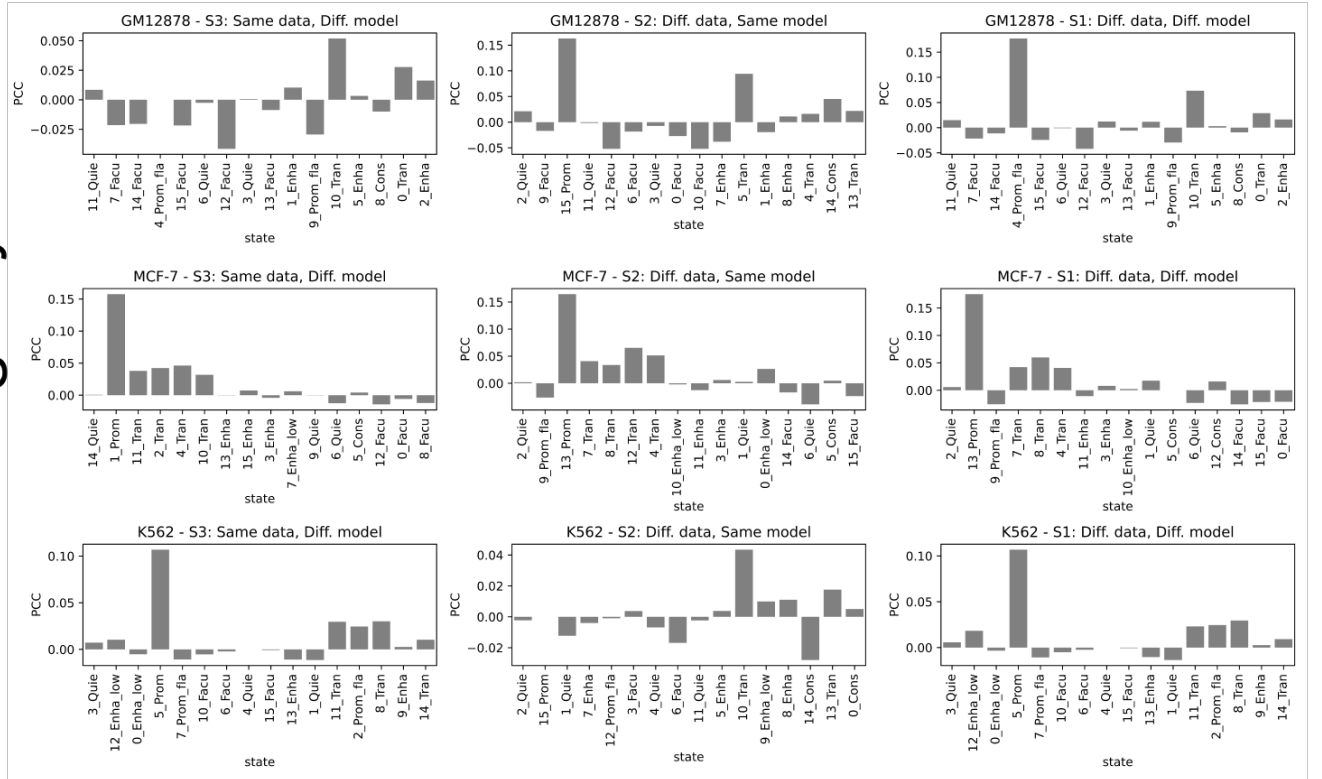

Figure 33: Figure illustrating Pearson correlation coefficient (PCC) of  $r$ -value and expression level (TPM) for different chromatin states.

## 6.5 Expression comparison of confident and non-confident transcribed states

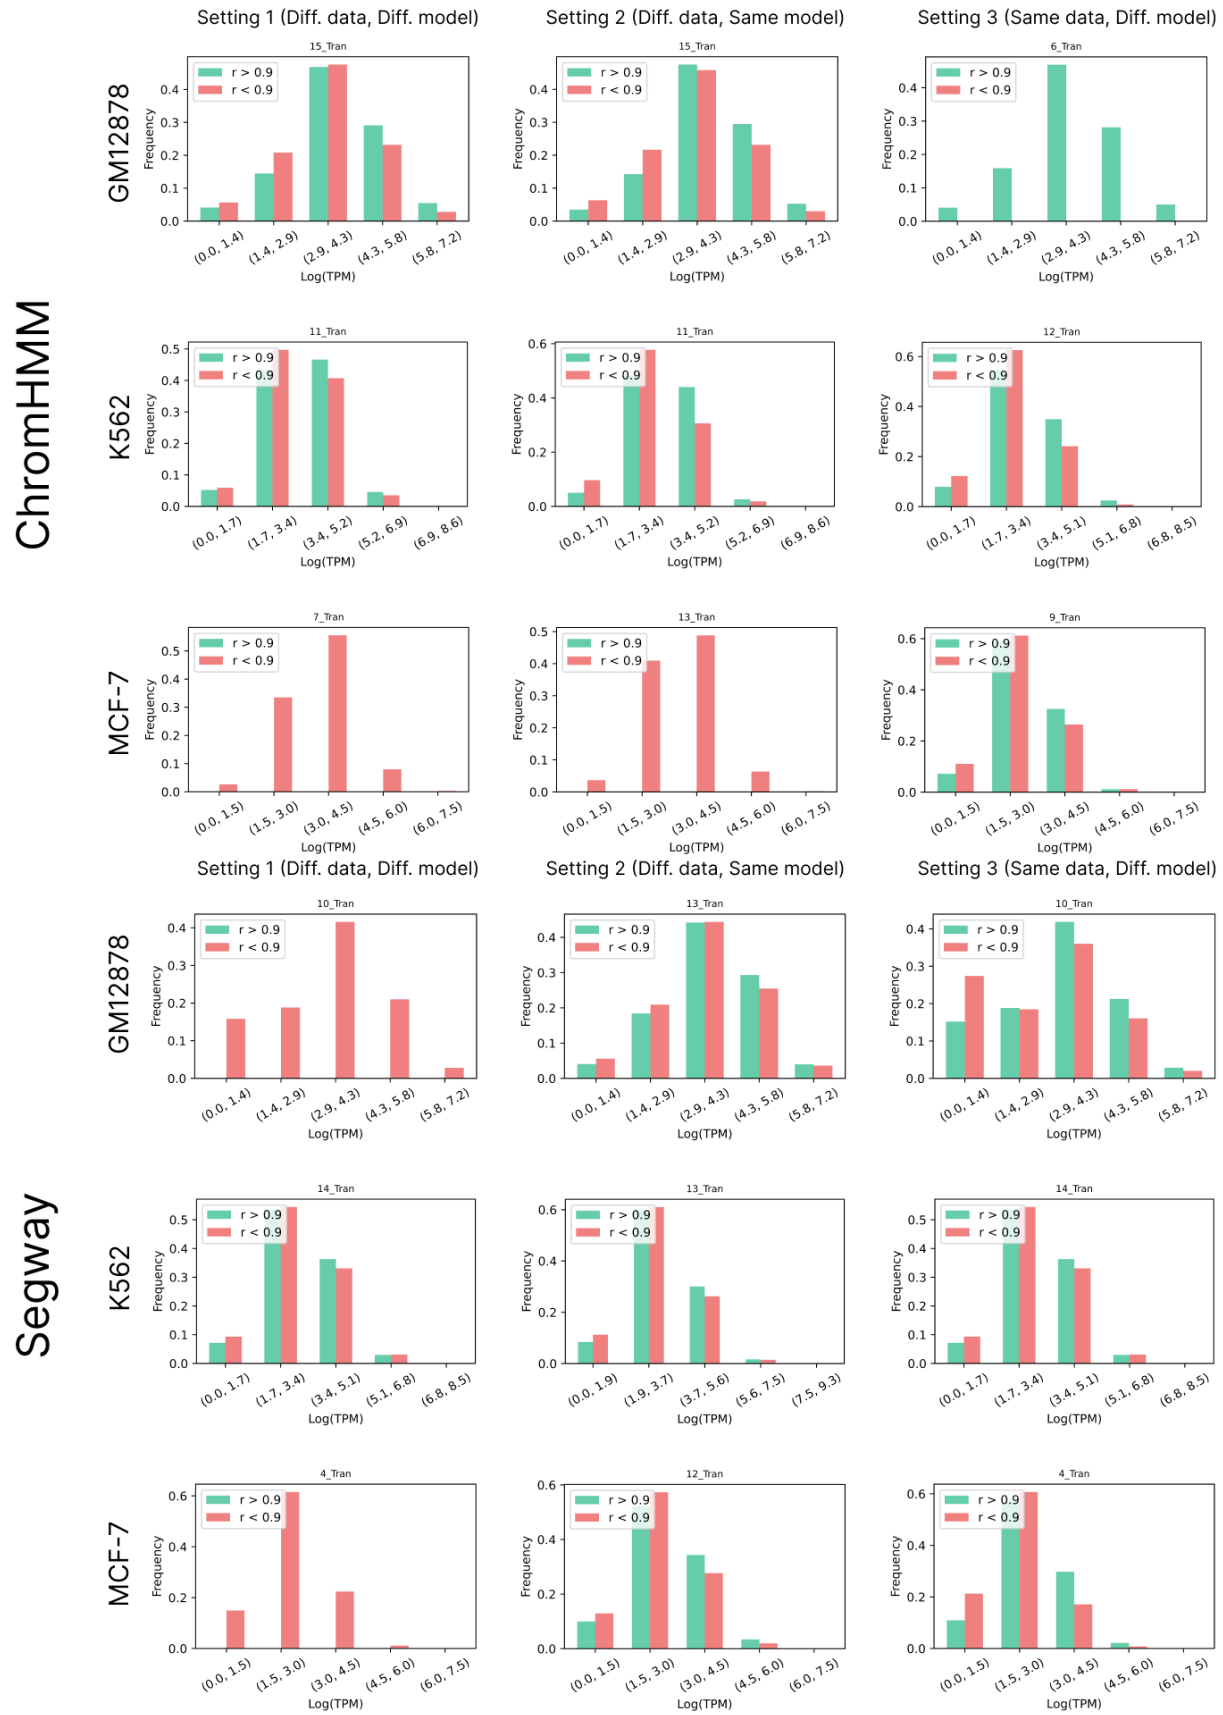

Figure 34: Histogram comparing the frequencies of log(TPM) values for confident ( $r \geq 0.9$ ) and non-confident ( $r < 0.9$ ) annotations of transcribed chromatin states. The x-axis represents ranges of log(TPM) with each pair of bars corresponding to confident (green) and non-confident (red) annotations respectively.



## 6.6 Reproducibility over segments

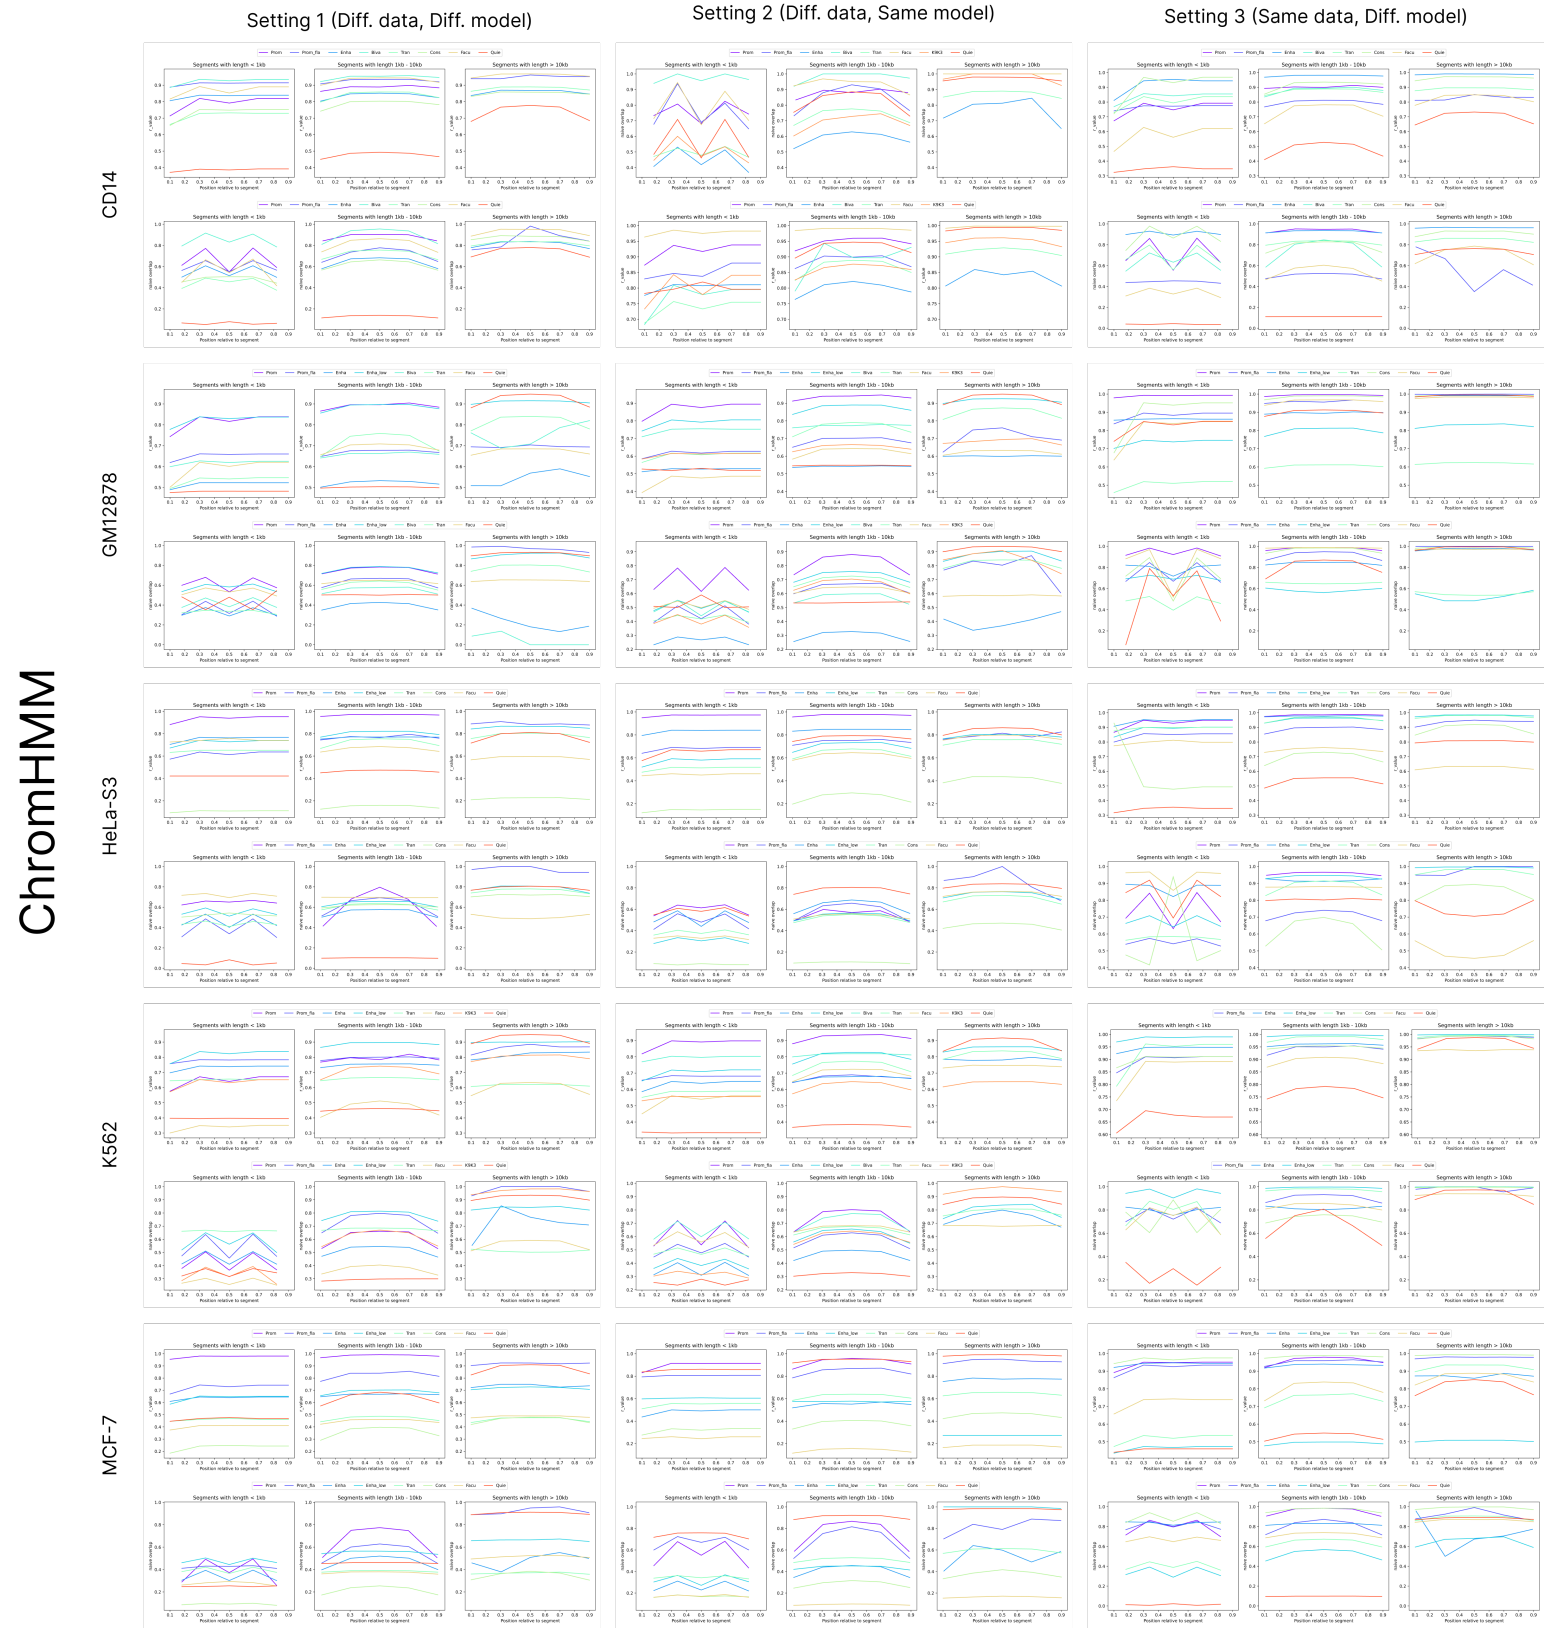

Figure 35: Figure illustrating reproducibility of ChromHMM annotations across segment lengths. For each pair of cell type and setting, top and bottom sub-figures show r-value and naive overlap distribution, respectively. Sub-figures from left to right represent segments < 1 kb, 1 – 10kb, and ≥ 10kb. Colors denote different chromatin state categories.

Setting 1 (Diff. data, Diff. model)

Setting 2 (Diff. data, Same model)

Setting 3 (Same data, Diff. model)

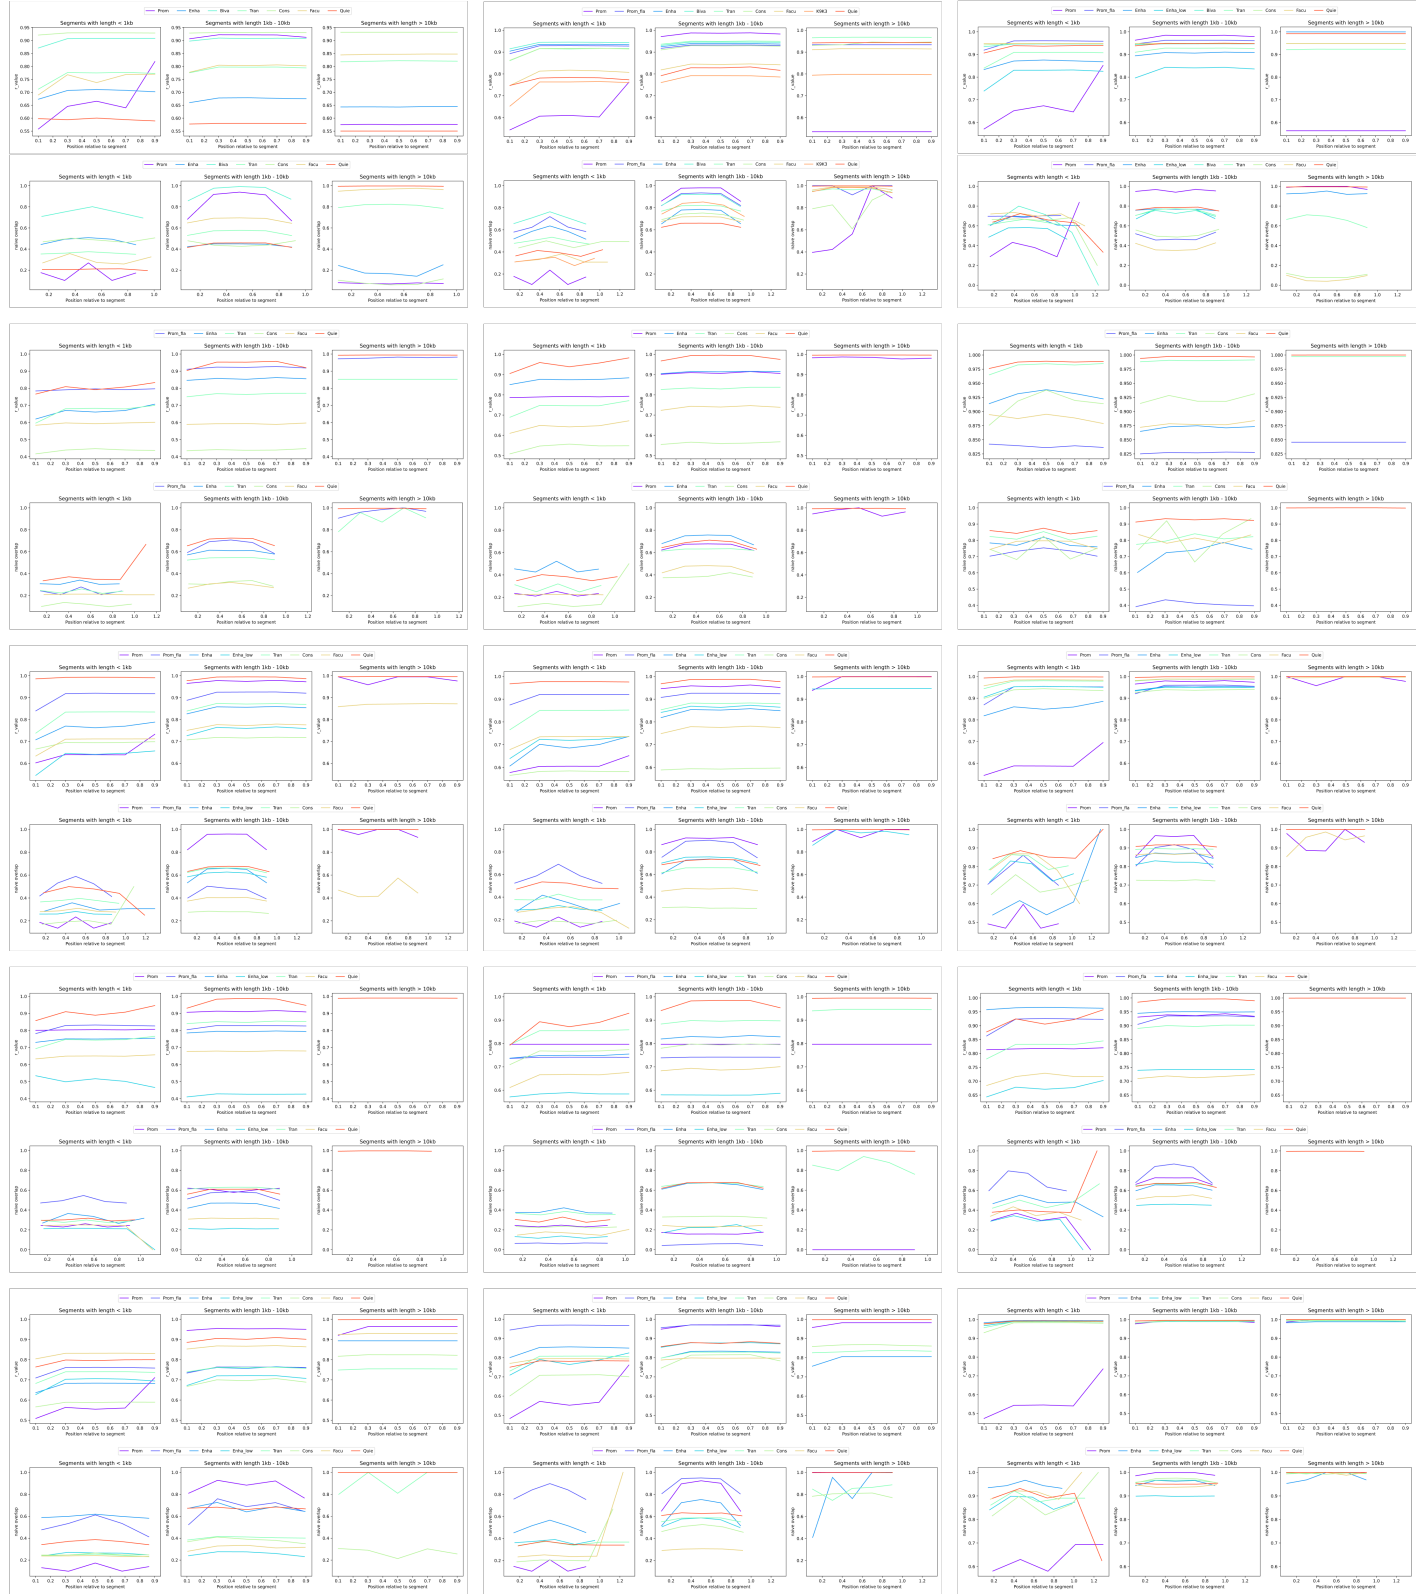

Figure 36: Figure illustrating reproducibility of Segway annotations across segment lengths. For each pair of cell type and setting, top and bottom sub-figures show r-value and naive overlap distribution, respectively. Sub-figures from left to right represent segments < 1 kb, 1 – 10kb, and  $\geq$  10kb. Colors denote different chromatin state categories.

## 6.7 Distribution of $r$ -value in open chromatin regions

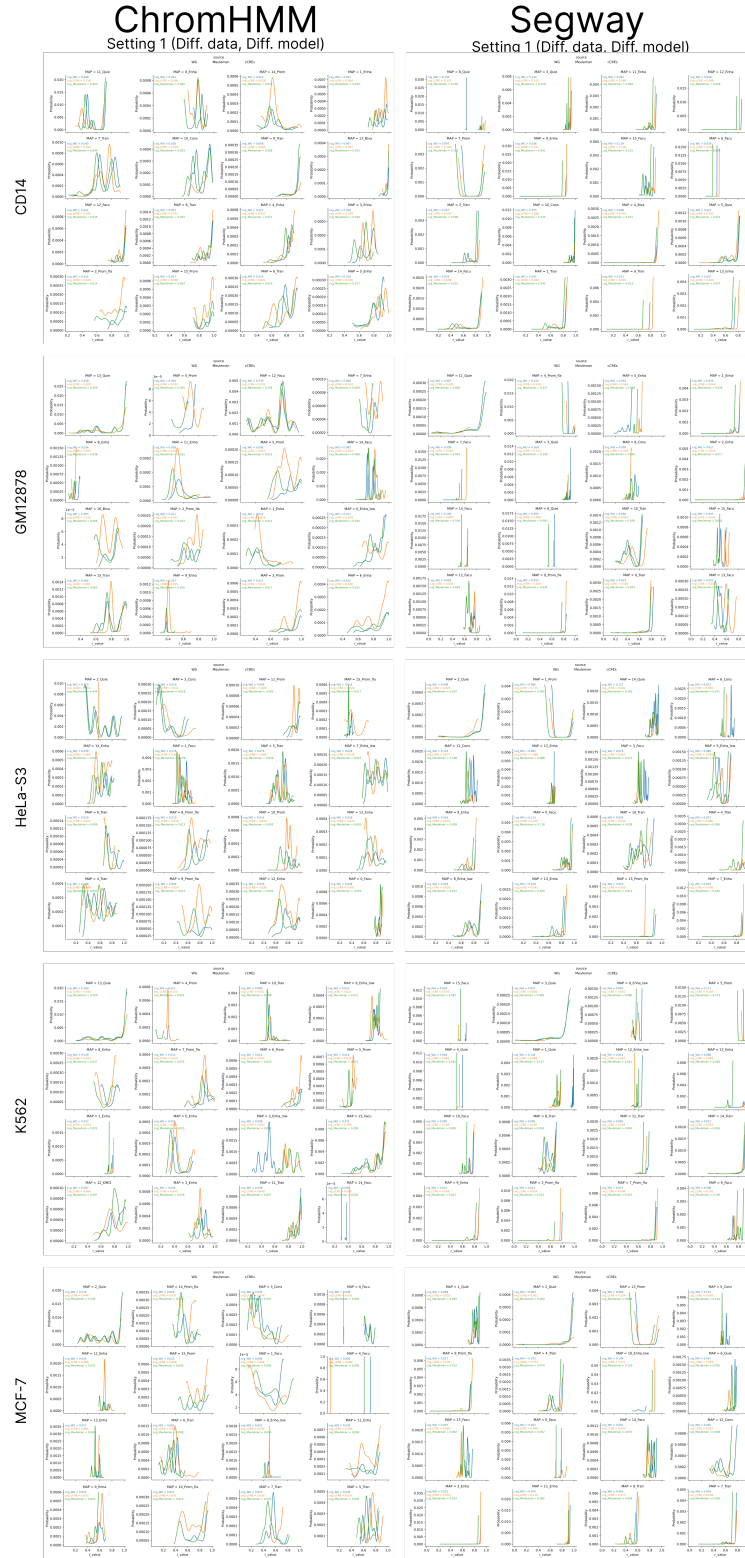

Figure 37: Figure comparing the distribution of  $r$ -values for different chromatin states (each sub-panel) in three scenarios: Whole Genome (WG - blue), SCREEN Candidate cis-regulatory Elements (cCRE - orange) [Moore et al., 2020], and Mueleman open chromatin regions [Meuleman et al., 2020] (green). The coverage of each chromatin state is indicated in the corresponding color. The area under each line represents the normalized frequency by corresponding genome coverage.

## 7 Comparison of Biologically Replicated ChIP-Seq Assays

### 7.1 CD14-positive-monocyte

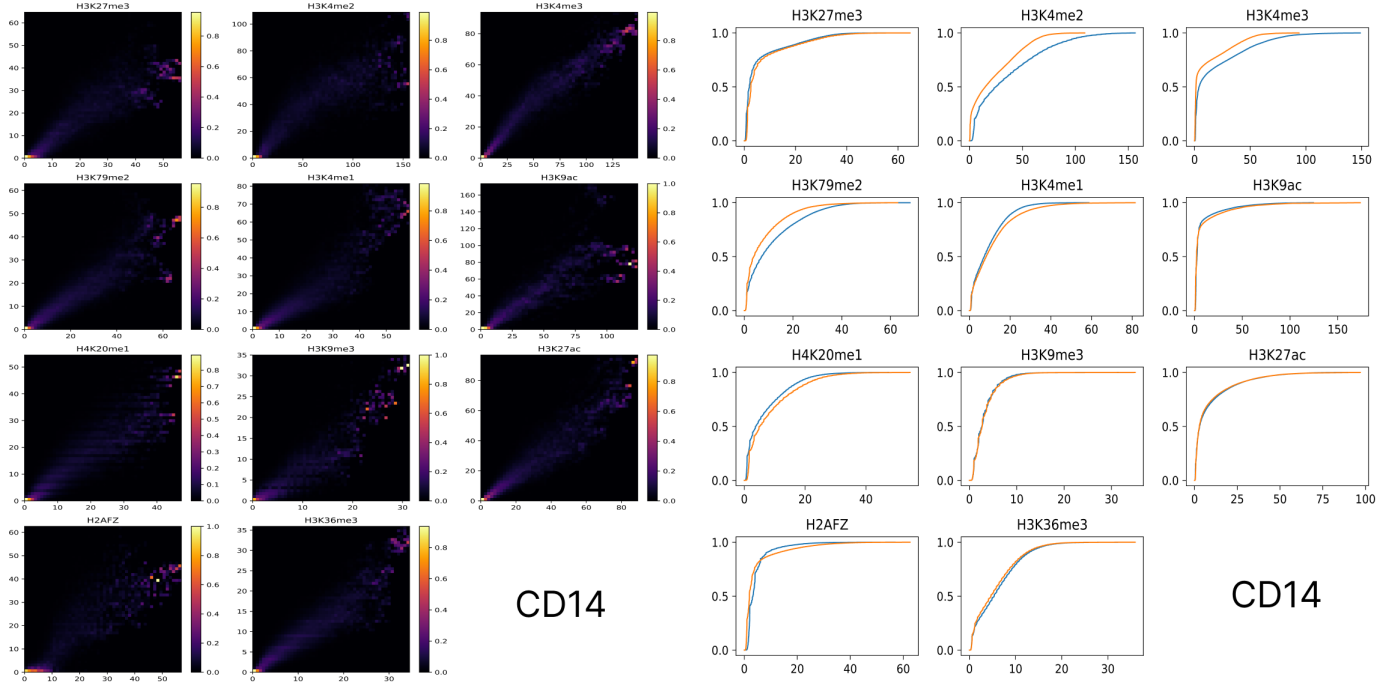

Figure 38: Heatmap of track values across two biological replicates for different histone modification tracks (left). On right, empirical cumulative distribution function (ECDF) of track values across two biological replicates for different histone modification tracks.

### 7.2 GM12878

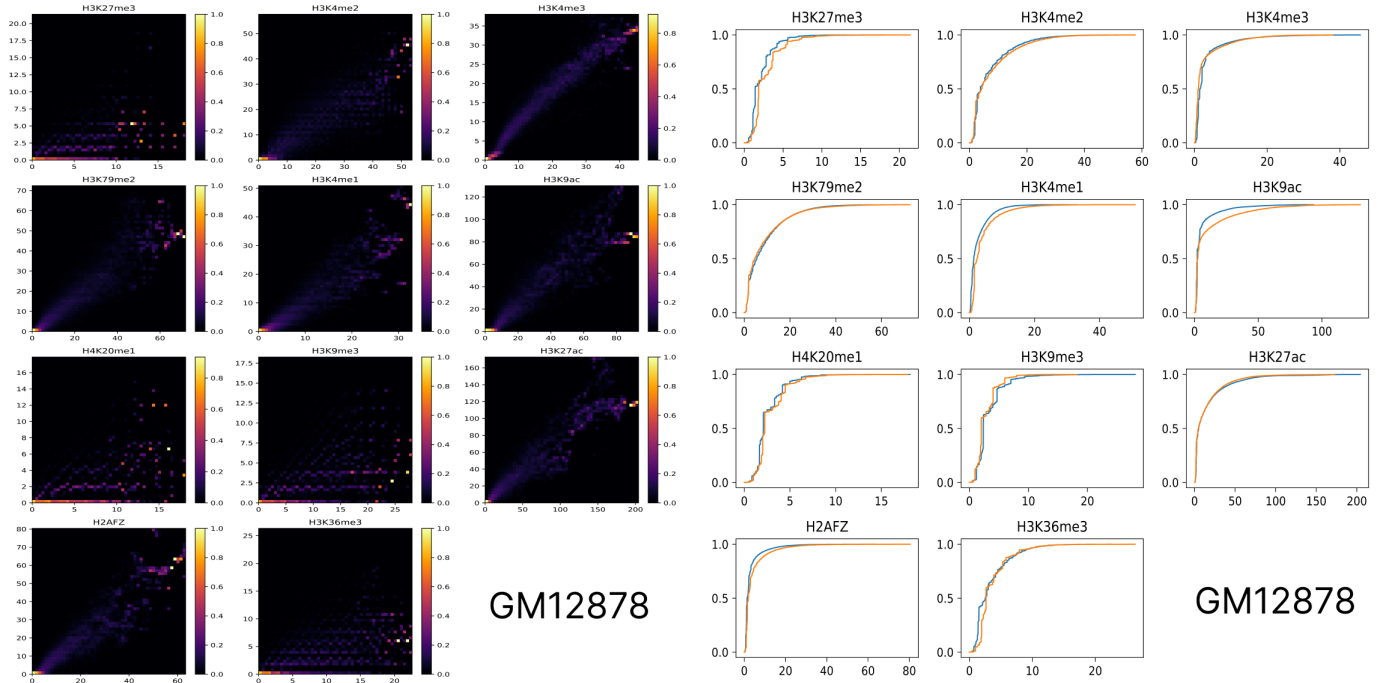

Figure 39: Heatmap of track values across two biological replicates for different histone modification tracks (left). On right, empirical cumulative distribution function (ECDF) of track values across two biological replicates for different histone modification tracks.

### 7.3 HeLa-S3

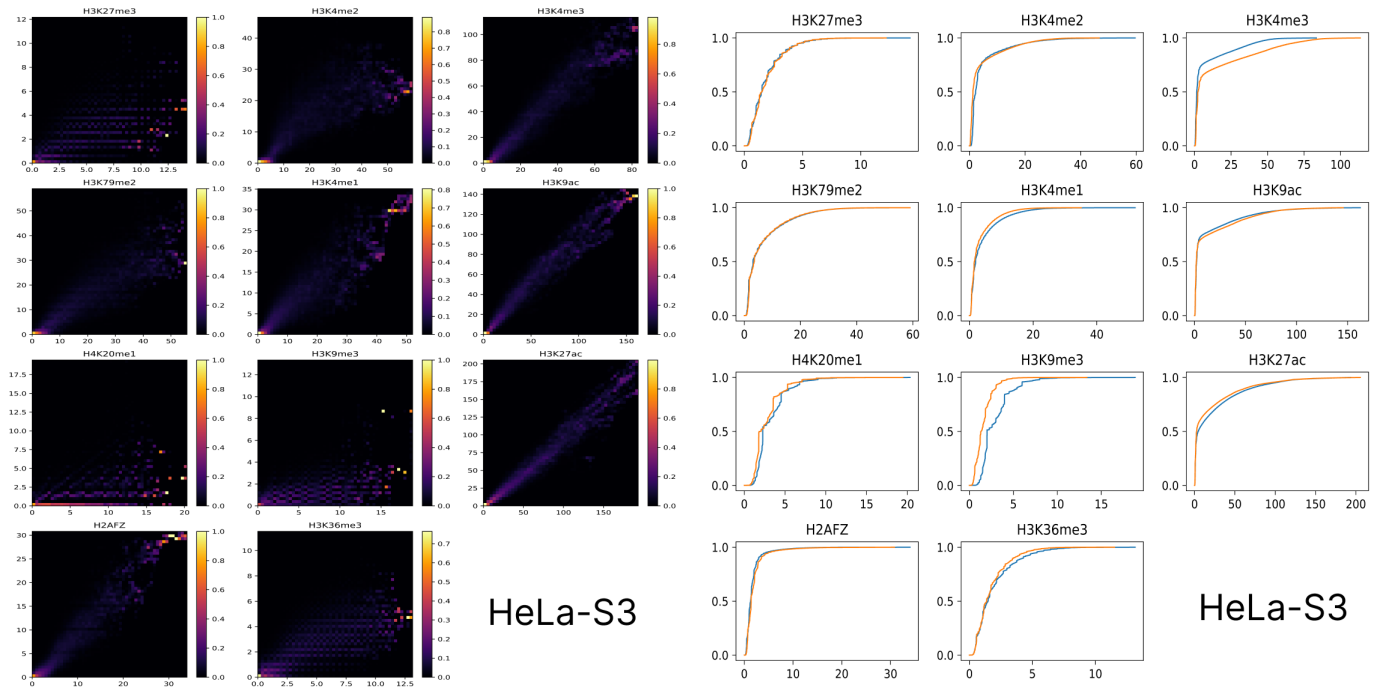

Figure 40: Heatmap of track values across two biological replicates for different histone modification tracks (left). On right, empirical cumulative distribution function (ECDF) of track values across two biological replicates for different histone modification tracks.

### 7.4 K562

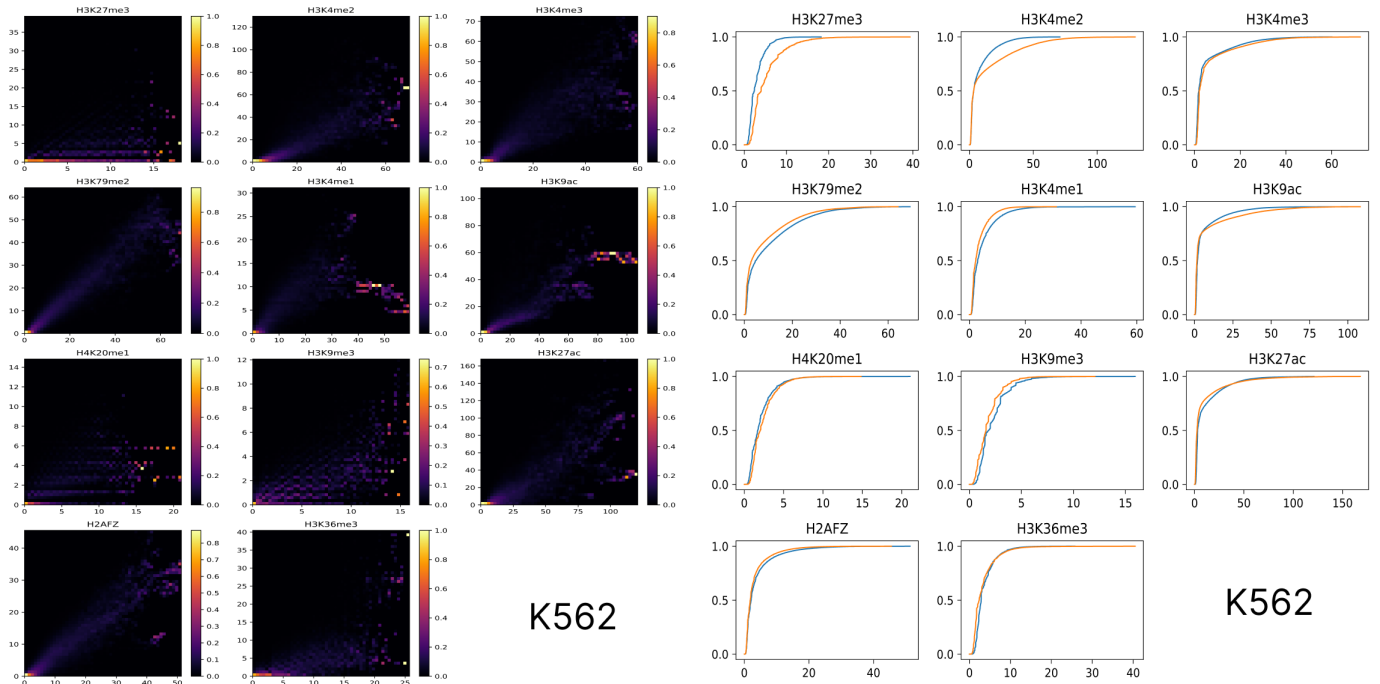

Figure 41: Heatmap of track values across two biological replicates for different histone modification tracks (left). On right, empirical cumulative distribution function (ECDF) of track values across two biological replicates for different histone modification tracks.

## 7.5 MCF-7

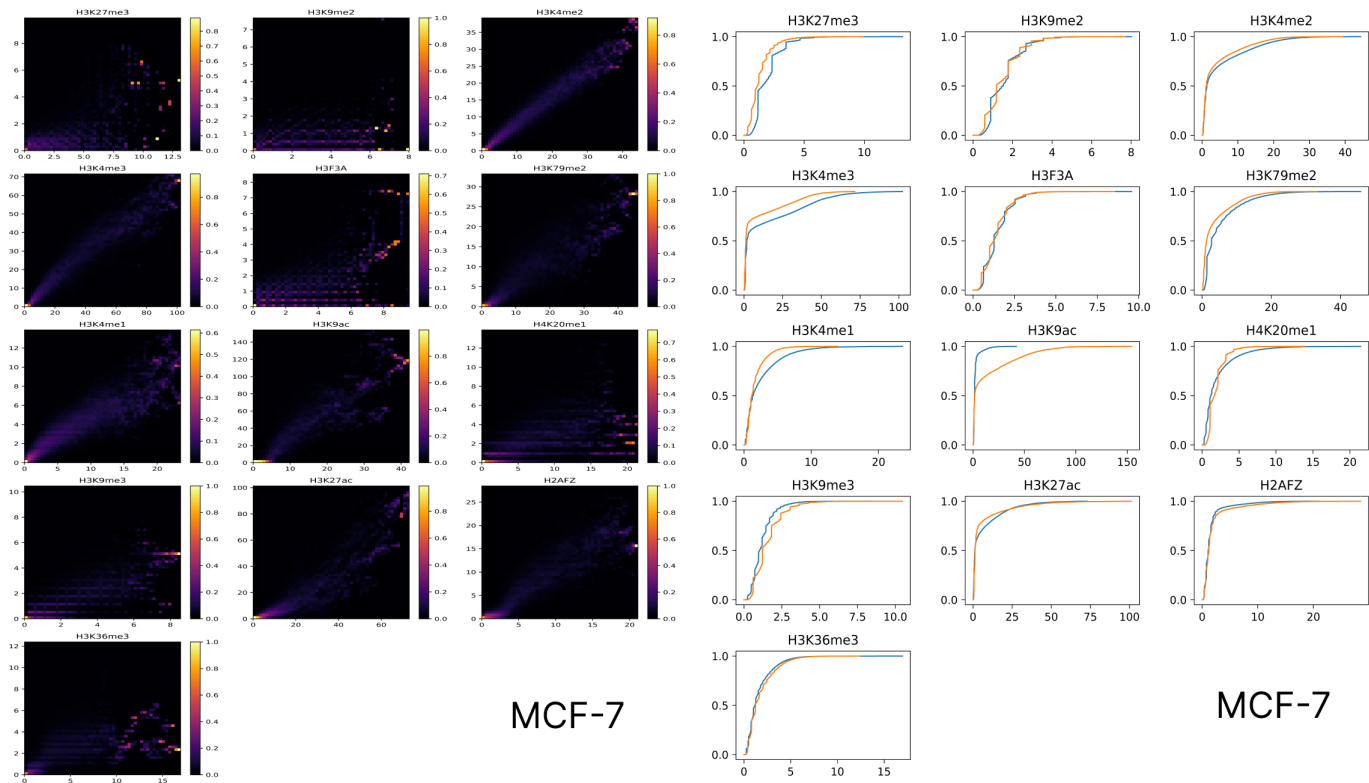

Figure 42: Heatmap of track values across two biological replicates for different histone modification tracks (left). On right, empirical cumulative distribution function (ECDF) of track values across two biological replicates for different histone modification tracks.



## 8 Data Summary

Table 2: This table contains the summary of data retrieved from ENCODE consortium [Consortium et al., 2012] and used to train both ChromHMM and Segway. For each experiment, two biosamples, each corresponding to an isogenic replicate, has been used. For each biosample, two files were retrieved, the aligned reads BAM file and the fold-change over control signal file respectively.

| Cell type | Experiment | Biosample            | Files                    |
|-----------|------------|----------------------|--------------------------|
| MCF-7     | H3K27me3   | ENCBS789UPK (rep. 1) | ENCFF413QYQ, ENCFF222KPM |
| MCF-7     | H3K27me3   | ENCBS967MVZ (rep. 2) | ENCFF744JQU, ENCFF070PLQ |
| MCF-7     | H3K9me2    | ENCBS789UPK (rep. 1) | ENCFF249TCH, ENCFF727FOP |
| MCF-7     | H3K9me2    | ENCBS967MVZ (rep. 2) | ENCFF418SFP, ENCFF727JSD |
| MCF-7     | H3K4me2    | ENCBS789UPK (rep. 1) | ENCFF134YPW, ENCFF095LXY |
| MCF-7     | H3K4me2    | ENCBS967MVZ (rep. 2) | ENCFF680ERD, ENCFF930AIB |
| MCF-7     | H3K4me3    | ENCBS789UPK (rep. 1) | ENCFF101TRI, ENCFF559CLH |
| MCF-7     | H3K4me3    | ENCBS967MVZ (rep. 2) | ENCFF374GQR, ENCFF763FZF |
| MCF-7     | H3F3A      | ENCBS789UPK (rep. 1) | ENCFF626ORM, ENCFF513VYY |
| MCF-7     | H3F3A      | ENCBS967MVZ (rep. 2) | ENCFF183HME, ENCFF820MMV |
| MCF-7     | H3K79me2   | ENCBS789UPK (rep. 1) | ENCFF312WJY, ENCFF921ILS |
| MCF-7     | H3K79me2   | ENCBS967MVZ (rep. 2) | ENCFF654NDM, ENCFF288DKP |
| MCF-7     | H3K4me1    | ENCBS789UPK (rep. 1) | ENCFF592EVS, ENCFF885FSN |
| MCF-7     | H3K4me1    | ENCBS967MVZ (rep. 2) | ENCFF748ISL, ENCFF943MKW |
| MCF-7     | H3K9ac     | ENCBS789UPK (rep. 1) | ENCFF571MVG, ENCFF967PEQ |
| MCF-7     | H3K9ac     | ENCBS967MVZ (rep. 2) | ENCFF403SOH, ENCFF699NOJ |
| MCF-7     | H4K20me1   | ENCBS789UPK (rep. 1) | ENCFF491EQT, ENCFF665VEZ |
| MCF-7     | H4K20me1   | ENCBS967MVZ (rep. 2) | ENCFF741HOA, ENCFF382BVG |
| MCF-7     | H3K9me3    | ENCBS789UPK (rep. 1) | ENCFF909MGB, ENCFF501WFD |
| MCF-7     | H3K9me3    | ENCBS967MVZ (rep. 2) | ENCFF923NDP, ENCFF587KXV |
| MCF-7     | H3K27ac    | ENCBS789UPK (rep. 1) | ENCFF785NUK, ENCFF395YPR |
| MCF-7     | H3K27ac    | ENCBS967MVZ (rep. 2) | ENCFF391BOB, ENCFF047PAZ |
| MCF-7     | H2AFZ      | ENCBS789UPK (rep. 1) | ENCFF597OEX, ENCFF269EVS |
| MCF-7     | H2AFZ      | ENCBS967MVZ (rep. 2) | ENCFF687JRM, ENCFF391YLE |
| MCF-7     | H3K36me3   | ENCBS789UPK (rep. 1) | ENCFF747AWB, ENCFF039TSW |
| MCF-7     | H3K36me3   | ENCBS967MVZ (rep. 2) | ENCFF551PNK, ENCFF781COV |
| GM12878   | H3K27me3   | ENCBS715VCP (rep. 1) | ENCFF633BHN, ENCFF119CAV |
| GM12878   | H3K27me3   | ENCBS830CIQ (rep. 2) | ENCFF565DCK, ENCFF736CNQ |
| GM12878   | H3K4me2    | ENCBS715VCP (rep. 1) | ENCFF008LEY, ENCFF028DRR |
| GM12878   | H3K4me2    | ENCBS830CIQ (rep. 2) | ENCFF081ODV, ENCFF922IYX |
| GM12878   | H3K4me3    | ENCBS715VCP (rep. 1) | ENCFF843BWY, ENCFF346GYG |
| GM12878   | H3K4me3    | ENCBS830CIQ (rep. 2) | ENCFF126HII, ENCFF874RRW |
| GM12878   | H3K79me2   | ENCBS715VCP (rep. 1) | ENCFF465NXQ, ENCFF567RPY |
| GM12878   | H3K79me2   | ENCBS830CIQ (rep. 2) | ENCFF967CHL, ENCFF595CSY |
| GM12878   | H3K4me1    | ENCBS715VCP (rep. 1) | ENCFF047NLO, ENCFF785YET |
| GM12878   | H3K4me1    | ENCBS830CIQ (rep. 2) | ENCFF385FLM, ENCFF721OOX |
| GM12878   | H3K9ac     | ENCBS715VCP (rep. 1) | ENCFF729HQN, ENCFF609XKG |
| GM12878   | H3K9ac     | ENCBS830CIQ (rep. 2) | ENCFF405REQ, ENCFF404TNY |
| GM12878   | H4K20me1   | ENCBS715VCP (rep. 1) | ENCFF132EDT, ENCFF150LOV |
| GM12878   | H4K20me1   | ENCBS830CIQ (rep. 2) | ENCFF334NVA, ENCFF069ZOX |
| GM12878   | H3K9me3    | ENCBS715VCP (rep. 1) | ENCFF306ENK, ENCFF698SKV |
| GM12878   | H3K9me3    | ENCBS830CIQ (rep. 2) | ENCFF889UPU, ENCFF856REE |
| GM12878   | H3K27ac    | ENCBS715VCP (rep. 1) | ENCFF269GKF, ENCFF458CRP |
| GM12878   | H3K27ac    | ENCBS830CIQ (rep. 2) | ENCFF201OHV, ENCFF716VWO |
| GM12878   | H2AFZ      | ENCBS715VCP (rep. 1) | ENCFF703AIM, ENCFF477ZQM |
| GM12878   | H2AFZ      | ENCBS830CIQ (rep. 2) | ENCFF256UUQ, ENCFF553GSY |
| GM12878   | H3K36me3   | ENCBS715VCP (rep. 1) | ENCFF353YPB, ENCFF269OIU |
| GM12878   | H3K36me3   | ENCBS830CIQ (rep. 2) | ENCFF677MAG, ENCFF831NQV |
| K562      | H3K27me3   | ENCBS639AAA (rep. 1) | ENCFF392ZKG, ENCFF585RVP |
| K562      | H3K27me3   | ENCBS674MPN (rep. 2) | ENCFF905CZD, ENCFF679YZC |

|                |          |                      |                          |
|----------------|----------|----------------------|--------------------------|
| K562           | H3K4me2  | ENCBS639AAA (rep. 1) | ENCFF446FUS, ENCFF229IJV |
| K562           | H3K4me2  | ENCBS674MPN (rep. 2) | ENCFF583GSH, ENCFF386XDJ |
| K562           | H3K4me3  | ENCBS639AAA (rep. 1) | ENCFF564SVK, ENCFF545JLB |
| K562           | H3K4me3  | ENCBS674MPN (rep. 2) | ENCFF685PPQ, ENCFF617VRS |
| K562           | H3K79me2 | ENCBS639AAA (rep. 1) | ENCFF465UWC, ENCFF952GNK |
| K562           | H3K79me2 | ENCBS674MPN (rep. 2) | ENCFF863HNL, ENCFF080CBF |
| K562           | H3K4me1  | ENCBS639AAA (rep. 1) | ENCFF352HXD, ENCFF490RQD |
| K562           | H3K4me1  | ENCBS674MPN (rep. 2) | ENCFF415GHS, ENCFF149FZG |
| K562           | H3K9ac   | ENCBS639AAA (rep. 1) | ENCFF149MXA, ENCFF236VCK |
| K562           | H3K9ac   | ENCBS674MPN (rep. 2) | ENCFF505NMT, ENCFF650QTM |
| K562           | H4K20me1 | ENCBS639AAA (rep. 1) | ENCFF255QRL, ENCFF091XLR |
| K562           | H4K20me1 | ENCBS674MPN (rep. 2) | ENCFF923YUN, ENCFF006AYV |
| K562           | H3K9me3  | ENCBS639AAA (rep. 1) | ENCFF104THG, ENCFF103IHG |
| K562           | H3K9me3  | ENCBS674MPN (rep. 2) | ENCFF155UQU, ENCFF600IBI |
| K562           | H3K27ac  | ENCBS639AAA (rep. 1) | ENCFF121RHF, ENCFF977KGH |
| K562           | H3K27ac  | ENCBS674MPN (rep. 2) | ENCFF907MNY, ENCFF745TSK |
| K562           | H2AFZ    | ENCBS639AAA (rep. 1) | ENCFF874SMO, ENCFF242WQK |
| K562           | H2AFZ    | ENCBS674MPN (rep. 2) | ENCFF007YZT, ENCFF964BCA |
| K562           | H3K36me3 | ENCBS639AAA (rep. 1) | ENCFF880HKV, ENCFF782UNG |
| K562           | H3K36me3 | ENCBS674MPN (rep. 2) | ENCFF272JVI, ENCFF860PQP |
| CD14+ monocyte | H3K27me3 | ENCBS188BKX (rep. 1) | ENCFF630ANH, ENCFF840DRQ |
| CD14+ monocyte | H3K27me3 | ENCBS865RXK (rep. 2) | ENCFF785GAD, ENCFF586PRJ |
| CD14+ monocyte | H3K4me2  | ENCBS188BKX (rep. 1) | ENCFF591CTO, ENCFF572NHK |
| CD14+ monocyte | H3K4me2  | ENCBS865RXK (rep. 2) | ENCFF384IVB, ENCFF031HMX |
| CD14+ monocyte | H3K4me3  | ENCBS188BKX (rep. 1) | ENCFF640GCK, ENCFF367ZHA |
| CD14+ monocyte | H3K4me3  | ENCBS865RXK (rep. 2) | ENCFF144PKE, ENCFF439PJT |
| CD14+ monocyte | H3K79me2 | ENCBS188BKX (rep. 1) | ENCFF463WUU, ENCFF464AAD |
| CD14+ monocyte | H3K79me2 | ENCBS865RXK (rep. 2) | ENCFF159LCH, ENCFF451RBS |
| CD14+ monocyte | H3K4me1  | ENCBS188BKX (rep. 1) | ENCFF573MNS, ENCFF281FSL |
| CD14+ monocyte | H3K4me1  | ENCBS865RXK (rep. 2) | ENCFF141KHX, ENCFF669AVC |
| CD14+ monocyte | H3K9ac   | ENCBS188BKX (rep. 1) | ENCFF775XVG, ENCFF835QUH |
| CD14+ monocyte | H3K9ac   | ENCBS865RXK (rep. 2) | ENCFF326KCT, ENCFF627PKL |
| CD14+ monocyte | H4K20me1 | ENCBS865RXK (rep. 2) | ENCFF238ZAC, ENCFF938RSM |
| CD14+ monocyte | H4K20me1 | ENCBS188BKX (rep. 1) | ENCFF899MAF, ENCFF657KKL |
| CD14+ monocyte | H3K9me3  | ENCBS188BKX (rep. 1) | ENCFF537BKE, ENCFF264DFY |
| CD14+ monocyte | H3K9me3  | ENCBS865RXK (rep. 2) | ENCFF168UCU, ENCFF726FHO |
| CD14+ monocyte | H3K27ac  | ENCBS188BKX (rep. 1) | ENCFF014BCD, ENCFF078DZN |
| CD14+ monocyte | H3K27ac  | ENCBS865RXK (rep. 2) | ENCFF872QFO, ENCFF948MET |
| CD14+ monocyte | H2AFZ    | ENCBS188BKX (rep. 1) | ENCFF891JRY, ENCFF834IMH |
| CD14+ monocyte | H2AFZ    | ENCBS865RXK (rep. 2) | ENCFF992JKA, ENCFF175WGJ |
| CD14+ monocyte | H3K36me3 | ENCBS188BKX (rep. 1) | ENCFF629ODR, ENCFF494ICL |
| CD14+ monocyte | H3K36me3 | ENCBS865RXK (rep. 2) | ENCFF150SGV, ENCFF554VRE |
| HeLa-S3        | H3K27me3 | ENCBS075PNA (rep. 1) | ENCFF299WXR, ENCFF971CNR |
| HeLa-S3        | H3K27me3 | ENCBS655ARO (rep. 2) | ENCFF620CCL, ENCFF837NDL |
| HeLa-S3        | H3K4me2  | ENCBS075PNA (rep. 1) | ENCFF622IIB, ENCFF375VEB |
| HeLa-S3        | H3K4me2  | ENCBS655ARO (rep. 2) | ENCFF706FSX, ENCFF146XSE |
| HeLa-S3        | H3K4me3  | ENCBS075PNA (rep. 1) | ENCFF300IWJ, ENCFF532TVQ |
| HeLa-S3        | H3K4me3  | ENCBS655ARO (rep. 2) | ENCFF766LEF, ENCFF933NWW |
| HeLa-S3        | H3K79me2 | ENCBS075PNA (rep. 1) | ENCFF616FAT, ENCFF976XPV |
| HeLa-S3        | H3K79me2 | ENCBS655ARO (rep. 2) | ENCFF656YCM, ENCFF418AXA |
| HeLa-S3        | H3K4me1  | ENCBS075PNA (rep. 1) | ENCFF826OLG, ENCFF554WAD |
| HeLa-S3        | H3K4me1  | ENCBS655ARO (rep. 2) | ENCFF712AAP, ENCFF257YVT |
| HeLa-S3        | H3K9ac   | ENCBS075PNA (rep. 1) | ENCFF113FCH, ENCFF753SWH |
| HeLa-S3        | H3K9ac   | ENCBS655ARO (rep. 2) | ENCFF596XSW, ENCFF995MCG |
| HeLa-S3        | H4K20me1 | ENCBS075PNA (rep. 1) | ENCFF278FTJ, ENCFF776IYG |
| HeLa-S3        | H4K20me1 | ENCBS655ARO (rep. 2) | ENCFF310NWI, ENCFF002OOC |
| HeLa-S3        | H3K9me3  | ENCBS075PNA (rep. 1) | ENCFF183EDU, ENCFF746UJB |
| HeLa-S3        | H3K9me3  | ENCBS655ARO (rep. 2) | ENCFF520XFF, ENCFF629AAP |
| HeLa-S3        | H3K27ac  | ENCBS075PNA (rep. 1) | ENCFF609ZAE, ENCFF010QGR |
| HeLa-S3        | H3K27ac  | ENCBS655ARO (rep. 2) | ENCFF711QAI, ENCFF855XCJ |



|         |          |                      |                          |
|---------|----------|----------------------|--------------------------|
| HeLa-S3 | H2AFZ    | ENCBS075PNA (rep. 1) | ENCFF650RBB, ENCFF423XMI |
| HeLa-S3 | H2AFZ    | ENCBS655ARO (rep. 2) | ENCFF822OCY, ENCFF104TOM |
| HeLa-S3 | H3K36me3 | ENCBS075PNA (rep. 1) | ENCFF317FFS, ENCFF305UYI |
| HeLa-S3 | H3K36me3 | ENCBS655ARO (rep. 2) | ENCFF008RRT, ENCFF870FDA |

# References

- [Chan et al., 2018] Chan, R. C., Libbrecht, M. W., Roberts, E. G., Bilmes, J. A., Noble, W. S., and Hoffman, M. M. (2018). Segway 2.0: Gaussian mixture models and minibatch training. *Bioinformatics*, 34(4):669–671.
- [Consortium et al., 2012] Consortium, E. P. et al. (2012). An integrated encyclopedia of dna elements in the human genome. *Nature*, 489(7414):57.
- [Ernst and Kellis, 2012] Ernst, J. and Kellis, M. (2012). Chromhmm: automating chromatin-state discovery and characterization. *Nature methods*, 9(3):215–216.
- [Hoffman et al., 2010] Hoffman, M. M., Buske, O. J., and Noble, W. S. (2010). The genomdata format for storing large-scale functional genomics data. *Bioinformatics*, 26(11):1458–1459.
- [Hoffman et al., 2012] Hoffman, M. M., Buske, O. J., Wang, J., Weng, Z., Bilmes, J. A., and Noble, W. S. (2012). Unsupervised pattern discovery in human chromatin structure through genomic segmentation. *Nature methods*, 9(5):473–476.
- [Hoffman et al., 2013] Hoffman, M. M., Ernst, J., Wilder, S. P., Kundaje, A., Harris, R. S., Libbrecht, M., Giardine, B., Ellenbogen, P. M., Bilmes, J. A., Birney, E., et al. (2013). Integrative annotation of chromatin elements from encode data. *Nucleic acids research*, 41(2):827–841.
- [Libbrecht et al., 2019] Libbrecht, M. W., Rodriguez, O. L., Weng, Z., Bilmes, J. A., Hoffman, M. M., and Noble, W. S. (2019). A unified encyclopedia of human functional dna elements through fully automated annotation of 164 human cell types. *Genome biology*, 20(1):1–14.
- [Meuleman et al., 2020] Meuleman, W., Muratov, A., Rynes, E., Halow, J., Lee, K., Bates, D., Diegel, M., Dunn, D., Neri, F., Teodosiadis, A., et al. (2020). Index and biological spectrum of human dnase i hypersensitive sites. *Nature*, 584(7820):244–251.
- [Moore et al., 2020] Moore, J. E., Purcaro, M. J., Pratt, H. E., Epstein, C. B., Shores, N., Adrian, J., Kawli, T., Davis, C. A., Dobin, A., et al. (2020). Expanded encyclopaedias of dna elements in the human and mouse genomes. *Nature*, 583(7818):699–710.
